# Supplementary material for: Time-resolved quantification of key species and mechanistic insights in low-temperature tetrahydrofuran oxidation
Source: Royal Society of Chemistry journal article supplement (doi:10.1039/d3cp06227a), 2024-01-01
Supplement: d3cp06227a2.xlsx [file d3cp06227a2.xlsx]

## Sheet: 450K
Time (ms)	m/z 28 Ethene	m/z 30 Formaldehyde	m/z 56 Acrolein	m/z 70 (2,3-DHF & 2,5-DHF)	m/z 86 THF-3-one	m/z 71 ROO	m/z 58 butanedial	m/z 103 OOQOOH	Sum UHP + KHP	m/z 84	m/z 72 THF
-30	43362900000	-116553000000	-70773200000	-100292000000	-85521100000	2126380000000	57276700000	-73081300000	23716200000	4955010000	502576000000000
-29.75	-215571000000	30713400000	-70773200000	169116000000	10488400000	-3955410000000	133646000000	-477578000000	-3824290000	16294400000	502716000000000
-29.5	-363534000000	84265000000	99278000000	52372300000	172966000000	-59458700000	0	-123643000000	95929500000	4955010000	501325000000000
-29.25	117344000000	191368000000	827317000	34411800000	32644500000	-4905800000000	28638400000	-123643000000	30532500000	4955010000	503882000000000
-29	209821000000	-156717000000	-34972900000	222997000000	-19052900000	-287883000000	9546120000	280853000000	20201000000	-51741800000	498262000000000
-28.75	209821000000	-22838200000	-17072800000	-1509290000	-33823600000	3312740000000	85915100000	-73081300000	-31303600000	-6384350000	497574000000000
-28.5	246811000000	177980000000	-8122750000	-28450100000	10488400000	-60421800000	133646000000	-22519200000	23685600000	-6384350000	497222000000000
-28.25	246811000000	-290596000000	-115524000000	-82331700000	3103090000	-2604130000000	66822900000	129167000000	78735900000	-17723700000	502702000000000
-28	-271057000000	-183493000000	-26022900000	231978000000	-19052900000	3000420000000	0	129167000000	-20987400000	38973100000	497883000000000
-27.75	-123095000000	17325500000	-52873100000	-109273000000	-33823600000	817626000000	-171830000000	-224768000000	-10732300000	-6384350000	498206000000000
-27.5	6372330000	17325500000	-8122750000	-109273000000	-4282260000	-936747000000	28638400000	280853000000	16899900000	-17723700000	500735000000000
-27.25	154335000000	-22838200000	126128000000	115234000000	54800500000	-81567000000	-95461200000	78604900000	-31303600000	-17723700000	498276000000000
-27	43362900000	-183493000000	-26022900000	124214000000	69571200000	-1248550000000	66822900000	129167000000	109654000000	-29063100000	503714000000000
-26.75	24867600000	244920000000	-34972900000	-55390900000	40029800000	-2496690000000	-124100000000	-376454000000	54649500000	61651800000	498318000000000
-26.5	-419020000000	-277208000000	-133424000000	249938000000	10488400000	-1850530000000	85915100000	-325892000000	-20972100000	-40402400000	500454000000000
-26.25	-326543000000	-129941000000	-70773200000	70332900000	10488400000	4275450000000	-57276700000	331415000000	3053180000	-6384350000	499189000000000
-26	-160085000000	-223657000000	99278000000	133195000000	-122448000000	-1018580000000	152738000000	-123643000000	13369400000	4955010000	497967000000000
-25.75	80353500000	44101300000	90328000000	231978000000	-4282260000	1117580000000	-133646000000	-224768000000	-3824290000	-63081100000	501100000000000
-25.5	-234067000000	-22838200000	72427800000	43392100000	40029800000	-2230310000000	133646000000	-73081300000	68389100000	16294400000	504234000000000
-25.25	246811000000	-170105000000	-26022900000	97273700000	-85521100000	-4427640000000	-28638400000	-22519200000	-27910700000	16294400000	501831000000000
-25	172830000000	-89777700000	-133424000000	124214000000	84341900000	-2523330000000	162284000000	129167000000	40971000000	38973100000	500131000000000
-24.75	-234067000000	3937620000	72427800000	-1509290000	-11667600000	-165091000000	-114553000000	-123643000000	-400846000	16294400000	498234000000000
-24.5	-437515000000	418962000000	36627600000	16451300000	99112600000	-640089000000	9546120000	280853000000	-34803500000	-29063100000	500721000000000
-24.25	394774000000	30713400000	-8122750000	-172134000000	3103090000	3005600000000	0	-22519200000	-24472000000	-6384350000	498164000000000
-24	191325000000	-170105000000	54527700000	52372300000	-19052900000	2529900000000	-76369000000	230291000000	-34742300000	27633700000	497883000000000
-23.75	-123095000000	-290596000000	-8122750000	-19469800000	54800500000	651201000000	-85915100000	28042800000	-45058500000	61651800000	496042000000000
-23.5	-493001000000	-277208000000	-43923000000	-64371200000	-48594300000	-505111000000	95461200000	483102000000	-79476400000	-17723700000	501002000000000
-23.25	-419020000000	177980000000	-26022900000	52372300000	25259100000	2822900000000	-85915100000	179729000000	-416138000	-29063100000	498374000000000
-23	80353500000	-143329000000	108228000000	-37430400000	-26438300000	-1104370000000	-47730600000	-123643000000	20292700000	27633700000	500356000000000
-22.75	135839000000	-76389800000	-61823100000	-154174000000	-55979700000	-328466000000	-38184500000	-224768000000	6568370000	16294400000	501255000000000
-22.5	135839000000	271696000000	-34972900000	115234000000	47415200000	-1833420000000	38184500000	78604900000	44287400000	-29063100000	499709000000000
-22.25	-548487000000	-89777700000	90328000000	97273700000	-70750400000	799435000000	76369000000	-275330000000	-10701800000	-40402400000	495986000000000
-22	-49113600000	-129941000000	135078000000	-64371200000	-19052900000	1942710000000	114553000000	-73081300000	44272100000	-6384350000	498684000000000
-21.75	-123095000000	-129941000000	-8122750000	-10489600000	32644500000	-2133720000000	-47730600000	-22519200000	40848700000	-29063100000	503840000000000
-21.5	154335000000	-36226100000	-106573000000	-154174000000	-92906400000	-1454620000000	200469000000	179729000000	44256800000	4955010000	501423000000000
-21.25	-345038000000	-63001900000	-34972900000	25431500000	10488400000	1386140000000	-124100000000	-325892000000	23777300000	-6384350000	499737000000000
-21	-511496000000	231532000000	18727400000	7470980000	-26438300000	3795950000000	28638400000	331415000000	23685600000	38973100000	496941000000000
-20.75	24867600000	-63001900000	827317000	-1509290000	-11667600000	-850566000000	-95461200000	129167000000	-76037700000	4955010000	502154000000000
-20.5	-178581000000	57489200000	18727400000	43392100000	10488400000	166105000000	85915100000	179729000000	-38211600000	4955010000	499302000000000
-20.25	376278000000	311859000000	-61823100000	-73351500000	-26438300000	1971380000	105007000000	78604900000	-7278310000	38973100000	501929000000000
-20	6372330000	-9450280000	-43923000000	-64371200000	54800500000	1488480000000	-114553000000	-123643000000	27139600000	-6384350000	499920000000000
-19.75	24867600000	-237045000000	135078000000	-1509290000	-33823600000	-80929700000	95461200000	-123643000000	-41635100000	16294400000	499808000000000
-19.5	-67608900000	124429000000	-17072800000	-46410600000	-11667600000	-1180880000000	-105007000000	230291000000	-10686500000	-17723700000	500342000000000
-19.25	154335000000	3937620000	63477800000	-145194000000	25259100000	-867740000000	-171830000000	381977000000	-14094600000	4955010000	501662000000000
-19	43362900000	111041000000	-70773200000	-100292000000	-48594300000	-1736570000000	152738000000	-73081300000	3022600000	-6384350000	500651000000000
-18.75	-30618300000	-196881000000	81377900000	16451300000	47415200000	896488000000	-162284000000	129167000000	-370263000	4955010000	500637000000000
-18.5	-49113600000	-223657000000	9777380000	7470980000	-70750400000	-2584130000000	-162284000000	-275330000000	20338600000	-17723700000	497447000000000
-18.25	6372330000	244920000000	63477800000	-10489600000	-78135700000	2747140000000	-19092200000	533664000000	20216300000	-29063100000	498754000000000
-18	98848800000	-303984000000	-97623400000	160136000000	-33823600000	-108527000000	-66822900000	-325892000000	-34788200000	-51741800000	497517000000000
-17.75	80353500000	-49614000000	-52873100000	16451300000	17873800000	578168000000	-105007000000	-174205000000	27139600000	4955010000	499035000000000
-17.5	24867600000	-143329000000	81377900000	-208056000000	25259100000	-1882840000000	-28638400000	-22519200000	-27880100000	50312500000	502927000000000
-17.25	-160085000000	164592000000	152978000000	79313100000	25259100000	2865320000000	9546120000	381977000000	-370263000	-6384350000	498740000000000
-17	246811000000	-237045000000	-26022900000	-127233000000	32644500000	-391102000000	-85915100000	381977000000	3114340000	-17723700000	498824000000000
-16.75	24867600000	-223657000000	233529000000	339741000000	-33823600000	792048000000	28638400000	381977000000	37517000000	-29063100000	495761000000000
-16.5	265307000000	44101300000	9777380000	-91312000000	-55979700000	-3125410000000	38184500000	-123643000000	-400846000	-6384350000	501620000000000
-16.25	-30618300000	-36226100000	-79723300000	-82331700000	25259100000	-1727730000000	-19092200000	-73081300000	-14171100000	38973100000	500426000000000
-16	43362900000	70877100000	-61823100000	88293400000	-11667600000	-1824770000000	-124100000000	-174205000000	-24426100000	-6384350000	499386000000000
-15.75	-49113600000	97652900000	-43923000000	7470980000	-48594300000	688599000000	-9546120000	-275330000000	-58828700000	-40402400000	502210000000000
-15.5	-215571000000	-36226100000	-160274000000	-55390900000	40029800000	3206790000000	143192000000	634788000000	27170200000	50312500000	495522000000000
-15.25	-123095000000	3937620000	72427800000	106254000000	-11667600000	-1647940000000	124100000000	179729000000	6476620000	4955010000	499737000000000
-15	-30618300000	-103166000000	117178000000	-19469800000	-26438300000	-455759000000	143192000000	-325892000000	-55374700000	4955010000	496548000000000
-14.75	-86104200000	30713400000	-34972900000	16451300000	-33823600000	1542020000000	-19092200000	280853000000	33940600000	16294400000	501241000000000
-14.5	-49113600000	-129941000000	-17072800000	-154174000000	40029800000	-253915000000	38184500000	28042800000	-14125200000	-6384350000	499049000000000
-14.25	-345038000000	-183493000000	-151324000000	-37430400000	-26438300000	-3061150000000	-76369000000	-224768000000	51302500000	27633700000	500089000000000
-14	-12123000000	-317372000000	-106573000000	133195000000	25259100000	-1235870000000	-66822900000	78604900000	-79507000000	-6384350000	499470000000000
-13.75	431764000000	-22838200000	108228000000	61352600000	17873800000	176325000000	0	78604900000	13400000000	-6384350000	497391000000000
-13.5	61858200000	44101300000	-8122750000	16451300000	25259100000	619578000000	-152738000000	230291000000	-7232440000	27633700000	497672000000000
-13.25	-178581000000	30713400000	54527700000	-154174000000	-55979700000	1042620000000	-114553000000	-528140000000	-48543100000	-6384350000	495887000000000
-13	117344000000	137817000000	-34972900000	160136000000	17873800000	-1335620000000	-28638400000	-477578000000	3175510000	27633700000	499428000000000
-12.75	-12123000000	-89777700000	90328000000	-55390900000	10488400000	-1662580000000	190922000000	78604900000	-10717000000	-17723700000	501761000000000
-12.5	-49113600000	325247000000	-8122750000	-73351500000	69571200000	1757850000000	38184500000	-73081300000	-69160200000	-29063100000	496576000000000
-12.25	-67608900000	151204000000	-34972900000	-279898000000	-33823600000	745650000000	28638400000	-73081300000	3053180000	4955010000	496941000000000
-12	-160085000000	124429000000	45577600000	-100292000000	-11667600000	-1957460000000	47730600000	280853000000	-27895400000	16294400000	503896000000000
-11.75	598222000000	-170105000000	-97623400000	70332900000	-26438300000	457464000000	-124100000000	-325892000000	-21063800000	-40402400000	500145000000000
-11.5	-104599000000	-63001900000	-17072800000	7470980000	-11667600000	474584000000	-57276700000	-275330000000	-24441400000	4955010000	503011000000000
-11.25	-160085000000	-223657000000	135078000000	52372300000	76956500000	-3091190000000	-95461200000	634788000000	-38211600000	27633700000	503742000000000
-11	172830000000	378799000000	-26022900000	115234000000	91727200000	1629070000000	19092200000	179729000000	95960100000	16294400000	498304000000000
-10.75	-86104200000	-263820000000	-17072800000	-82331700000	10488400000	-21762800000	-76369000000	-73081300000	23700900000	-17723700000	502843000000000
-10.5	-67608900000	-237045000000	90328000000	-181115000000	-48594300000	776217000000	66822900000	-528140000000	6507200000	-6384350000	499569000000000
-10.25	98848800000	-76389800000	-61823100000	-91312000000	-33823600000	-1500140000000	-124100000000	-123643000000	-7308890000	4955010000	501859000000000
-10	135839000000	177980000000	45577600000	-64371200000	-26438300000	4632440000000	-219561000000	-376454000000	27109000000	-6384350000	493204000000000
-9.75	-30618300000	-357536000000	45577600000	-100292000000	-4282260000	-384460000000	28638400000	-73081300000	-7186560000	27633700000	502266000000000
-9.5	-160085000000	271696000000	-34972900000	-91312000000	-55979700000	-2796250000000	76369000000	584226000000	-48512500000	4955010000	499232000000000
-9.25	43362900000	-303984000000	-17072800000	-136213000000	-4282260000	-1606460000000	162284000000	78604900000	33971200000	-17723700000	499611000000000
-9	-123095000000	-237045000000	36627600000	-73351500000	-48594300000	1047180000000	-105007000000	-22519200000	6491910000	16294400000	498248000000000
-8.75	265307000000	-156717000000	90328000000	97273700000	-19052900000	1610440000000	19092200000	-22519200000	23655000000	16294400000	498262000000000
-8.5	265307000000	17325500000	-8122750000	-199075000000	17873800000	-1672860000000	47730600000	230291000000	-31288300000	-51741800000	502435000000000
-8.25	-215571000000	-558354000000	-133424000000	151155000000	99112600000	1093280000000	-38184500000	-224768000000	-17548600000	-29063100000	501718000000000
-8	468755000000	-49614000000	81377900000	-109273000000	-41209000000	-609075000000	-143192000000	-73081300000	68435000000	27633700000	504781000000000
-7.75	209821000000	-103166000000	81377900000	-243977000000	-19052900000	85535200000	-152738000000	28042800000	6476620000	-17723700000	495986000000000
-7.5	746184000000	231532000000	-97623400000	79313100000	25259100000	3184900000000	-95461200000	-174205000000	-21002700000	27633700000	499794000000000
-7.25	117344000000	164592000000	9777380000	-82331700000	32644500000	-889265000000	-66822900000	78604900000	33986500000	-6384350000	502519000000000
-7	80353500000	-250432000000	-124474000000	16451300000	76956500000	1667830000000	276838000000	78604900000	-31349400000	-6384350000	499175000000000
-6.75	-104599000000	-36226100000	-17072800000	-154174000000	-63365000000	-2708230000000	-276838000000	-477578000000	-3824290000	-17723700000	504009000000000
-6.5	24867600000	-237045000000	-43923000000	-127233000000	-41209000000	2981870000000	-57276700000	-73081300000	30547700000	-29063100000	499077000000000
-6.25	117344000000	124429000000	-151324000000	-73351500000	-11667600000	2312860000000	57276700000	331415000000	-17579200000	61651800000	500721000000000
-6	-160085000000	-103166000000	-61823100000	-118253000000	54800500000	-2476090000000	152738000000	28042800000	3114340000	-6384350000	504191000000000
-5.75	-123095000000	-183493000000	18727400000	-28450100000	-33823600000	427793000000	124100000000	-73081300000	-24441400000	-6384350000	500384000000000
-5.5	191325000000	177980000000	54527700000	-37430400000	-55979700000	-1145080000000	-114553000000	179729000000	47817900000	-40402400000	500875000000000
-5.25	209821000000	244920000000	72427800000	133195000000	-26438300000	-3345990000000	-28638400000	-275330000000	-10732300000	16294400000	503826000000000
-5	-326543000000	-210269000000	-70773200000	106254000000	-11667600000	1609740000000	-9546120000	129167000000	27124300000	61651800000	495494000000000
-4.75	-160085000000	-89777700000	-52873100000	-243977000000	-4282260000	-1293620000000	-133646000000	-275330000000	-89792600000	-51741800000	505582000000000
-4.5	-49113600000	-89777700000	81377900000	-226016000000	25259100000	2136410000000	-47730600000	230291000000	-45073800000	50312500000	500566000000000
-4.25	-86104200000	-129941000000	-169224000000	-118253000000	-19052900000	-3675170000000	0	-275330000000	-7263020000	-17723700000	502604000000000
-4	-49113600000	-116553000000	-43923000000	151155000000	-85521100000	-2296110000000	76369000000	-224768000000	-31349400000	-29063100000	501367000000000
-3.75	209821000000	17325500000	-34972900000	-172134000000	-11667600000	93004700000	114553000000	-22519200000	-34803500000	27633700000	501058000000000
-3.5	-215571000000	44101300000	-70773200000	70332900000	3103090000	987020000000	-133646000000	78604900000	-24426100000	-6384350000	500707000000000
-3.25	-12123000000	-317372000000	9777380000	70332900000	3103090000	-1752420000000	-57276700000	78604900000	-27864800000	38973100000	500847000000000
-3	-382029000000	57489200000	81377900000	-208056000000	54800500000	-1976790000000	9546120000	331415000000	-24441400000	4955010000	501086000000000
-2.75	357783000000	137817000000	-88673300000	-19469800000	47415200000	-1542750000000	-181376000000	129167000000	13338800000	16294400000	501395000000000
-2.5	135839000000	-210269000000	-115524000000	115234000000	3103090000	-913529000000	-9546120000	-174205000000	16792800000	4955010000	497152000000000
-2.25	154335000000	137817000000	81377900000	70332900000	-63365000000	-891624000000	-9546120000	-376454000000	-10640600000	-40402400000	496492000000000
-2	-308048000000	124429000000	-34972900000	-55390900000	-48594300000	346478000000	47730600000	-376454000000	51164900000	-17723700000	500285000000000
-1.75	-123095000000	-49614000000	-70773200000	16451300000	-70750400000	-839072000000	-124100000000	230291000000	-34788200000	-29063100000	503306000000000
-1.5	24867600000	-237045000000	-17072800000	-1509290000	-11667600000	-3856230000000	66822900000	28042800000	-3839580000	4955010000	502463000000000
-1.25	228316000000	-223657000000	-88673300000	-279898000000	-4282260000	45264500000	-105007000000	-73081300000	-41604500000	-40402400000	497939000000000
-1	228316000000	17325500000	36627600000	-127233000000	17873800000	1815120000000	-181376000000	-325892000000	13400000000	16294400000	498627000000000
-0.75	-345038000000	-143329000000	-52873100000	-234996000000	-26438300000	-1181650000000	-66822900000	331415000000	-431429000	-17723700000	496337000000000
-0.5	672203000000	4984230000000	698932000000	1884350000000	409297000000	13544100000000	1470100000000	280853000000	89098000000	84330500000	490520000000000
-0.25	265307000000	2842170000000	537831000000	1300630000000	335444000000	13431500000000	1040530000000	-73081300000	133771000000	38973100000	482652000000000
0	579727000000	2427150000000	305129000000	1318590000000	328058000000	15864200000000	773236000000	533664000000	68435000000	16294400000	483298000000000
0.25	505746000000	2159390000000	439380000000	1812510000000	379756000000	12330800000000	620498000000	533664000000	27246600000	4955010000	482792000000000
0.5	505746000000	1931790000000	287229000000	1507180000000	379756000000	11827800000000	649136000000	533664000000	116577000000	16294400000	482792000000000
0.75	80353500000	1864860000000	135078000000	1498200000000	254205000000	17305800000000	735051000000	381977000000	126924000000	72991200000	479645000000000
1	357783000000	1878240000000	269329000000	1246750000000	387141000000	14845400000000	563221000000	432539000000	89067400000	95669900000	480221000000000
1.25	635213000000	1476610000000	197729000000	1085100000000	446224000000	13459400000000	572767000000	1039280000000	99383600000	95669900000	483902000000000
1.5	487250000000	1048190000000	197729000000	1327570000000	291132000000	12127700000000	429575000000	280853000000	-370263000	61651800000	483214000000000
1.75	43362900000	847375000000	72427800000	1453290000000	335444000000	12123900000000	467760000000	432539000000	34001800000	50312500000	486094000000000
2	246811000000	1249010000000	242479000000	1040200000000	460994000000	13994700000000	353206000000	1089850000000	13384700000	27633700000	483804000000000
2.25	283802000000	1249010000000	224579000000	1552080000000	350214000000	10494300000000	477306000000	786474000000	44363800000	61651800000	483593000000000
2.5	191325000000	860763000000	260379000000	1219810000000	364985000000	12593900000000	391391000000	1494340000000	47863700000	107009000000	485799000000000
2.75	117344000000	1168680000000	403580000000	1067140000000	364985000000	14567000000000	372299000000	988722000000	6568370000	61651800000	484928000000000
3	-252562000000	900927000000	269329000000	1345530000000	305902000000	6243610000000	391391000000	1039280000000	78735900000	50312500000	484928000000000
3.25	-197076000000	793823000000	81377900000	1300630000000	298517000000	11469500000000	381845000000	1089850000000	-10640600000	84330500000	484478000000000
3.5	-67608900000	833987000000	152978000000	1318590000000	394526000000	13666600000000	505944000000	1292090000000	95944800000	61651800000	479561000000000
3.75	357783000000	659945000000	117178000000	1453290000000	291132000000	11446600000000	601406000000	1190970000000	23746700000	107009000000	487022000000000
4	542736000000	432350000000	314080000000	1058160000000	438838000000	11845000000000	353206000000	1595470000000	-7232440000	50312500000	485659000000000
4.25	413269000000	352023000000	224579000000	1192870000000	261590000000	12620300000000	630044000000	1797720000000	13415300000	16294400000	483888000000000
4.5	-160085000000	820599000000	27677500000	1040200000000	305902000000	12334100000000	381845000000	1393220000000	95975400000	50312500000	485701000000000
4.75	80353500000	124429000000	188779000000	1040200000000	320673000000	10145600000000	486852000000	1190970000000	-3793700000	16294400000	485448000000000
5	394774000000	499290000000	9777380000	986320000000	180351000000	11683500000000	410483000000	2151650000000	-38119900000	27633700000	482441000000000
5.25	320792000000	579617000000	-17072800000	1013260000000	202507000000	11646100000000	152738000000	1292090000000	37440500000	16294400000	483495000000000
5.5	302297000000	271696000000	144028000000	1165930000000	328058000000	10793100000000	276838000000	1595470000000	-52027700000	-6384350000	485897000000000
5.75	339288000000	445738000000	81377900000	1130000000000	313288000000	12414800000000	400937000000	1393220000000	99414200000	50312500000	484268000000000
6	487250000000	231532000000	278279000000	1354510000000	394526000000	13092200000000	257745000000	1797720000000	40971000000	16294400000	484577000000000
6.25	61858200000	231532000000	152978000000	932439000000	291132000000	13074500000000	420029000000	1898840000000	20338600000	61651800000	487401000000000
6.5	357783000000	579617000000	126128000000	986320000000	283746000000	12891700000000	448668000000	1393220000000	3068470000	-17723700000	484001000000000
6.75	450260000000	673332000000	242479000000	1210830000000	357600000000	5770940000000	563221000000	2151650000000	-17502800000	27633700000	486221000000000
7	135839000000	459126000000	179829000000	1103060000000	387141000000	14190200000000	420029000000	1696590000000	58210500000	107009000000	479448000000000
7.25	98848800000	566229000000	54527700000	1228790000000	446224000000	10507600000000	267291000000	1747150000000	-7232440000	16294400000	486867000000000
7.5	209821000000	405574000000	63477800000	1246750000000	232049000000	8116120000000	505944000000	1595470000000	64996200000	61651800000	488370000000000
7.75	80353500000	151204000000	81377900000	1067140000000	254205000000	9966400000000	248199000000	2404460000000	65118600000	-17723700000	486291000000000
8	61858200000	271696000000	144028000000	1040200000000	350214000000	11077100000000	286384000000	1544910000000	47802600000	4955010000	486516000000000
8.25	579727000000	311859000000	126128000000	797735000000	320673000000	11950000000000	448668000000	2151650000000	3099050000	4955010000	484844000000000
8.5	-252562000000	365411000000	-34972900000	716912000000	305902000000	13517600000000	190922000000	2202210000000	51317800000	38973100000	479223000000000
8.75	154335000000	606393000000	108228000000	878557000000	283746000000	11777900000000	210015000000	1898840000000	16823400000	-6384350000	483340000000000
9	-86104200000	526066000000	81377900000	986320000000	268976000000	14841300000000	219561000000	2556150000000	75312400000	84330500000	484141000000000
9.25	561231000000	512678000000	99278000000	1138990000000	254205000000	10202900000000	391391000000	2657270000000	3068470000	4955010000	482750000000000
9.5	154335000000	539453000000	54527700000	986320000000	209893000000	6452390000000	544129000000	2606710000000	23685600000	-6384350000	486221000000000
9.75	61858200000	566229000000	99278000000	1147970000000	394526000000	12971000000000	305476000000	2657270000000	47802600000	-29063100000	486628000000000
10	413269000000	285083000000	81377900000	986320000000	320673000000	8367770000000	534583000000	2151650000000	54680000000	50312500000	487851000000000
10.25	-437515000000	97652900000	144028000000	878557000000	305902000000	10913400000000	95461200000	2101090000000	20292700000	38973100000	484591000000000
10.5	357783000000	285083000000	-8122750000	1022240000000	335444000000	10626800000000	525037000000	2455020000000	82220500000	16294400000	482596000000000
10.75	-271057000000	124429000000	-26022900000	1165930000000	165581000000	10371500000000	324568000000	2404460000000	-34742300000	95669900000	485996000000000
11	579727000000	191368000000	81377900000	986320000000	224663000000	7621540000000	420029000000	2151650000000	3068470000	27633700000	486712000000000
11.25	376278000000	352023000000	72427800000	1228790000000	136039000000	11717700000000	372299000000	2151650000000	30593600000	61651800000	484563000000000
11.5	-67608900000	-63001900000	827317000	1112040000000	357600000000	9332600000000	372299000000	2505580000000	3144930000	4955010000	484563000000000
11.75	43362900000	445738000000	827317000	1112040000000	239434000000	7652780000000	295930000000	3213450000000	30624200000	27633700000	484886000000000
12	-12123000000	111041000000	135078000000	1103060000000	364985000000	8919850000000	47730600000	2303340000000	78781800000	-6384350000	485673000000000
12.25	154335000000	499290000000	161928000000	959380000000	313288000000	11578700000000	467760000000	2050530000000	58103500000	4955010000	485827000000000
12.5	431764000000	365411000000	108228000000	1228790000000	224663000000	9320040000000	505944000000	2404460000000	20277400000	16294400000	484057000000000
12.75	209821000000	619781000000	-8122750000	1291650000000	409297000000	7826580000000	315022000000	2758390000000	37532300000	50312500000	483663000000000
13	265307000000	311859000000	179829000000	986320000000	268976000000	8451340000000	353206000000	3162890000000	16899900000	38973100000	485518000000000
13.25	468755000000	191368000000	18727400000	1147970000000	320673000000	9740260000000	458214000000	2808960000000	65042100000	16294400000	488019000000000
13.5	191325000000	204756000000	152978000000	977340000000	246819000000	9365930000000	295930000000	2303340000000	40971000000	-29063100000	483818000000000
13.75	283802000000	365411000000	170879000000	1085100000000	276361000000	9763750000000	448668000000	2353900000000	51195400000	27633700000	489382000000000
14	-67608900000	325247000000	27677500000	1121020000000	224663000000	8209110000000	544129000000	2101090000000	16899900000	4955010000	486108000000000
14.25	-215571000000	111041000000	215629000000	1183890000000	313288000000	11546100000000	324568000000	2252770000000	58149400000	27633700000	483354000000000
14.5	487250000000	231532000000	323030000000	1309610000000	217278000000	7009270000000	372299000000	2455020000000	13537600000	61651800000	484127000000000
14.75	-30618300000	311859000000	54527700000	1103060000000	387141000000	8545930000000	353206000000	3213450000000	13384700000	50312500000	488890000000000
15	-419020000000	338635000000	81377900000	1237770000000	232049000000	10185100000000	505944000000	3112330000000	-7171270000	16294400000	480727000000000
15.25	-86104200000	352023000000	18727400000	923459000000	335444000000	9956730000000	362753000000	2808960000000	40986300000	27633700000	484886000000000
15.5	-30618300000	753660000000	18727400000	968360000000	350214000000	9902380000000	448668000000	3162890000000	54725900000	16294400000	485546000000000
15.75	98848800000	298471000000	-26022900000	1291650000000	291132000000	8782420000000	477306000000	3415700000000	20415100000	-17723700000	487724000000000
16	339288000000	70877100000	-34972900000	1165930000000	320673000000	11988900000000	315022000000	2808960000000	61588100000	16294400000	482202000000000
16.25	24867600000	338635000000	-8122750000	1049180000000	261590000000	7691050000000	486852000000	3365140000000	40955700000	61651800000	486698000000000
16.5	-30618300000	271696000000	36627600000	1156950000000	202507000000	6992980000000	534583000000	3264020000000	13491700000	27633700000	482891000000000
16.75	98848800000	-89777700000	188779000000	1112040000000	416682000000	8752300000000	372299000000	2859520000000	37517000000	4955010000	486530000000000
17	-160085000000	365411000000	72427800000	878557000000	121269000000	11654700000000	677775000000	3971880000000	34093500000	27633700000	483172000000000
17.25	135839000000	432350000000	108228000000	1112040000000	246819000000	4504330000000	353206000000	3213450000000	-3717250000	27633700000	490478000000000
17.5	98848800000	405574000000	72427800000	1085100000000	328058000000	6680990000000	286384000000	3011210000000	-14094600000	-6384350000	485771000000000
17.75	-49113600000	432350000000	72427800000	1138990000000	209893000000	11933000000000	572767000000	2910080000000	-263221000	4955010000	484450000000000
18	-308048000000	459126000000	81377900000	1031220000000	335444000000	6441530000000	458214000000	3061770000000	6568370000	-6384350000	486600000000000
18.25	302297000000	539453000000	179829000000	1318590000000	246819000000	4377730000000	505944000000	3264020000000	23762000000	84330500000	484928000000000
18.5	635213000000	365411000000	206679000000	1049180000000	283746000000	6676260000000	572767000000	2707830000000	-293805000	-6384350000	486923000000000
18.75	-160085000000	566229000000	63477800000	923459000000	276361000000	8418380000000	496398000000	3314580000000	-217346000	38973100000	482849000000000
19	-30618300000	579617000000	90328000000	878557000000	364985000000	5241300000000	410483000000	3415700000000	82312200000	4955010000	480811000000000
19.25	135839000000	271696000000	-79723300000	1156950000000	239434000000	9419220000000	420029000000	3011210000000	-10564100000	27633700000	483804000000000
19.5	-30618300000	593005000000	152978000000	1138990000000	261590000000	3964790000000	353206000000	3213450000000	30654800000	-6384350000	485940000000000
19.75	43362900000	552841000000	54527700000	878557000000	239434000000	7811680000000	582313000000	2606710000000	37578100000	-17723700000	484352000000000
20	302297000000	606393000000	269329000000	1147970000000	357600000000	9344270000000	458214000000	3617950000000	17022200000	50312500000	482202000000000
20.25	6372330000	378799000000	144028000000	1058160000000	261590000000	10294200000000	534583000000	4224700000000	-7125400000	-51741800000	485588000000000
20.5	228316000000	566229000000	206679000000	1156950000000	305902000000	5049840000000	248199000000	3011210000000	54756500000	-17723700000	486094000000000
20.75	-252562000000	218144000000	117178000000	923459000000	276361000000	9275520000000	544129000000	2455020000000	27384300000	38973100000	482610000000000
21	-123095000000	807211000000	18727400000	1219810000000	342829000000	9031320000000	486852000000	3870760000000	27246600000	-17723700000	480980000000000
21.25	-30618300000	807211000000	144028000000	806715000000	401912000000	11943600000000	677775000000	2859520000000	47863700000	-17723700000	479125000000000
21.5	246811000000	526066000000	-115524000000	815695000000	209893000000	5160460000000	372299000000	3668510000000	34154700000	4955010000	489368000000000
21.75	-12123000000	767048000000	117178000000	1282670000000	342829000000	8401200000000	372299000000	4073010000000	41001600000	72991200000	482357000000000
22	228316000000	338635000000	72427800000	869577000000	246819000000	8247050000000	372299000000	3567390000000	113261000000	27633700000	485350000000000
22.25	172830000000	673332000000	90328000000	1094080000000	283746000000	9890760000000	305476000000	3264020000000	20353900000	4955010000	485532000000000
22.5	376278000000	793823000000	36627600000	1174910000000	291132000000	9106270000000	572767000000	4932560000000	78781800000	-17723700000	482582000000000
22.75	561231000000	459126000000	90328000000	842636000000	268976000000	10534800000000	324568000000	3365140000000	85705100000	50312500000	482975000000000
23	579727000000	793823000000	188779000000	950399000000	379756000000	7220020000000	515491000000	4022450000000	27277200000	16294400000	487640000000000
23.25	-67608900000	619781000000	81377900000	1031220000000	409297000000	8019520000000	582313000000	4022450000000	109868000000	61651800000	485153000000000
23.5	376278000000	459126000000	188779000000	1085100000000	187737000000	7290790000000	229107000000	3314580000000	6553080000	61651800000	487078000000000
23.75	80353500000	271696000000	-17072800000	1067140000000	313288000000	5302240000000	505944000000	2910080000000	51394200000	61651800000	485968000000000
24	468755000000	807211000000	135078000000	896518000000	364985000000	5039680000000	286384000000	3769640000000	58271700000	-40402400000	485631000000000
24.25	-30618300000	593005000000	18727400000	1031220000000	298517000000	7603040000000	715959000000	4123570000000	44363800000	16294400000	485532000000000
24.5	191325000000	740272000000	170879000000	1040200000000	350214000000	8510750000000	362753000000	3769640000000	6614240000	-63081100000	486277000000000
24.75	-86104200000	673332000000	224579000000	680991000000	298517000000	5948450000000	496398000000	3567390000000	-17426300000	61651800000	482118000000000
25	246811000000	767048000000	90328000000	860597000000	364985000000	5144480000000	601406000000	3921320000000	96067200000	-17723700000	487092000000000
25.25	283802000000	753660000000	135078000000	905498000000	261590000000	5942130000000	467760000000	3365140000000	20369200000	50312500000	481247000000000
25.5	24867600000	900927000000	-34972900000	1085100000000	246819000000	7963010000000	534583000000	4224700000000	41093300000	-17723700000	483495000000000
25.75	-49113600000	954478000000	827317000	1318590000000	364985000000	6399990000000	553675000000	4578630000000	41093300000	-17723700000	485490000000000
26	283802000000	753660000000	-52873100000	878557000000	283746000000	7801330000000	630044000000	3820200000000	96128300000	-29063100000	483790000000000
26.25	135839000000	914315000000	144028000000	986320000000	298517000000	8491320000000	630044000000	4679750000000	102929000000	4955010000	488216000000000
26.5	61858200000	820599000000	9777380000	959380000000	342829000000	4214980000000	429575000000	4730320000000	17083400000	50312500000	485869000000000
26.75	6372330000	874151000000	36627600000	1138990000000	320673000000	6815020000000	429575000000	3061770000000	96036600000	-6384350000	485560000000000
27	468755000000	579617000000	170879000000	1130000000000	512692000000	2217490000000	677775000000	5084250000000	27277200000	-17723700000	489733000000000
27.25	357783000000	887539000000	99278000000	878557000000	357600000000	9730010000000	515491000000	4123570000000	61741000000	-17723700000	482708000000000
27.5	320792000000	700108000000	233529000000	1138990000000	232049000000	7703980000000	515491000000	4528070000000	-27696600000	84330500000	483790000000000
27.75	172830000000	700108000000	90328000000	995301000000	268976000000	6948400000000	610952000000	4022450000000	92643700000	27633700000	480207000000000
28	413269000000	459126000000	117178000000	824676000000	357600000000	6193140000000	715959000000	4730320000000	47924900000	16294400000	479195000000000
28.25	635213000000	740272000000	827317000	896518000000	387141000000	8781270000000	496398000000	4275260000000	51394200000	-40402400000	483523000000000
28.5	-215571000000	967866000000	63477800000	1049180000000	246819000000	7010650000000	610952000000	3314580000000	65240900000	84330500000	482441000000000
28.75	154335000000	1115130000000	206679000000	806715000000	372370000000	7878590000000	448668000000	3668510000000	17022200000	-6384350000	480586000000000
29	61858200000	673332000000	90328000000	797735000000	276361000000	5961220000000	582313000000	4376380000000	58332900000	16294400000	486333000000000
29.25	154335000000	686720000000	126128000000	995301000000	291132000000	7296900000000	610952000000	4882000000000	137500000000	-17723700000	484240000000000
29.5	339288000000	1155300000000	45577600000	761814000000	328058000000	6341840000000	429575000000	3870760000000	75648900000	16294400000	484183000000000
29.75	24867600000	753660000000	179829000000	986320000000	313288000000	8376140000000	448668000000	4376380000000	54771800000	4955010000	482582000000000
30	6372330000	1409670000000	81377900000	1013260000000	379756000000	7262050000000	639590000000	3870760000000	127108000000	-6384350000	484197000000000
30.25	228316000000	1048190000000	170879000000	609149000000	305902000000	9887210000000	544129000000	4831440000000	54863500000	16294400000	481289000000000
30.5	80353500000	686720000000	144028000000	1022240000000	372370000000	6764190000000	563221000000	4275260000000	20369200000	-6384350000	483242000000000
30.75	357783000000	1088360000000	287229000000	815695000000	350214000000	5191430000000	897335000000	4022450000000	92781400000	27633700000	482596000000000
31	-86104200000	1436440000000	45577600000	779774000000	165581000000	7856890000000	420029000000	3567390000000	41139200000	4955010000	484956000000000
31.25	-104599000000	700108000000	188779000000	1022240000000	387141000000	9711270000000	534583000000	3466260000000	103006000000	-51741800000	483804000000000
31.5	-234067000000	619781000000	126128000000	1228790000000	350214000000	5172240000000	668229000000	5235940000000	103052000000	16294400000	482258000000000
31.75	117344000000	1061580000000	161928000000	851616000000	291132000000	4272940000000	563221000000	4174130000000	-14002900000	27633700000	487078000000000
32	394774000000	860763000000	170879000000	1031220000000	394526000000	3741230000000	610952000000	4983130000000	116730000000	-6384350000	484197000000000
32.25	-104599000000	874151000000	108228000000	645070000000	298517000000	8754310000000	563221000000	4882000000000	30716000000	-6384350000	482764000000000
32.5	246811000000	1115130000000	206679000000	1004280000000	195122000000	9122980000000	754144000000	4275260000000	175158000000	38973100000	478029000000000
32.75	209821000000	1556930000000	117178000000	716912000000	320673000000	6729270000000	515491000000	3314580000000	68725500000	-29063100000	481963000000000
33	-49113600000	753660000000	161928000000	797735000000	438838000000	6135780000000	601406000000	5337060000000	44593200000	38973100000	485504000000000
33.25	394774000000	1008030000000	144028000000	707932000000	520077000000	8541920000000	725505000000	4578630000000	99429400000	72991200000	479603000000000
33.5	690699000000	1128520000000	90328000000	896518000000	342829000000	6591650000000	792328000000	4376380000000	30654800000	38973100000	483916000000000
33.75	-67608900000	1061580000000	-34972900000	923459000000	350214000000	5589410000000	773236000000	4275260000000	61695100000	61651800000	481036000000000
34	579727000000	1423050000000	251429000000	851616000000	387141000000	6137730000000	677775000000	5286500000000	20537400000	-29063100000	484113000000000
34.25	98848800000	994642000000	90328000000	1022240000000	387141000000	7587330000000	534583000000	5185370000000	102991000000	16294400000	488202000000000
34.5	191325000000	1115130000000	99278000000	1246750000000	364985000000	6944940000000	477306000000	4174130000000	-3518450000	38973100000	484422000000000
34.75	80353500000	1489990000000	251429000000	914478000000	254205000000	7049230000000	525037000000	4426940000000	51440100000	-17723700000	483214000000000
35	-30618300000	1168680000000	18727400000	689972000000	424068000000	4551540000000	744597000000	4629190000000	120169000000	38973100000	487317000000000
35.25	-12123000000	1409670000000	36627600000	842636000000	320673000000	4362020000000	563221000000	4932560000000	54817700000	-17723700000	487598000000000
35.5	413269000000	1423050000000	170879000000	1013260000000	350214000000	6378070000000	563221000000	3567390000000	30761800000	-29063100000	482539000000000
35.75	246811000000	1235620000000	126128000000	1076120000000	350214000000	8249050000000	544129000000	4831440000000	75618300000	-51741800000	481584000000000
36	-104599000000	981254000000	170879000000	1049180000000	342829000000	5908570000000	668229000000	3769640000000	61664600000	38973100000	487879000000000
36.25	524241000000	1249010000000	269329000000	887537000000	291132000000	6231990000000	295930000000	4325820000000	61786900000	107009000000	484914000000000
36.5	-215571000000	1168680000000	126128000000	1040200000000	283746000000	4726220000000	591860000000	5286500000000	109944000000	-40402400000	485350000000000
36.75	98848800000	1905020000000	99278000000	815695000000	357600000000	8247720000000	505944000000	4477510000000	99689400000	61651800000	480895000000000
37	283802000000	1208850000000	90328000000	815695000000	364985000000	3080730000000	754144000000	3820200000000	54848300000	4955010000	483045000000000
37.25	505746000000	1717590000000	-178174000000	1210830000000	394526000000	3418490000000	820966000000	4831440000000	92781400000	50312500000	482708000000000
37.5	265307000000	1302560000000	27677500000	627110000000	335444000000	6880230000000	868697000000	4477510000000	61756300000	4955010000	484521000000000
37.75	339288000000	1530160000000	224579000000	1067140000000	320673000000	5369470000000	696867000000	5539310000000	44593200000	50312500000	484773000000000
38	413269000000	1289180000000	170879000000	842636000000	291132000000	4112830000000	773236000000	4123570000000	89250900000	61651800000	485785000000000
38.25	-104599000000	1141910000000	90328000000	779774000000	224663000000	5502810000000	887789000000	4528070000000	-10564100000	38973100000	485406000000000
38.5	-30618300000	1141910000000	144028000000	995301000000	446224000000	4478310000000	658682000000	4174130000000	72026600000	38973100000	486600000000000
38.75	228316000000	1409670000000	260379000000	1183890000000	313288000000	7076120000000	591860000000	3365140000000	79041700000	-29063100000	482736000000000
39	505746000000	1396280000000	152978000000	842636000000	283746000000	6216900000000	649136000000	4831440000000	41200400000	61651800000	485504000000000
39.25	-30618300000	1851470000000	197729000000	1067140000000	431453000000	3954550000000	820966000000	4325820000000	82373400000	16294400000	484240000000000
39.5	376278000000	1342730000000	260379000000	1103060000000	416682000000	8389280000000	515491000000	4325820000000	96067200000	16294400000	483382000000000
39.75	-178581000000	1168680000000	45577600000	1049180000000	379756000000	5397900000000	591860000000	3668510000000	65256200000	-40402400000	488694000000000
40	-123095000000	2092450000000	260379000000	1156950000000	409297000000	3457340000000	400937000000	4477510000000	85888600000	-17723700000	488427000000000
40.25	468755000000	1556930000000	126128000000	950399000000	372370000000	6308130000000	658682000000	4780880000000	30792400000	72991200000	484731000000000
40.5	117344000000	1369500000000	54527700000	1121020000000	475765000000	4103740000000	715959000000	4629190000000	92903700000	-17723700000	484675000000000
40.75	-12123000000	1543550000000	108228000000	941419000000	387141000000	2537470000000	582313000000	4224700000000	51363600000	-17723700000	481387000000000
41	283802000000	1503380000000	179829000000	1031220000000	438838000000	5572890000000	639590000000	3567390000000	65149200000	38973100000	485687000000000
41.25	-160085000000	1436440000000	215629000000	932439000000	387141000000	4095600000000	553675000000	4376380000000	13583500000	27633700000	487668000000000
41.5	-326543000000	1449830000000	54527700000	968360000000	387141000000	4749960000000	677775000000	5893240000000	55062300000	-63081100000	484436000000000
41.75	-345038000000	1369500000000	-43923000000	824676000000	401912000000	4700850000000	467760000000	4376380000000	113322000000	-6384350000	486614000000000
42	117344000000	1530160000000	251429000000	1067140000000	387141000000	1048510000000	620498000000	4629190000000	106582000000	27633700000	485729000000000
42.25	-104599000000	1489990000000	206679000000	896518000000	305902000000	4219850000000	878243000000	3112330000000	113460000000	-6384350000	487190000000000
42.5	154335000000	1744360000000	215629000000	914478000000	357600000000	6177500000000	553675000000	3567390000000	37669900000	-17723700000	483101000000000
42.75	450260000000	1811300000000	170879000000	1058160000000	497921000000	5915500000000	916428000000	4882000000000	154617000000	50312500000	483059000000000
43	135839000000	1155300000000	54527700000	1165930000000	424068000000	4661080000000	801874000000	4275260000000	85842700000	27633700000	487626000000000
43.25	98848800000	1369500000000	170879000000	905498000000	416682000000	7277880000000	591860000000	4730320000000	20568000000	-17723700000	480390000000000
43.5	61858200000	1061580000000	314080000000	770794000000	387141000000	6828000000000	715959000000	4224700000000	37700500000	-63081100000	480277000000000
43.75	431764000000	1182070000000	188779000000	761814000000	195122000000	4674460000000	620498000000	2808960000000	137363000000	4955010000	486150000000000
44	135839000000	1824690000000	197729000000	806715000000	246819000000	7578920000000	687321000000	4325820000000	130607000000	50312500000	486249000000000
44.25	-197076000000	1918410000000	296179000000	743853000000	387141000000	4440530000000	801874000000	3668510000000	20629100000	16294400000	480235000000000
44.5	209821000000	1141910000000	197729000000	806715000000	460994000000	6834560000000	639590000000	5134810000000	20537400000	4955010000	478872000000000
44.75	394774000000	1556930000000	260379000000	1094080000000	460994000000	2547900000000	820966000000	5185370000000	37700500000	16294400000	483186000000000
45	43362900000	1556930000000	152978000000	833656000000	342829000000	2965840000000	744597000000	4780880000000	116929000000	61651800000	485968000000000
45.25	542736000000	1851470000000	296179000000	1004280000000	379756000000	6266060000000	735051000000	4528070000000	137454000000	4955010000	480952000000000
45.5	-30618300000	1597100000000	260379000000	1138990000000	460994000000	3752910000000	486852000000	4730320000000	120199000000	27633700000	485448000000000
45.75	-104599000000	1583710000000	179829000000	1076120000000	298517000000	2666030000000	897335000000	5134810000000	27338400000	50312500000	485546000000000
46	357783000000	1971960000000	251429000000	986320000000	431453000000	5515930000000	715959000000	4376380000000	54878800000	-17723700000	482596000000000
46.25	468755000000	1797920000000	170879000000	1138990000000	527463000000	4492430000000	706413000000	4275260000000	27399600000	61651800000	481907000000000
46.5	302297000000	2373600000000	188779000000	968360000000	571775000000	6179450000000	754144000000	3719070000000	85919200000	-40402400000	481710000000000
46.75	43362900000	2119230000000	135078000000	761814000000	394526000000	4651970000000	964158000000	4983130000000	34231100000	61651800000	482905000000000
47	-12123000000	1757750000000	135078000000	869577000000	490536000000	6354270000000	992797000000	3668510000000	130500000000	4955010000	482216000000000
47.25	-12123000000	1945180000000	152978000000	770794000000	394526000000	2673920000000	630044000000	4275260000000	103021000000	16294400000	484830000000000
47.5	-123095000000	1931790000000	206679000000	1192870000000	453609000000	4183220000000	735051000000	4780880000000	58516400000	-29063100000	485026000000000
47.75	339288000000	2025510000000	296179000000	1201850000000	268976000000	6161600000000	792328000000	4426940000000	113353000000	16294400000	485673000000000
48	-30618300000	1543550000000	305129000000	824676000000	512692000000	3526520000000	773236000000	4022450000000	89327300000	-51741800000	485841000000000
48.25	117344000000	1717590000000	331980000000	1354510000000	424068000000	6252050000000	706413000000	4578630000000	161709000000	50312500000	480895000000000
48.5	320792000000	1931790000000	179829000000	770794000000	401912000000	6963670000000	811420000000	4780880000000	41246200000	27633700000	479715000000000
48.75	117344000000	2320040000000	170879000000	1408390000000	468380000000	3980010000000	715959000000	5235940000000	127199000000	50312500000	487822000000000
49	172830000000	2346820000000	206679000000	1130000000000	364985000000	2736350000000	553675000000	4932560000000	34399400000	50312500000	483551000000000
49.25	24867600000	1838080000000	135078000000	1156950000000	350214000000	3934480000000	649136000000	3820200000000	37731000000	27633700000	484647000000000
49.5	24867600000	2440530000000	144028000000	1345530000000	364985000000	5152670000000	830513000000	5185370000000	75587700000	50312500000	481724000000000
49.75	61858200000	2467310000000	126128000000	1291650000000	394526000000	3700050000000	820966000000	4477510000000	92919000000	-6384350000	479673000000000
50	413269000000	1730980000000	421480000000	1067140000000	483151000000	1641260000000	840059000000	4831440000000	103082000000	16294400000	485406000000000
50.25	61858200000	2052290000000	126128000000	1210830000000	586545000000	2814260000000	630044000000	4022450000000	113460000000	27633700000	485490000000000
50.5	339288000000	2079060000000	251429000000	1130000000000	475765000000	5854120000000	782782000000	3668510000000	85949800000	-6384350000	480081000000000
50.75	24867600000	2172780000000	99278000000	1094080000000	490536000000	3907120000000	1002340000000	4325820000000	61802200000	27633700000	480081000000000
51	135839000000	2360210000000	287229000000	914478000000	453609000000	6880850000000	706413000000	4780880000000	154770000000	27633700000	482441000000000
51.25	302297000000	2119230000000	224579000000	932439000000	468380000000	3772400000000	725505000000	3870760000000	61939800000	72991200000	481134000000000
51.5	191325000000	1998730000000	215629000000	1291650000000	372370000000	5200960000000	859151000000	4224700000000	68817300000	84330500000	481528000000000
51.75	302297000000	1864860000000	224579000000	1453290000000	497921000000	847444000000	735051000000	4174130000000	89373200000	-6384350000	487232000000000
52	191325000000	2534250000000	224579000000	1022240000000	505307000000	2727130000000	658682000000	4780880000000	144561000000	84330500000	483579000000000
52.25	394774000000	2025510000000	278279000000	1112040000000	512692000000	1915070000000	620498000000	4932560000000	89419100000	4955010000	485560000000000
52.5	80353500000	2172780000000	126128000000	914478000000	505307000000	2550300000000	811420000000	3466260000000	120276000000	-6384350000	483228000000000
52.75	-86104200000	2520860000000	296179000000	1453290000000	283746000000	4183910000000	830513000000	4831440000000	137607000000	95669900000	484183000000000
53	265307000000	2400370000000	287229000000	734873000000	542233000000	5207470000000	801874000000	4022450000000	89357900000	-29063100000	482497000000000
53.25	-141590000000	2400370000000	233529000000	1103060000000	520077000000	4803290000000	868697000000	4224700000000	158331000000	-29063100000	482048000000000
53.5	80353500000	2587800000000	108228000000	618129000000	446224000000	2469550000000	668229000000	6247180000000	127077000000	16294400000	483425000000000
53.75	80353500000	2333430000000	233529000000	1130000000000	394526000000	3096130000000	954612000000	3415700000000	144408000000	95669900000	481415000000000
54	-86104200000	2360210000000	260379000000	1112040000000	520077000000	2394810000000	773236000000	4629190000000	175342000000	72991200000	485532000000000
54.25	154335000000	2467310000000	197729000000	1336550000000	468380000000	5605340000000	1040530000000	4831440000000	55031800000	-6384350000	485687000000000
54.5	80353500000	2427150000000	54527700000	1174910000000	542233000000	6829090000000	925974000000	4325820000000	165056000000	50312500000	483242000000000
54.75	-30618300000	2534250000000	349880000000	1094080000000	431453000000	7152310000000	868697000000	4022450000000	140954000000	38973100000	480179000000000
55	61858200000	2386980000000	305129000000	860597000000	616087000000	7304530000000	773236000000	3719070000000	89403800000	4955010000	482188000000000
55.25	117344000000	2279880000000	251429000000	1237770000000	438838000000	5765870000000	715959000000	4932560000000	196020000000	61651800000	481191000000000
55.5	-12123000000	2293270000000	206679000000	905498000000	372370000000	5457090000000	1002340000000	4679750000000	106552000000	4955010000	482132000000000
55.75	154335000000	2775230000000	188779000000	1067140000000	379756000000	1625420000000	859151000000	3921320000000	65103300000	-17723700000	485602000000000
56	394774000000	2159390000000	331980000000	1228790000000	542233000000	3382880000000	582313000000	4831440000000	-3610200000	-6384350000	482272000000000
56.25	487250000000	2601190000000	439380000000	1004280000000	520077000000	5576670000000	763690000000	4528070000000	106689000000	61651800000	484043000000000
56.5	-308048000000	2895720000000	421480000000	1013260000000	394526000000	2435540000000	820966000000	4679750000000	92766100000	16294400000	488623000000000
56.75	376278000000	2574410000000	269329000000	1174910000000	512692000000	1194920000000	754144000000	4932560000000	89281500000	-40402400000	485926000000000
57	357783000000	2922500000000	367780000000	1201850000000	616087000000	5344640000000	906882000000	4123570000000	37884000000	-6384350000	479111000000000
57.25	80353500000	2788620000000	251429000000	1040200000000	401912000000	2696500000000	868697000000	4780880000000	134306000000	61651800000	479715000000000
57.5	191325000000	2346820000000	179829000000	1462270000000	497921000000	2678010000000	1011890000000	3820200000000	172285000000	50312500000	482146000000000
57.75	24867600000	2467310000000	242479000000	1228790000000	505307000000	5171100000000	859151000000	5084250000000	196203000000	-17723700000	481668000000000
58	-160085000000	1958570000000	430430000000	1327570000000	534848000000	3403350000000	754144000000	4932560000000	106750000000	4955010000	485673000000000
58.25	413269000000	2775230000000	117178000000	1300630000000	409297000000	4422790000000	916428000000	4224700000000	130745000000	50312500000	479448000000000
58.5	172830000000	2561030000000	170879000000	1112040000000	527463000000	2533830000000	735051000000	5033690000000	61939800000	27633700000	485504000000000
58.75	-345038000000	2949270000000	278279000000	1156950000000	593931000000	5378940000000	1040530000000	4123570000000	185749000000	61651800000	482469000000000
59	265307000000	3096540000000	502031000000	1201850000000	586545000000	3491160000000	1088260000000	4932560000000	109944000000	72991200000	483130000000000
59.25	450260000000	2079060000000	412530000000	1094080000000	424068000000	4673320000000	1135990000000	4376380000000	216790000000	16294400000	485560000000000
59.5	246811000000	2775230000000	99278000000	1309610000000	468380000000	1486260000000	859151000000	3921320000000	134337000000	50312500000	483158000000000
59.75	209821000000	2761840000000	206679000000	1201850000000	497921000000	5780130000000	840059000000	4578630000000	113628000000	27633700000	478971000000000
60	-30618300000	2159390000000	340930000000	1219810000000	520077000000	1439870000000	1145530000000	3011210000000	165270000000	16294400000	484338000000000

## Sheet: 475K
Time (ms)	m/z 28 Ethene	m/z 30 Formaldehyde	m/z 56 Acrolein	m/z 70 (2,3-DHF & 2,5-DHF)	m/z 86 THF-3-one	m/z 71 ROO	m/z 58 butanedial	m/z 103 OOQOOH	Sum UHP + KHP	m/z 84	m/z 72 THF
-30	493678000000	12370900000	-64989400000	-249133000000	25249700000	-3249900000000	43238300000	187530000000	-17850600000	33732300000	505143000000000
-29.75	-665290000000	-305149000000	70182000000	195956000000	9309590000	515010000000	-80861300000	-280639000000	-28197400000	11053500000	502325000000000
-29.5	353802000000	-74225500000	79837100000	118550000000	-14600600000	2318680000000	-4492290000	135511000000	-10973100000	-11625200000	499250000000000
-29.25	-265646000000	84534600000	-26369000000	-36264100000	-38510900000	-3024170000000	24146100000	-72564000000	-17820000000	33732200000	503840000000000
-29	-245663000000	12370900000	60526900000	-26588300000	17279700000	352192000000	148246000000	-384677000000	74979900000	11053500000	503886000000000
-28.75	34087300000	-204120000000	2596330000	89522000000	57130100000	627244000000	110061000000	239549000000	19944900000	11053500000	495189000000000
-28.5	-345574000000	243295000000	60526900000	-7236570000	-14600600000	-196198000000	90968900000	135511000000	-14396600000	-285866000	502719000000000
-28.25	-85805900000	-261851000000	-74644500000	-152374000000	57130100000	143751000000	157792000000	-436696000000	20021400000	11053500000	497492000000000
-28	-505432000000	214429000000	-16713900000	-297512000000	49160000000	-990230000000	176884000000	83492300000	-24789200000	79089700000	500855000000000
-27.75	94033900000	-59792800000	41216700000	-200754000000	9309590000	433107000000	-71315100000	-124583000000	37092700000	-285866000	500568000000000
-27.5	34087300000	-492775000000	41216700000	99197900000	-14600600000	1928360000000	-42676800000	-176602000000	20021400000	22392900000	495280000000000
-27.25	393767000000	84534600000	21906500000	-55615900000	1339510000	-2093030000000	24146100000	291567000000	6220550000	11053500000	501658000000000
-27	-105788000000	41236400000	-55334300000	-84643500000	41189900000	-1138740000000	90968900000	135511000000	-52222600000	-22964600000	503779000000000
-26.75	34087300000	-377313000000	2596330000	108874000000	-38510900000	-1800200000000	-61769000000	-228620000000	2797110000	-11625200000	499946000000000
-26.5	-165735000000	416487000000	-26369000000	-7236570000	33219800000	-3735090000000	5053830000	-228620000000	13113300000	11053500000	505188000000000
-26.25	733464000000	55669100000	70182000000	-65291700000	9309590000	-617691000000	-23584500000	-228620000000	-31651400000	22392900000	497841000000000
-26	-125770000000	171131000000	89492200000	166929000000	-6630570000	1374370000000	100515000000	83492300000	-14473000000	33732200000	496947000000000
-25.75	-85805900000	156698000000	-64989400000	-162050000000	49160000000	2536480000000	43238300000	395605000000	-45421600000	67750300000	498977000000000
-25.5	153980000000	55669100000	-84299600000	147577000000	25249700000	-971383000000	52784400000	31473600000	-24804500000	113108000000	500143000000000
-25.25	333820000000	171131000000	31561600000	79846200000	-14600600000	-2377430000000	-138138000000	447624000000	44123100000	-285866000	499674000000000
-25	-165735000000	199996000000	-64989400000	12115200000	17279700000	2556670000000	-52222900000	-332658000000	-52207300000	-11625200000	498462000000000
-24.75	-65823700000	243295000000	-36024100000	70170300000	-54451000000	532583000000	24146100000	187530000000	-21243400000	45071600000	499053000000000
-24.5	193945000000	-45360000000	-64989400000	31466900000	41189900000	-368153000000	52784400000	-332658000000	26822400000	33732200000	500386000000000
-24.25	253891000000	41236400000	79837100000	60494500000	-30540800000	-663886000000	43238300000	-488714000000	68178900000	-285866000	498386000000000
-24	-5877120000	-30927300000	-84299600000	60494500000	-22570700000	730613000000	33692200000	291567000000	6189960000	11053500000	498992000000000
-23.75	233909000000	-146389000000	-171195000000	50818600000	57130100000	2187750000000	90968900000	31473600000	30307000000	67750300000	498901000000000
-23.5	-525414000000	-146389000000	79837100000	128225000000	41189900000	958757000000	167338000000	447624000000	-55737800000	-11625200000	497128000000000
-23.25	333820000000	12370900000	-16713900000	-171726000000	33219800000	-934825000000	-109500000000	603680000000	6174670000	33732200000	501840000000000
-23	213927000000	185564000000	-16713900000	137901000000	57130100000	192356000000	-14038400000	-228620000000	54408700000	11053500000	496386000000000
-22.75	-65823700000	185564000000	60526900000	186281000000	-22570700000	-1204270000000	-61769000000	187530000000	71525900000	-285866000	500765000000000
-22.5	14105100000	-276284000000	-45679200000	12115200000	17279700000	-1634060000000	14600000000	187530000000	-4141530000	33732200000	501795000000000
-22.25	133998000000	185564000000	-7058770000	89522000000	65100100000	3448190000000	-119046000000	-280639000000	-24697500000	45071600000	499068000000000
-22	193945000000	55669100000	60526900000	108874000000	-14600600000	-340590000000	-138138000000	-176602000000	-66054000000	-56982700000	496932000000000
-21.75	-5877120000	113400000000	-7058770000	89522000000	-22570700000	2568790000000	-14038400000	-176602000000	-38513600000	11053500000	496765000000000
-21.5	-365557000000	-348447000000	89492200000	-84643500000	-54451000000	-2084040000000	-109500000000	291567000000	-45391000000	-45643300000	499871000000000
-21.25	-25859300000	142266000000	31561600000	2439290000	-54451000000	-966071000000	148246000000	-332658000000	-21304600000	-22964600000	503295000000000
-21	34087300000	-45360000000	31561600000	137901000000	-62421100000	-3325220000000	-71315100000	-384677000000	16582600000	33732200000	505628000000000
-20.75	54069500000	84534600000	166733000000	-84643500000	-46481000000	-930076000000	-4492290000	135511000000	13067400000	22392900000	499613000000000
-20.5	-65823700000	387622000000	79837100000	-113671000000	9309590000	735570000000	-147684000000	31473600000	16475600000	-22964600000	503552000000000
-20.25	193945000000	142266000000	50871800000	215308000000	81040300000	2710140000000	-52222900000	-176602000000	-21274000000	56410900000	496629000000000
-20	-205699000000	55669100000	60526900000	-65291700000	1339510000	1446360000000	129153000000	31473600000	-79732500000	-34303900000	493053000000000
-19.75	34087300000	257727000000	21906500000	-84643500000	-6630570000	215169000000	205522000000	-540733000000	47500600000	-34303900000	498628000000000
-19.5	453713000000	214429000000	-45679200000	224984000000	57130100000	3180590000000	-99953500000	395605000000	-7488510000	-34303900000	495523000000000
-19.25	14105100000	84534600000	50871800000	89522000000	-22570700000	-397841000000	-42676800000	-228620000000	-28258500000	-285866000	501886000000000
-19	-345574000000	-59792800000	137768000000	-55615900000	9309590000	2723310000000	-80861300000	291567000000	9643990000	-34303900000	497644000000000
-18.75	-205699000000	-146389000000	128113000000	-36264100000	-22570700000	-2086370000000	-42676800000	447624000000	-17835300000	-285866000	498068000000000
-18.5	-165735000000	-204120000000	21906500000	31466900000	57130100000	-575958000000	-138138000000	-176602000000	23475400000	-11625200000	497007000000000
-18.25	74051700000	12370900000	12251400000	118550000000	-54451000000	891800000000	14600000000	-540733000000	-59176500000	-285866000	499750000000000
-18	-125770000000	185564000000	2596330000	-152374000000	49160000000	-1661620000000	-109500000000	-332658000000	-11019000000	11053500000	498310000000000
-17.75	-565379000000	142266000000	-7058770000	-191078000000	1339510000	77365000000	138700000000	-228620000000	37153800000	-285866000	495083000000000
-17.5	-25859300000	113400000000	-26369000000	-26588300000	33219800000	-786603000000	-52222900000	-20545200000	-103834000000	33732200000	501431000000000
-17.25	-305610000000	142266000000	31561600000	-94319300000	-70391200000	-312888000000	-176322000000	-72564000000	40577300000	-22964600000	499159000000000
-17	-105788000000	-30927300000	-36024100000	70170300000	73070200000	926091000000	129153000000	31473600000	-21289300000	-22964600000	500749000000000
-16.75	513660000000	-232986000000	-190506000000	-103995000000	41189900000	-820609000000	-157230000000	-332658000000	16521500000	-79661400000	497916000000000
-16.5	74051700000	-2061820000	-171195000000	157253000000	120891000000	278012000000	62330600000	187530000000	44046600000	-285866000	501249000000000
-16.25	173963000000	-45360000000	2596330000	2439290000	104951000000	-1895430000000	-252691000000	-228620000000	-35044200000	-285866000	501901000000000
-16	-245663000000	-45360000000	-171195000000	-123347000000	-38510900000	1324420000000	43238300000	-280639000000	23398900000	-285866000	494386000000000
-15.75	-425503000000	301026000000	21906500000	70170300000	-54451000000	-1478890000000	167338000000	707718000000	-7534380000	45071600000	498750000000000
-15.5	-25859300000	127833000000	-142230000000	-84643500000	-62421100000	1477390000000	24146100000	343586000000	-7488510000	11053500000	498689000000000
-15.25	-285628000000	-175255000000	-209816000000	31466900000	112921000000	2843120000000	119607000000	-228620000000	57771000000	-11625200000	501295000000000
-15	133998000000	185564000000	99147300000	-84643500000	-70391200000	-2560370000000	-71315100000	-280639000000	-28151500000	-22964600000	499386000000000
-14.75	253891000000	-88658200000	-74644500000	-7236570000	25249700000	1198160000000	-14038400000	31473600000	50985200000	22392900000	497644000000000
-14.5	-45841500000	-463909000000	-16713900000	-94319300000	96980400000	636241000000	-185869000000	-436696000000	30261100000	33732200000	496871000000000
-14.25	173963000000	-175255000000	79837100000	-94319300000	-30540800000	86359400000	-4492290000	655699000000	40607900000	-34303900000	500234000000000
-14	14105100000	286593000000	70182000000	70170300000	-22570700000	224804000000	-33130700000	-72564000000	-7534380000	-11625200000	499856000000000
-13.75	353802000000	-377313000000	12251400000	-103995000000	-38510900000	-1063840000000	24146100000	-176602000000	-611044000	-56982700000	500128000000000
-13.5	-425503000000	-348447000000	-64989400000	244336000000	17279700000	249460000000	-90407400000	343586000000	43985400000	-68322000000	499628000000000
-13.25	233909000000	171131000000	-7058770000	79846200000	9309590000	-3400030000000	138700000000	291567000000	23414200000	-22964600000	499977000000000
-13	-65823700000	-319582000000	41216700000	99197900000	-54451000000	-1510920000000	-33130700000	-20545200000	9598110000	-285866000	498447000000000
-12.75	173963000000	-74225500000	253629000000	-103995000000	-62421100000	-1097640000000	24146100000	-384677000000	47531200000	-11625200000	503401000000000
-12.5	14105100000	-362880000000	-64989400000	-103995000000	17279700000	1064110000000	-166776000000	447624000000	-28166800000	67750300000	497204000000000
-12.25	-185717000000	-146389000000	128113000000	273363000000	-54451000000	201210000000	110061000000	343586000000	-17865900000	-285866000	499325000000000
-12	-245663000000	-30927300000	-84299600000	21791000000	-22570700000	-35504500000	-80861300000	-592752000000	44061900000	-56982700000	499204000000000
-11.75	34087300000	-30927300000	99147300000	79846200000	-62421100000	4139140000000	-90407400000	239549000000	9659280000	-11625200000	494614000000000
-11.5	-45841500000	-463909000000	99147300000	-36264100000	-38510900000	799834000000	81422800000	291567000000	-672211000	-34303900000	500537000000000
-11.25	593589000000	113400000000	-64989400000	-55615900000	-46481000000	-1463020000000	-119046000000	-228620000000	6189960000	-34303900000	503628000000000
-11	34087300000	-88658200000	-209816000000	31466900000	41189900000	-744588000000	-71315100000	343586000000	-28182100000	-11625200000	501552000000000
-10.75	14105100000	70101800000	-45679200000	195956000000	-70391200000	1447210000000	-23584500000	-20545200000	19960200000	22392900000	499386000000000
-10.5	133998000000	113400000000	-190506000000	21791000000	17279700000	771777000000	33692200000	-332658000000	33745700000	22392900000	499719000000000
-10.25	74051700000	-290716000000	50871800000	-200754000000	-38510900000	-51306700000	-99953500000	135511000000	-55722500000	-45643300000	502371000000000
-10	-85805900000	41236400000	-16713900000	41142700000	-86331300000	-692796000000	-71315100000	187530000000	-14396600000	-34303900000	501643000000000
-9.75	-105788000000	142266000000	176388000000	-171726000000	57130100000	1955920000000	-119046000000	239549000000	-4141530000	56410900000	495295000000000
-9.5	-85805900000	-117524000000	31561600000	-413623000000	41189900000	-686136000000	119607000000	187530000000	23383600000	-11625200000	501522000000000
-9.25	-105788000000	-247418000000	-55334300000	-239457000000	-14600600000	-1482080000000	205522000000	-176602000000	33699800000	-34303900000	497553000000000
-9	114016000000	-117524000000	-7058770000	-200754000000	-6630570000	276313000000	-23584500000	603680000000	-31620800000	-285866000	498992000000000
-8.75	-105788000000	-59792800000	-55334300000	-191078000000	-38510900000	-383035000000	-23584500000	187530000000	-41967600000	11053500000	504052000000000
-8.5	-5877120000	-117524000000	-36024100000	31466900000	9309590000	2658060000000	186430000000	-228620000000	-28182100000	33732200000	495583000000000
-8.25	14105100000	55669100000	-103610000000	-26588300000	33219800000	632628000000	157792000000	-592752000000	-31574900000	-11625200000	495977000000000
-8	-45841500000	-261851000000	-74644500000	70170300000	-86331300000	2438140000000	-90407400000	-228620000000	2766520000	-22964600000	497371000000000
-7.75	94033900000	257727000000	-151885000000	283039000000	-14600600000	-1697610000000	167338000000	239549000000	30291700000	-68322000000	501992000000000
-7.5	-25859300000	199996000000	31561600000	21791000000	57130100000	117959000000	-61769000000	-124583000000	-4065070000	-22964600000	500840000000000
-7.25	-125770000000	-2061820000	31561600000	-103995000000	-30540800000	-2296520000000	5053830000	-72564000000	-24789200000	11053500000	503295000000000
-7	173963000000	-30927300000	-64989400000	215308000000	-54451000000	-640508000000	14600000000	-280639000000	-656919000	-22964600000	502537000000000
-6.75	-545396000000	26803600000	-64989400000	-26588300000	9309590000	-2126340000000	-128592000000	31473600000	-52268500000	-45643300000	502264000000000
-6.5	114016000000	-348447000000	-45679200000	-432974000000	-6630570000	63759500000	90968900000	-176602000000	-28197400000	67750300000	497841000000000
-6.25	54069500000	-189687000000	41216700000	2439290000	41189900000	235006000000	-128592000000	-592752000000	54378100000	-56982700000	499522000000000
-6	173963000000	272160000000	-16713900000	-171726000000	33219800000	-204277000000	-233599000000	83492300000	-41982900000	-285866000	505007000000000
-5.75	-145752000000	-204120000000	-209816000000	-220105000000	-62421100000	-4632990000000	81422800000	-124583000000	-24773900000	-11625200000	505658000000000
-5.5	34087300000	-189687000000	-55334300000	224984000000	-38510900000	1175630000000	100515000000	551661000000	9598110000	67750300000	499825000000000
-5.25	-125770000000	-189687000000	-7058770000	41142700000	-46481000000	-1961250000000	-128592000000	31473600000	-7549680000	45071600000	504870000000000
-5	293856000000	-59792800000	-113265000000	41142700000	49160000000	-1132710000000	-157230000000	-540733000000	-7519090000	-34303900000	504113000000000
-4.75	-305610000000	12370900000	-84299600000	79846200000	-6630570000	-2800840000000	-23584500000	135511000000	-28166800000	-11625200000	503098000000000
-4.5	153980000000	-45360000000	128113000000	79846200000	-30540800000	-2919160000000	-14038400000	239549000000	-38544100000	22392900000	501855000000000
-4.25	114016000000	199996000000	128113000000	-394271000000	9309590000	1081750000000	52784400000	-176602000000	19975500000	22392900000	498507000000000
-4	-125770000000	-103091000000	-16713900000	331419000000	49160000000	173579000000	-252691000000	187530000000	13128600000	-91000700000	498204000000000
-3.75	-245663000000	-160822000000	60526900000	-123347000000	-38510900000	1135890000000	-61769000000	239549000000	16567300000	-56982700000	496932000000000
-3.5	-5877120000	-348447000000	-93954700000	-210430000000	-6630570000	-370633000000	-61769000000	-20545200000	-4080360000	-91000700000	499840000000000
-3.25	-185717000000	-218553000000	-84299600000	-171726000000	-14600600000	-3283910000000	43238300000	-20545200000	33776300000	-11625200000	501628000000000
-3	-65823700000	-59792800000	-7058770000	-258809000000	25249700000	-3664100000000	100515000000	135511000000	-672211000	22392900000	503158000000000
-2.75	-465468000000	-261851000000	41216700000	60494500000	1339510000	1788210000000	110061000000	135511000000	-4095650000	-22964600000	500340000000000
-2.5	-245663000000	228862000000	-74644500000	166929000000	-46481000000	1102650000000	5053830000	135511000000	40607900000	33732200000	498644000000000
-2.25	433731000000	171131000000	60526900000	-307188000000	-22570700000	-315513000000	71876700000	83492300000	-17896500000	22392900000	503340000000000
-2	114016000000	-189687000000	-26369000000	-113671000000	41189900000	-2491500000000	-99953500000	187530000000	-45314600000	-22964600000	502340000000000
-1.75	-65823700000	84534600000	41216700000	-84643500000	-118212000000	-722694000000	14600000000	-436696000000	30245800000	33732200000	499825000000000
-1.5	-5877120000	-30927300000	12251400000	-171726000000	-70391200000	4832700000000	-214507000000	135511000000	23398900000	-285866000	499856000000000
-1.25	-165735000000	-189687000000	108802000000	-94319300000	-62421100000	-3024030000000	-224053000000	-280639000000	-641627000	-11625200000	506052000000000
-1	-5877120000	-16494600000	-151885000000	-220105000000	-118212000000	-3162540000000	-52222900000	343586000000	33715100000	-11625200000	501855000000000
-0.75	133998000000	-146389000000	-64989400000	-45940000000	-14600600000	-1827700000000	71876700000	187530000000	-24789200000	11053500000	501037000000000
-0.5	1233020000000	2956650000000	813625000000	2092430000000	359993000000	12017600000000	1036030000000	291567000000	112989000000	33732200000	487947000000000
-0.25	433731000000	1672140000000	495006000000	1869880000000	280292000000	12369200000000	768744000000	811755000000	30337600000	56410900000	483690000000000
0	273874000000	2191710000000	572247000000	1531230000000	431724000000	12501800000000	444175000000	499643000000	-10988400000	56410900000	482827000000000
0.25	-45841500000	1498940000000	176388000000	1492520000000	256382000000	10872800000000	539637000000	655699000000	6281710000	-285866000	485160000000000
0.5	613571000000	1296880000000	321215000000	1560250000000	248412000000	11781500000000	549183000000	395605000000	23398900000	67750300000	483902000000000
0.75	-105788000000	1470080000000	224664000000	1618310000000	336083000000	14177100000000	472814000000	1383960000000	47470000000	22392900000	484523000000000
1	573607000000	1455640000000	282594000000	1744090000000	328113000000	14252000000000	587367000000	1071850000000	102612000000	45071600000	480872000000000
1.25	353802000000	1729870000000	301904000000	1666690000000	328113000000	11551800000000	520544000000	1227910000000	81933800000	-285866000	484614000000000
1.5	593589000000	1094830000000	147423000000	1753770000000	415784000000	13450200000000	453722000000	1488000000000	54316900000	90429000000	482251000000000
1.75	-5877120000	1152560000000	427421000000	2160160000000	399843000000	10709900000000	539637000000	1696070000000	54286300000	33732200000	485614000000000
2	-5877120000	1470080000000	408111000000	1647340000000	280292000000	10048400000000	520544000000	1904150000000	133591000000	67750300000	484145000000000
2.25	333820000000	921633000000	176388000000	1995670000000	320143000000	13112400000000	491906000000	2164240000000	109474000000	67750300000	480130000000000
2.5	-165735000000	762873000000	272939000000	1705390000000	288262000000	11250500000000	434629000000	2216260000000	57847400000	147126000000	479615000000000
2.75	393767000000	1138120000000	234319000000	1453820000000	264352000000	10074000000000	348714000000	2996540000000	37230300000	124447000000	484417000000000
3	14105100000	892768000000	282594000000	1686040000000	320143000000	10199500000000	472814000000	2476360000000	40653700000	33732200000	483978000000000
3.25	413749000000	531949000000	427421000000	1415110000000	304202000000	11091200000000	367806000000	3984900000000	-4141530000	33732200000	484432000000000
3.5	-5877120000	647411000000	215009000000	1773120000000	383903000000	10739800000000	281891000000	3724810000000	13082700000	11053500000	487432000000000
3.75	-165735000000	1152560000000	70182000000	1608630000000	296232000000	11053100000000	463268000000	3724810000000	109459000000	79089700000	478115000000000
4	-25859300000	777306000000	21906500000	1444140000000	312173000000	8890170000000	491906000000	2944530000000	71602300000	147126000000	483963000000000
4.25	213927000000	402055000000	272939000000	1608630000000	383903000000	8312160000000	549183000000	4297010000000	109505000000	11053500000	485402000000000
4.5	253891000000	517517000000	205353000000	1598960000000	383903000000	9038960000000	358260000000	3672790000000	102566000000	67750300000	481993000000000
4.75	313838000000	748440000000	147423000000	1560250000000	391873000000	8035630000000	663736000000	3048560000000	19990800000	79089700000	481281000000000
5	593589000000	402055000000	176388000000	1976310000000	487514000000	11478700000000	425083000000	3516730000000	-14396600000	56410900000	477751000000000
5.25	-165735000000	575248000000	224664000000	1569930000000	447664000000	9293100000000	348714000000	4140960000000	37199700000	33732200000	487038000000000
5.5	233909000000	329891000000	147423000000	1637660000000	344053000000	8683280000000	692375000000	3776830000000	23460100000	124447000000	484554000000000
5.75	313838000000	387622000000	118458000000	1502200000000	383903000000	9343550000000	568275000000	4505090000000	37260900000	-34303900000	483463000000000
6	333820000000	517517000000	186043000000	1540900000000	399843000000	7431690000000	482360000000	4713160000000	33822200000	56410900000	487326000000000
6.25	173963000000	228862000000	195698000000	1492520000000	415784000000	8700640000000	310530000000	4765180000000	40653700000	79089700000	484902000000000
6.5	114016000000	-2061820000	379145000000	1463490000000	391873000000	10852100000000	501452000000	4088940000000	2888860000	33732200000	481402000000000
6.75	273874000000	719575000000	60526900000	1250630000000	232472000000	7166420000000	396445000000	4192980000000	54439300000	101768000000	485584000000000
7	433731000000	344324000000	186043000000	1695710000000	423754000000	8414470000000	501452000000	4401050000000	44276000000	22392900000	486493000000000
7.25	-325592000000	560815000000	89492200000	1521550000000	567215000000	8514800000000	701921000000	4817200000000	109505000000	67750300000	484372000000000
7.5	513660000000	474218000000	-16713900000	1927940000000	200591000000	12039200000000	539637000000	4401050000000	85525500000	-34303900000	481796000000000
7.75	153980000000	589680000000	108802000000	1840850000000	304202000000	7193770000000	510998000000	4609130000000	30307000000	22392900000	485751000000000
8	573607000000	344324000000	-7058770000	1589280000000	479544000000	8990850000000	434629000000	4140960000000	44123100000	79089700000	483902000000000
8.25	333820000000	503084000000	215009000000	1299000000000	431724000000	2573890000000	682828000000	5233350000000	109444000000	-285866000	489659000000000
8.5	193945000000	228862000000	99147300000	1618310000000	344053000000	6360630000000	453722000000	4661150000000	33868000000	79089700000	484008000000000
8.75	273874000000	618546000000	176388000000	1269980000000	256382000000	7243080000000	635098000000	4505090000000	106097000000	67750300000	485296000000000
9	293856000000	373189000000	108802000000	1579600000000	519395000000	7372250000000	386899000000	5077300000000	130153000000	11053500000	485751000000000
9.25	94033900000	430920000000	195698000000	1453820000000	320143000000	5304440000000	616006000000	5441430000000	44061900000	-68322000000	483963000000000
9.5	693500000000	835037000000	243974000000	1811830000000	447664000000	5889680000000	596913000000	5181330000000	57939200000	67750300000	487781000000000
9.75	253891000000	647411000000	147423000000	1144190000000	280292000000	8067300000000	654190000000	5545460000000	81979700000	56410900000	482993000000000
10	153980000000	387622000000	2596330000	1473170000000	391873000000	7301180000000	568275000000	6013630000000	54561600000	11053500000	483205000000000
10.25	-205699000000	12370900000	70182000000	1376410000000	359993000000	2575730000000	644644000000	4921240000000	13174500000	79089700000	490659000000000
10.5	213927000000	474218000000	157078000000	1182890000000	312173000000	5591040000000	482360000000	6637860000000	106081000000	-34303900000	485538000000000
10.75	74051700000	604113000000	243974000000	1618310000000	439694000000	7141620000000	701921000000	6065650000000	82086800000	113108000000	487069000000000
11	273874000000	748440000000	-26369000000	1502200000000	304202000000	7259800000000	616006000000	5597480000000	40760800000	11053500000	486099000000000
11.25	253891000000	387622000000	60526900000	1231270000000	471574000000	4109600000000	654190000000	6481800000000	-14350700000	124447000000	484448000000000
11.5	233909000000	-30927300000	21906500000	1444140000000	383903000000	7182720000000	806928000000	6013630000000	51107600000	56410900000	486690000000000
11.75	-65823700000	430920000000	176388000000	1124840000000	328113000000	6458260000000	596913000000	6793920000000	106219000000	79089700000	484963000000000
12	74051700000	286593000000	166733000000	1095810000000	479544000000	6904830000000	892843000000	6169690000000	126836000000	33732200000	489311000000000
12.25	193945000000	430920000000	31561600000	1598960000000	463604000000	4013670000000	787836000000	6585840000000	71801100000	101768000000	485751000000000
12.5	-405521000000	358757000000	-36024100000	1482850000000	375933000000	5739400000000	787836000000	5389410000000	44168900000	56410900000	483872000000000
12.75	173963000000	315458000000	166733000000	1221600000000	336083000000	5426170000000	721013000000	6377770000000	106066000000	67750300000	486251000000000
13	493678000000	329891000000	60526900000	1579600000000	344053000000	4482280000000	568275000000	8146400000000	6358170000	90429000000	483645000000000
13.25	-205699000000	156698000000	215009000000	1115160000000	495484000000	3898960000000	787836000000	6533820000000	78648000000	11053500000	488872000000000
13.5	193945000000	503084000000	137768000000	1318360000000	511424000000	7420780000000	978758000000	6897950000000	-473419000	-285866000	483539000000000
13.75	253891000000	402055000000	243974000000	1269980000000	463604000000	8332500000000	701921000000	7886310000000	106173000000	11053500000	483630000000000
14	193945000000	113400000000	108802000000	1405440000000	487514000000	4879620000000	692375000000	6325750000000	102689000000	124447000000	482614000000000
14.25	233909000000	445353000000	243974000000	1598960000000	543305000000	4120300000000	721013000000	6117670000000	195657000000	45071600000	481448000000000
14.5	34087300000	344324000000	234319000000	1008730000000	344053000000	7099610000000	711467000000	8094390000000	88964200000	124447000000	483478000000000
14.75	293856000000	488651000000	176388000000	1076460000000	304202000000	5039250000000	911935000000	6481800000000	88933600000	56410900000	486796000000000
15	313838000000	907200000000	2596330000	1240950000000	519395000000	5510840000000	530091000000	6377770000000	61454400000	90429000000	482569000000000
15.25	94033900000	488651000000	263284000000	1260300000000	383903000000	6154020000000	864205000000	7886310000000	106173000000	56410900000	485554000000000
15.5	34087300000	546382000000	128113000000	1579600000000	415784000000	3903000000000	625552000000	5649500000000	120005000000	11053500000	482524000000000
15.75	293856000000	445353000000	79837100000	1144190000000	288262000000	4111870000000	854659000000	7158050000000	223136000000	-285866000	485145000000000
16	513660000000	762873000000	215009000000	1531230000000	367963000000	6676630000000	1016940000000	7054010000000	51046400000	-285866000	483130000000000
16.25	54069500000	661844000000	60526900000	1424790000000	312173000000	5370620000000	826020000000	8926690000000	150877000000	45071600000	486523000000000
16.5	673518000000	546382000000	31561600000	1415110000000	367963000000	5040100000000	892843000000	8042370000000	113127000000	33732200000	486190000000000
16.75	433731000000	272160000000	89492200000	1037760000000	415784000000	3085020000000	797382000000	7314100000000	71785800000	56410900000	485008000000000
17	593589000000	777306000000	272939000000	979701000000	264352000000	4476970000000	806928000000	6013630000000	64862500000	124447000000	487432000000000
17.25	293856000000	589680000000	99147300000	1047430000000	527365000000	4909160000000	978758000000	7262080000000	164662000000	124447000000	489311000000000
17.5	333820000000	734008000000	195698000000	1260300000000	328113000000	980161000000	969212000000	7106030000000	75132800000	11053500000	487660000000000
17.75	293856000000	546382000000	89492200000	1057110000000	479544000000	8557310000000	940574000000	9706970000000	175085000000	45071600000	481827000000000
18	613571000000	719575000000	176388000000	1250630000000	383903000000	6472640000000	740105000000	8094390000000	137229000000	11053500000	487432000000000
18.25	313838000000	690709000000	41216700000	1337710000000	375933000000	3111230000000	950120000000	7886310000000	130535000000	-11625200000	488296000000000
18.5	114016000000	228862000000	89492200000	1415110000000	391873000000	5278580000000	854659000000	8354480000000	54653300000	67750300000	482736000000000
18.75	133998000000	820604000000	253629000000	1386090000000	455634000000	4818550000000	969212000000	7782270000000	151014000000	-22964600000	483357000000000
19	293856000000	791739000000	157078000000	1279650000000	567215000000	4040950000000	959666000000	8302460000000	130168000000	67750300000	484811000000000
19.25	333820000000	546382000000	128113000000	1192570000000	487514000000	4775680000000	797382000000	7626220000000	109673000000	79089700000	483842000000000
19.5	353802000000	705142000000	215009000000	1444140000000	415784000000	8195190000000	940574000000	8406500000000	102673000000	11053500000	480887000000000
19.75	333820000000	474218000000	108802000000	1086140000000	336083000000	7491130000000	1131500000000	7886310000000	116551000000	79089700000	485432000000000
20	293856000000	907200000000	99147300000	1163540000000	479544000000	5457700000000	902389000000	7834290000000	133637000000	22392900000	485751000000000
20.25	333820000000	272160000000	70182000000	1057110000000	296232000000	5336750000000	902389000000	7990350000000	68362400000	33732200000	481751000000000
20.5	613571000000	936066000000	215009000000	1202250000000	296232000000	6182090000000	1236500000000	8146400000000	133836000000	79089700000	479433000000000
20.75	-265646000000	1065960000000	215009000000	1337710000000	479544000000	2244010000000	969212000000	8198420000000	68362400000	79089700000	485402000000000
21	413749000000	358757000000	186043000000	1182890000000	367963000000	3568650000000	940574000000	8146400000000	78846800000	22392900000	484917000000000
21.25	1053180000000	849469000000	157078000000	1173220000000	415784000000	1670250000000	931028000000	8874670000000	212927000000	-285866000	487281000000000
21.5	153980000000	228862000000	186043000000	1318360000000	399843000000	3905690000000	950120000000	8094390000000	164693000000	22392900000	482917000000000
21.75	-5877120000	690709000000	272939000000	1182890000000	567215000000	4025500000000	1141040000000	10071100000000	92555900000	-45643300000	483099000000000
22	453713000000	806171000000	166733000000	1047430000000	423754000000	5283900000000	1198320000000	7470160000000	240498000000	33732200000	482418000000000
22.25	353802000000	589680000000	224664000000	1405440000000	527365000000	2147870000000	988304000000	8198420000000	195779000000	56410900000	483387000000000
22.5	313838000000	690709000000	292249000000	1115160000000	487514000000	2649140000000	854659000000	8302460000000	130351000000	79089700000	484599000000000
22.75	173963000000	690709000000	60526900000	1134510000000	439694000000	5396770000000	997850000000	7314100000000	133729000000	45071600000	481766000000000
23	373785000000	459786000000	205353000000	1134510000000	511424000000	3133760000000	1045580000000	7418140000000	126943000000	22392900000	486114000000000
23.25	373785000000	993797000000	205353000000	1134510000000	336083000000	6692290000000	978758000000	7001990000000	164662000000	22392900000	481221000000000
23.5	473696000000	835037000000	166733000000	1115160000000	399843000000	4174720000000	1188770000000	7938330000000	116566000000	56410900000	484296000000000
23.75	333820000000	1441210000000	157078000000	911970000000	439694000000	3053210000000	854659000000	8510540000000	71923500000	56410900000	484554000000000
24	693500000000	892768000000	330870000000	989377000000	407813000000	2474640000000	1179230000000	9446870000000	192386000000	79089700000	480615000000000
24.25	333820000000	647411000000	243974000000	1202250000000	495484000000	7969100000000	1131500000000	7106030000000	144259000000	45071600000	480130000000000
24.5	773429000000	1138120000000	79837100000	1231270000000	415784000000	2941410000000	1246050000000	8250440000000	137321000000	79089700000	480978000000000
24.75	533642000000	1022660000000	118458000000	1231270000000	439694000000	790139000000	959666000000	8718610000000	205988000000	45071600000	484326000000000
25	213927000000	719575000000	388800000000	1260300000000	447664000000	1278950000000	1265140000000	6585840000000	206279000000	101768000000	481705000000000
25.25	-5877120000	993797000000	466041000000	853915000000	336083000000	3277600000000	1093310000000	9342840000000	168376000000	45071600000	483054000000000
25.5	633553000000	1758730000000	41216700000	1066780000000	447664000000	5095080000000	1093310000000	7678230000000	102872000000	79089700000	484008000000000
25.75	14105100000	1080390000000	-7058770000	1037760000000	511424000000	2132920000000	1284230000000	9758990000000	178524000000	90429000000	485948000000000
26	74051700000	1123690000000	157078000000	1531230000000	439694000000	4459120000000	1370150000000	6741900000000	92586400000	101768000000	479342000000000
26.25	-5877120000	1080390000000	311560000000	960349000000	463604000000	7342200000000	1112400000000	8198420000000	150984000000	45071600000	485190000000000
26.5	513660000000	1166990000000	321215000000	1134510000000	407813000000	5117970000000	1312870000000	6637860000000	78831500000	226501000000	480418000000000
26.75	493678000000	1195860000000	176388000000	1289330000000	256382000000	5397400000000	1016940000000	9134760000000	171800000000	-285866000	481312000000000
27	513660000000	690709000000	108802000000	1037760000000	423754000000	5173370000000	1236500000000	8354480000000	147560000000	45071600000	484872000000000
27.25	433731000000	1268020000000	417766000000	940998000000	407813000000	3522670000000	1236500000000	9186780000000	188886000000	-11625200000	485311000000000
27.5	-165735000000	734008000000	195698000000	1424790000000	367963000000	1794320000000	1398790000000	7314100000000	209610000000	-11625200000	484432000000000
27.75	293856000000	1412350000000	311560000000	940998000000	511424000000	6106480000000	1064670000000	8302460000000	209641000000	45071600000	482433000000000
28	773429000000	1181420000000	137768000000	1424790000000	439694000000	4726860000000	1016940000000	9290820000000	185478000000	11053500000	481630000000000
28.25	173963000000	820604000000	330870000000	1115160000000	431724000000	4526290000000	1246050000000	7938330000000	202916000000	33732200000	480039000000000
28.5	453713000000	1224720000000	79837100000	1037760000000	423754000000	4355950000000	1236500000000	8042370000000	120020000000	90429000000	485796000000000
28.75	273874000000	546382000000	166733000000	1173220000000	383903000000	4087920000000	1379700000000	8978700000000	168361000000	45071600000	482554000000000
29	533642000000	907200000000	282594000000	1279650000000	575185000000	1241390000000	1331960000000	10331200000000	113295000000	79089700000	485342000000000
29.25	373785000000	1195860000000	137768000000	1173220000000	399843000000	2489870000000	1169680000000	7782270000000	116658000000	56410900000	482478000000000
29.5	373785000000	1369050000000	89492200000	708777000000	503454000000	5195120000000	1284230000000	7886310000000	144274000000	67750300000	480933000000000
29.75	593589000000	1340180000000	-36024100000	921646000000	415784000000	2857370000000	1064670000000	9394850000000	137428000000	79089700000	484205000000000
30	673518000000	1282450000000	205353000000	1163540000000	407813000000	4864950000000	1322420000000	9342840000000	175162000000	67750300000	482660000000000
30.25	114016000000	1037100000000	137768000000	989377000000	583155000000	1864890000000	1379700000000	7730250000000	133989000000	22392900000	482705000000000
30.5	633553000000	1426780000000	137768000000	1086140000000	511424000000	1424830000000	1370150000000	9915040000000	216518000000	-11625200000	486432000000000
30.75	-25859300000	806171000000	446731000000	1173220000000	607065000000	4710500000000	1207870000000	10019100000000	251059000000	56410900000	482887000000000
31	833375000000	892768000000	272939000000	1076460000000	583155000000	1987180000000	1112400000000	8926690000000	185463000000	45071600000	483433000000000
31.25	433731000000	820604000000	272939000000	1018400000000	415784000000	1840160000000	1570620000000	7522180000000	164739000000	90429000000	481827000000000
31.5	613571000000	1123690000000	398455000000	757156000000	487514000000	1161970000000	1188770000000	8770630000000	154637000000	11053500000	484129000000000
31.75	14105100000	1051530000000	205353000000	1202250000000	495484000000	2991850000000	1160130000000	7990350000000	182039000000	67750300000	487811000000000
32	14105100000	892768000000	292249000000	1192570000000	543305000000	6525430000000	1093310000000	7886310000000	123612000000	90429000000	482190000000000
32.25	353802000000	1037100000000	215009000000	1008730000000	415784000000	2259250000000	1341510000000	9186780000000	268130000000	56410900000	483796000000000
32.5	233909000000	1628840000000	437076000000	1144190000000	519395000000	4865020000000	1083770000000	8822650000000	47944100000	33732200000	483766000000000
32.75	373785000000	1138120000000	128113000000	1192570000000	527365000000	-195758000000	1055130000000	7782270000000	178647000000	56410900000	481599000000000
33	713482000000	1426780000000	437076000000	960349000000	471574000000	1274620000000	1456060000000	9342840000000	151152000000	33732200000	487099000000000
33.25	753446000000	1008230000000	60526900000	989377000000	519395000000	4176920000000	1446520000000	7834290000000	230273000000	67750300000	480418000000000
33.5	453713000000	1787600000000	263284000000	1066780000000	328113000000	3149140000000	1312870000000	8406500000000	168453000000	113108000000	483251000000000
33.75	173963000000	1672140000000	205353000000	960349000000	407813000000	3692360000000	1513340000000	7886310000000	251028000000	79089700000	483478000000000
34	293856000000	1455640000000	234319000000	1395760000000	495484000000	1298570000000	1303330000000	8978700000000	206294000000	56410900000	482751000000000
34.25	613571000000	892768000000	446731000000	1318360000000	750527000000	4664440000000	1284230000000	7834290000000	230503000000	101768000000	482175000000000
34.5	713482000000	1744300000000	427421000000	786184000000	479544000000	3218150000000	1541980000000	8510540000000	171815000000	33732200000	484948000000000
34.75	34087300000	1239150000000	340525000000	1037760000000	415784000000	3053990000000	1876090000000	10175100000000	195917000000	11053500000	482842000000000
35	193945000000	1758730000000	263284000000	1028080000000	415784000000	2703770000000	1551530000000	7158050000000	178723000000	90429000000	476888000000000
35.25	253891000000	1672140000000	263284000000	1173220000000	607065000000	4025010000000	1341510000000	8094390000000	226988000000	113108000000	482296000000000
35.5	473696000000	1253590000000	272939000000	1386090000000	503454000000	5225940000000	1417880000000	9238800000000	151137000000	45071600000	479781000000000
35.75	193945000000	1022660000000	195698000000	1318360000000	575185000000	3960680000000	1436970000000	9863020000000	202947000000	33732200000	480736000000000
36	513660000000	1571110000000	99147300000	1105490000000	503454000000	-1570850000000	1045580000000	8978700000000	240742000000	11053500000	485660000000000
36.25	453713000000	1758730000000	243974000000	931322000000	511424000000	1654740000000	1303330000000	7782270000000	199493000000	67750300000	480993000000000
36.5	193945000000	1845330000000	272939000000	1008730000000	495484000000	2505880000000	1513340000000	9602930000000	192554000000	33732200000	479160000000000
36.75	373785000000	1470080000000	243974000000	1182890000000	495484000000	4377570000000	1494250000000	9811010000000	226881000000	101768000000	483114000000000
37	193945000000	2047390000000	195698000000	1250630000000	591125000000	1959970000000	1379700000000	8614570000000	199340000000	45071600000	482008000000000
37.25	-65823700000	1325750000000	446731000000	999053000000	487514000000	3040030000000	1360600000000	9758990000000	230457000000	22392900000	480069000000000
37.5	14105100000	1599970000000	263284000000	786184000000	583155000000	4078430000000	1599260000000	8042370000000	195963000000	113108000000	480069000000000
37.75	593589000000	2018520000000	311560000000	1231270000000	447664000000	3373460000000	1169680000000	8770630000000	230396000000	90429000000	480645000000000
38	114016000000	1484510000000	475696000000	1124840000000	423754000000	3324150000000	1436970000000	8770630000000	316655000000	79089700000	481099000000000
38.25	293856000000	1542240000000	292249000000	1173220000000	575185000000	4081120000000	1503790000000	7938330000000	275023000000	67750300000	480463000000000
38.5	74051700000	1181420000000	359835000000	1550580000000	599095000000	2882880000000	1265140000000	8614570000000	130596000000	22392900000	479903000000000
38.75	673518000000	1729870000000	137768000000	979701000000	535335000000	4707950000000	1456060000000	9342840000000	271722000000	11053500000	481236000000000
39	553624000000	1484510000000	186043000000	1163540000000	535335000000	4602240000000	1360600000000	9550910000000	220095000000	101768000000	479100000000000
39.25	693500000000	1571110000000	157078000000	989377000000	535335000000	2897050000000	1522890000000	8198420000000	140866000000	22392900000	482524000000000
39.5	353802000000	1729870000000	272939000000	1144190000000	423754000000	3329460000000	1436970000000	8094390000000	233865000000	113108000000	480781000000000
39.75	313838000000	1614400000000	282594000000	1424790000000	630976000000	-2450890000000	1456060000000	8302460000000	178861000000	67750300000	483811000000000
40	213927000000	2061820000000	243974000000	931322000000	503454000000	2696400000000	1503790000000	8718610000000	264936000000	11053500000	483296000000000
40.25	333820000000	1470080000000	311560000000	979701000000	615036000000	4167710000000	1713810000000	8822650000000	233972000000	45071600000	478887000000000
40.5	713482000000	2639130000000	292249000000	1008730000000	559245000000	2634190000000	1742450000000	8562550000000	230579000000	90429000000	483690000000000
40.75	-5877120000	1571110000000	359835000000	1240950000000	495484000000	953595000000	1513340000000	9290820000000	223656000000	33732200000	482311000000000
41	413749000000	1599970000000	388800000000	1095810000000	519395000000	4582260000000	1389240000000	8458520000000	154789000000	101768000000	482933000000000
41.25	713482000000	1729870000000	137768000000	834563000000	559245000000	2926100000000	1446520000000	7938330000000	223549000000	45071600000	481478000000000
41.5	913304000000	2032950000000	224664000000	1018400000000	479544000000	2020480000000	1637440000000	7522180000000	196115000000	79089700000	482827000000000
41.75	633553000000	1542240000000	301904000000	911970000000	638946000000	577728000000	1656530000000	7782270000000	288854000000	67750300000	481918000000000
42	74051700000	2119550000000	147423000000	1202250000000	527365000000	4799490000000	1436970000000	8406500000000	196146000000	-11625200000	477282000000000
42.25	573607000000	1614400000000	108802000000	1289330000000	511424000000	1923550000000	1580160000000	8562550000000	292400000000	22392900000	479054000000000
42.5	513660000000	1888630000000	408111000000	1308680000000	630976000000	1052220000000	1494250000000	7574200000000	237319000000	147126000000	484872000000000
42.75	393767000000	1729870000000	456386000000	1192570000000	439694000000	1173380000000	1360600000000	8354480000000	230518000000	45071600000	481781000000000
43	553624000000	1874190000000	417766000000	1095810000000	694736000000	3644820000000	1456060000000	9863020000000	282344000000	113108000000	483826000000000
43.25	34087300000	1441210000000	253629000000	1318360000000	638946000000	4183650000	1570620000000	8302460000000	285431000000	45071600000	483645000000000
43.5	893322000000	1903060000000	562592000000	940998000000	623006000000	3731760000000	1503790000000	8302460000000	158243000000	22392900000	480842000000000
43.75	353802000000	1830900000000	263284000000	1415110000000	423754000000	1865170000000	1589710000000	7418140000000	196085000000	124447000000	483660000000000
44	653535000000	2004090000000	504662000000	1279650000000	575185000000	3435030000000	1522890000000	9550910000000	278676000000	181144000000	477236000000000
44.25	493678000000	1859760000000	311560000000	1202250000000	543305000000	-1009270000000	1551530000000	8666590000000	237457000000	56410900000	477433000000000
44.5	413749000000	1787600000000	533627000000	1202250000000	591125000000	4534640000000	1522890000000	8042370000000	172014000000	45071600000	482175000000000
44.75	713482000000	2047390000000	514317000000	1550580000000	423754000000	3817340000000	1284230000000	9186780000000	278614000000	169805000000	481130000000000
45	633553000000	2061820000000	166733000000	902294000000	543305000000	1688330000000	1627890000000	9134760000000	182422000000	101768000000	481342000000000
45.25	133998000000	2148420000000	186043000000	1269980000000	455634000000	2365460000000	1494250000000	9498890000000	275267000000	56410900000	479796000000000
45.5	433731000000	2061820000000	253629000000	1240950000000	455634000000	4110320000000	1713810000000	8926690000000	172075000000	33732200000	478160000000000
45.75	253891000000	1787600000000	398455000000	1115160000000	702706000000	1410160000000	1379700000000	9498890000000	299369000000	124447000000	483008000000000
46	553624000000	1816460000000	408111000000	1250630000000	559245000000	432409000000	1494250000000	7366120000000	223748000000	22392900000	486038000000000
46.25	433731000000	1989660000000	330870000000	1153870000000	519395000000	2819760000000	1341510000000	9030720000000	264875000000	33732200000	479796000000000
46.5	473696000000	1903060000000	272939000000	1473170000000	638946000000	2314720000000	1427430000000	8198420000000	271813000000	124447000000	482418000000000
46.75	813393000000	2105120000000	446731000000	1221600000000	702706000000	5098410000000	1713810000000	7886310000000	299461000000	11053500000	480478000000000
47	593589000000	1874190000000	359835000000	1357060000000	455634000000	601176000000	1589710000000	8146400000000	248018000000	90429000000	487175000000000
47.25	293856000000	2364910000000	456386000000	1482850000000	607065000000	280366000000	1608800000000	8042370000000	258028000000	79089700000	478766000000000
47.5	553624000000	2321610000000	359835000000	1415110000000	734587000000	-103935000000	1771090000000	7314100000000	344042000000	22392900000	482069000000000
47.75	473696000000	2249440000000	359835000000	1231270000000	686766000000	3556260000000	1561070000000	8718610000000	189284000000	11053500000	478721000000000
48	233909000000	2538100000000	446731000000	1299000000000	511424000000	139580000000	1675630000000	9238800000000	192692000000	45071600000	484281000000000
48.25	293856000000	2465940000000	446731000000	1260300000000	591125000000	3310050000000	1389240000000	8354480000000	320047000000	79089700000	479584000000000
48.5	273874000000	2249440000000	369490000000	1269980000000	694736000000	3444030000000	1446520000000	8094390000000	350981000000	135786000000	478918000000000
48.75	233909000000	1975220000000	321215000000	1124840000000	646916000000	1683080000000	1627890000000	8250440000000	306277000000	45071600000	479297000000000
49	253891000000	2321610000000	359835000000	1328030000000	615036000000	-240680000000	1494250000000	9706970000000	223717000000	181144000000	484705000000000
49.25	173963000000	1859760000000	369490000000	1289330000000	583155000000	1879560000000	1284230000000	9342840000000	223748000000	158465000000	479190000000000
49.5	273874000000	2437070000000	456386000000	1453820000000	941809000000	-1498430000000	1465610000000	9290820000000	209993000000	101768000000	481463000000000
49.75	453713000000	2465940000000	485351000000	1415110000000	607065000000	2918380000000	1857000000000	11007400000000	337241000000	90429000000	475418000000000
50	94033900000	2090680000000	359835000000	1337710000000	623006000000	3395000000000	1914280000000	10175100000000	216549000000	101768000000	480327000000000
50.25	193945000000	2278310000000	601213000000	1453820000000	551275000000	2433330000000	1818820000000	9915040000000	278874000000	56410900000	477675000000000
50.5	133998000000	1960790000000	157078000000	1047430000000	591125000000	2162540000000	1761540000000	9342840000000	282130000000	45071600000	479872000000000
50.75	233909000000	2451500000000	427421000000	1337710000000	694736000000	4028910000000	1646990000000	7054010000000	227309000000	101768000000	477206000000000
51	433731000000	2278310000000	446731000000	1308680000000	615036000000	2277740000000	2105200000000	8458520000000	327078000000	101768000000	477554000000000
51.25	513660000000	2263880000000	504662000000	950674000000	766467000000	2011690000000	1885640000000	9186780000000	271859000000	67750300000	480993000000000
51.5	633553000000	2177280000000	466041000000	1773120000000	567215000000	599340000000	2009740000000	8926690000000	364843000000	22392900000	479236000000000
51.75	853357000000	1744300000000	369490000000	1299000000000	623006000000	1526710000000	1723360000000	8198420000000	289114000000	101768000000	484357000000000
52	453713000000	2364910000000	311560000000	1405440000000	623006000000	2586510000000	1513340000000	9030720000000	216840000000	45071600000	481827000000000
52.25	213927000000	2523670000000	321215000000	1898910000000	638946000000	1777810000000	1790180000000	8562550000000	251212000000	147126000000	480009000000000
52.5	593589000000	2999950000000	359835000000	1221600000000	766467000000	2523950000000	1685170000000	7990350000000	220370000000	56410900000	480160000000000
52.75	733464000000	2927780000000	321215000000	1366740000000	591125000000	-894849000000	1570620000000	9290820000000	351180000000	124447000000	480296000000000
53	753446000000	2235010000000	301904000000	1618310000000	638946000000	2556540000000	1656530000000	10071100000000	282359000000	124447000000	482372000000000
53.25	213927000000	2451500000000	514317000000	1386090000000	822258000000	2187620000000	1656530000000	7730250000000	199585000000	45071600000	479342000000000
53.5	313838000000	2480370000000	379145000000	1357060000000	798347000000	2508220000000	1876090000000	9706970000000	272073000000	45071600000	477494000000000
53.75	573607000000	2061820000000	215009000000	1502200000000	742557000000	4453240000000	1713810000000	9082740000000	261604000000	22392900000	477751000000000
54	633553000000	2292740000000	398455000000	1589280000000	750527000000	225667000000	1685170000000	8406500000000	319986000000	181144000000	481902000000000
54.25	-165735000000	2379340000000	350180000000	1357060000000	710676000000	-494043000000	2076560000000	8250440000000	299537000000	67750300000	481418000000000
54.5	493678000000	2047390000000	369490000000	1473170000000	766467000000	4009070000000	1646990000000	8666590000000	216824000000	45071600000	479781000000000
54.75	593589000000	2364910000000	417766000000	1376410000000	742557000000	476202000000	1818820000000	7574200000000	316823000000	22392900000	475645000000000
55	653535000000	2552530000000	243974000000	1521550000000	726617000000	1521830000000	1809270000000	7938330000000	299446000000	56410900000	480902000000000
55.25	633553000000	2552530000000	514317000000	1569930000000	806317000000	2597000000000	1494250000000	9394850000000	271890000000	124447000000	478978000000000
55.5	293856000000	2451500000000	456386000000	1657010000000	630976000000	-2710000000000	1704260000000	10123100000000	323578000000	67750300000	484614000000000
55.75	213927000000	2783460000000	533627000000	1260300000000	846168000000	484841000000	2067020000000	7522180000000	309930000000	113108000000	482205000000000
56	653535000000	2841190000000	601213000000	1405440000000	567215000000	3761230000000	1780630000000	8510540000000	309930000000	-22964600000	476024000000000
56.25	193945000000	2595830000000	485351000000	1589280000000	567215000000	2089920000000	1761540000000	8978700000000	354481000000	101768000000	477282000000000
56.5	433731000000	2552530000000	504662000000	1792470000000	822258000000	-1952450000000	1694720000000	8926690000000	285798000000	45071600000	482418000000000
56.75	373785000000	2711290000000	398455000000	1860200000000	583155000000	2294600000000	1780630000000	9394850000000	258013000000	11053500000	480569000000000
57	693500000000	2797890000000	466041000000	1511870000000	822258000000	2468190000000	1570620000000	7834290000000	316762000000	101768000000	477115000000000
57.25	293856000000	2999950000000	427421000000	1444140000000	838198000000	1965070000000	2076560000000	8926690000000	292431000000	101768000000	478372000000000
57.5	873340000000	2898920000000	437076000000	1192570000000	599095000000	-1046760000000	1818820000000	8978700000000	320139000000	56410900000	485645000000000
57.75	893322000000	2826750000000	321215000000	1666690000000	782407000000	448636000000	1847460000000	8302460000000	323547000000	124447000000	482569000000000
58	393767000000	2956650000000	263284000000	1569930000000	838198000000	-1032660000000	1713810000000	7886310000000	406383000000	135786000000	480221000000000
58.25	193945000000	2249440000000	533627000000	1279650000000	559245000000	1692080000000	1580160000000	8354480000000	309747000000	56410900000	480978000000000
58.5	153980000000	2826750000000	495006000000	1492520000000	702706000000	-126960000000	1771090000000	9134760000000	299476000000	45071600000	479978000000000
58.75	213927000000	2379340000000	504662000000	1773120000000	670826000000	4543570000000	1799720000000	9498890000000	295961000000	56410900000	479281000000000
59	473696000000	2855620000000	514317000000	1647340000000	559245000000	1411300000000	2095650000000	7470160000000	333787000000	79089700000	479887000000000
59.25	433731000000	2711290000000	523972000000	1879560000000	758497000000	-385497000000	2000190000000	7834290000000	306262000000	101768000000	479221000000000
59.5	733464000000	3375200000000	475696000000	1502200000000	702706000000	3052570000000	1790180000000	10071100000000	216901000000	203823000000	478069000000000
59.75	1053180000000	2523670000000	388800000000	1850530000000	543305000000	516869000000	1818820000000	8042370000000	241048000000	45071600000	479039000000000
60	753446000000	2364910000000	340525000000	1773120000000	607065000000	457918000000	1732900000000	6845930000000	361465000000	113108000000	481736000000000

## Sheet: 500K
Time (ms)	m/z 28 Ethene	m/z 30 Formaldehyde	m/z 56 Acrolein	m/z 70 (2,3-DHF & 2,5-DHF)	m/z 86 THF-3-one	m/z 71 ROO	m/z 58 butanedial	m/z 103 OOQOOH	Sum UHP + KHP	m/z 84	m/z 72 THF
-30	-35557400000	200167000000	43905700000	4960270000	38012700000	948814000000	138379000000	-11047200000	-50752400000	24775100000	501456000000000
-29.75	-173535000000	-281882000000	99725900000	4960270000	-8145570000	-903937000000	100194000000	90077000000	4267360000	-20582400000	500722000000000
-29.5	263395000000	250034000000	-11914600000	105195000000	-26608900000	-1546020000000	-23905400000	-162733000000	-9502860000	24775100000	498522000000000
-29.25	263395000000	-398238000000	99725900000	-61863000000	47244300000	484297000000	-23905400000	494574000000	-43920800000	24775100000	498400000000000
-29	-311513000000	100433000000	110890000000	-61863000000	-35840500000	247912000000	4732950000	1000190000000	-26665900000	13435700000	502154000000000
-28.75	56428000000	33943100000	122054000000	-73000200000	-72767100000	2703450000000	186109000000	545136000000	-2594810000	-20582400000	497440000000000
-28.5	-541477000000	349768000000	-67734800000	4960270000	56476000000	-2238170000000	-42997700000	-213295000000	-61083900000	-43261100000	498732000000000
-28.25	-104546000000	83810200000	-23078600000	216567000000	56476000000	-3099260000000	186109000000	-718916000000	-9456990000	47453800000	500740000000000
-28	-173535000000	-49168700000	10413500000	-6176940000	-45072200000	2451320000000	-100274000000	-617792000000	-19834300000	36114400000	497929000000000
-27.75	-173535000000	-281882000000	-56570700000	-162098000000	-35840500000	481283000000	-109821000000	-112171000000	18022300000	-9243010000	501159000000000
-27.5	-58553700000	-148903000000	-45406700000	-73000200000	38012700000	1263670000000	-4813170000	-617792000000	18037600000	2096350000	498627000000000
-27.25	240399000000	166922000000	-45406700000	227704000000	-45072200000	3232650000000	167017000000	241763000000	-47313600000	47453800000	498435000000000
-27	194406000000	299901000000	-67734800000	283391000000	10317700000	730880000000	-4813170000	342887000000	4236780000	-9243010000	500164000000000
-26.75	-58553700000	-15923900000	32741600000	127470000000	65707600000	-3467510000000	-148005000000	646260000000	7721390000	2096350000	503184000000000
-26.5	-104546000000	-99035800000	133218000000	38371900000	1086080000	2283530000000	-42997700000	191201000000	-12804000000	104151000000	500181000000000
-26.25	263395000000	-414861000000	-112391000000	272253000000	10317700000	54631100000	90648000000	39514900000	107598000000	2096350000	497283000000000
-26	-472488000000	-82413400000	-11914600000	-117549000000	10317700000	-292442000000	-71636000000	241763000000	-9487570000	-77279200000	499710000000000
-25.75	56428000000	100433000000	110890000000	-184372000000	-54303800000	302342000000	90648000000	393449000000	-36905700000	58793200000	501962000000000
-25.5	-426495000000	-265259000000	21577600000	-228921000000	38012700000	1819570000000	-42997700000	-162733000000	-74808200000	-43261100000	499814000000000
-25.25	56428000000	-298504000000	32741600000	194293000000	38012700000	-1004170000000	4732950000	292325000000	45562700000	58793200000	502049000000000
-25	-35557400000	-182148000000	155546000000	-17314100000	-17377200000	1273930000000	138379000000	-415544000000	-16349700000	13435700000	496759000000000
-24.75	-58553700000	299901000000	-750524000	-195510000000	84170900000	-453759000000	52463600000	-415544000000	35216000000	58793200000	498103000000000
-24.5	447366000000	-32546300000	-45406700000	-128686000000	28781000000	2239820000000	-14359300000	393449000000	35277100000	36114400000	497702000000000
-24.25	-127543000000	-15923900000	88561800000	294528000000	1086080000	-1723130000000	-176643000000	-466106000000	31807800000	-9243010000	501037000000000
-24	217402000000	83810200000	-56570700000	-50725800000	-8145570000	1619940000000	-62089900000	241763000000	-16334500000	-31921700000	497370000000000
-23.75	56428000000	-99035800000	110890000000	4960270000	1086080000	-2165600000000	-42997700000	-466106000000	-19788500000	58793200000	503743000000000
-23.5	-81550100000	17320800000	-11914600000	94057900000	-8145570000	-224528000000	-100274000000	848508000000	28445500000	2096350000	496951000000000
-23.25	217402000000	133677000000	21577600000	82920700000	-91230400000	-2649670000000	176563000000	-314420000000	62695200000	2096350000	500356000000000
-23	263395000000	50565500000	144382000000	138607000000	47244300000	-1249230000000	-23905400000	-112171000000	14522400000	-20582400000	496445000000000
-22.75	102421000000	-132280000000	43905700000	60646300000	19549400000	-782167000000	-23905400000	191201000000	35200700000	-31921700000	497545000000000
-22.5	56428000000	-215392000000	-78898800000	261116000000	-100462000000	-575830000000	100194000000	292325000000	-36982100000	13435700000	495729000000000
-22.25	10435300000	100433000000	-123555000000	-306882000000	-26608900000	-88205400000	-119367000000	292325000000	-67946000000	-20582400000	501508000000000
-22	-35557400000	-331749000000	10413500000	-318019000000	28781000000	-1087790000000	52463600000	39514900000	-47344200000	36114400000	496619000000000
-21.75	125417000000	83810200000	21577600000	105195000000	65707600000	1557330000000	138379000000	-61609300000	-16319200000	-54600400000	498278000000000
-21.5	125417000000	233412000000	122054000000	-217784000000	65707600000	513587000000	33371300000	-314420000000	-5941790000	24775100000	505053000000000
-21.25	102421000000	-82413400000	110890000000	60646300000	1086080000	-797118000000	-52543800000	-769478000000	18007000000	47453800000	496567000000000
-21	102421000000	266656000000	77397800000	71783500000	28781000000	-1249380000000	224294000000	-61609300000	-33558700000	-9243010000	500338000000000
-20.75	171410000000	-132280000000	55069700000	82920700000	-54303800000	36393600000	-71636000000	-516668000000	-16319200000	24775100000	504389000000000
-20.5	10435300000	-82413400000	-212867000000	27234700000	74939300000	614817000000	-186189000000	-617792000000	-16349700000	-65939800000	494733000000000
-20.25	10435300000	50565500000	43905700000	-28451400000	1086080000	-868979000000	23825200000	-162733000000	-26757700000	2096350000	503691000000000
-20	125417000000	-165525000000	-11914600000	-28451400000	-35840500000	-1163860000000	-33451500000	-112171000000	-9502860000	13435700000	497632000000000
-19.75	608340000000	-32546300000	-750524000	205430000000	65707600000	-3374680000000	147925000000	39514900000	-12926300000	-65939800000	507323000000000
-19.5	56428000000	250034000000	43905700000	160881000000	-8145570000	-182095000000	-23905400000	292325000000	35185400000	-43261100000	500408000000000
-19.25	171410000000	200167000000	-56570700000	71783500000	-26608900000	221022000000	-52543800000	241763000000	-12911000000	-31921700000	497440000000000
-19	79424300000	-265259000000	-45406700000	82920700000	10317700000	-618196000000	-33451500000	-466106000000	-2640690000	-77279200000	498226000000000
-18.75	10435300000	-99035800000	21577600000	-128686000000	93402600000	2263650000000	23825200000	444011000000	-30120000000	24775100000	496759000000000
-18.5	-541477000000	233412000000	21577600000	27234700000	-63535500000	640539000000	167017000000	444011000000	31716100000	-65939800000	501456000000000
-18.25	562348000000	-15923900000	21577600000	294528000000	-35840500000	-696813000000	176563000000	39514900000	45471000000	13435700000	501194000000000
-18	171410000000	-32546300000	110890000000	-95274600000	-8145570000	1106010000000	-52543800000	-213295000000	59317700000	-9243010000	500443000000000
-17.75	-403499000000	-165525000000	21577600000	-28451400000	111866000000	-958454000000	4732950000	-11047200000	-50798200000	36114400000	497422000000000
-17.5	194406000000	83810200000	177874000000	194293000000	56476000000	181971000000	62009700000	545136000000	-61038000000	-31921700000	502730000000000
-17.25	-127543000000	133677000000	122054000000	138607000000	10317700000	710193000000	90648000000	-263858000000	-54114600000	-9243010000	496916000000000
-17	-12561000000	117055000000	43905700000	-195510000000	47244300000	1826020000000	23825200000	545136000000	813338000	-9243010000	498418000000000
-16.75	-81550100000	-298504000000	-67734800000	-150961000000	19549400000	-628812000000	14279100000	-314420000000	66210400000	13435700000	501927000000000
-16.5	148413000000	-82413400000	-11914600000	160881000000	-63535500000	-512923000000	42917400000	-263858000000	-12880400000	2096350000	500373000000000
-16.25	194406000000	-148903000000	-90062900000	-228921000000	-45072200000	-261732000000	33371300000	-314420000000	-71415300000	-9243010000	501491000000000
-16	-357506000000	67187900000	-23078600000	-217784000000	-8145570000	-790061000000	81101900000	-11047200000	11144800000	-9243010000	506275000000000
-15.75	102421000000	-298504000000	-750524000	-39588600000	10317700000	490140000000	-90728300000	140639000000	11144800000	-43261100000	501700000000000
-15.5	79424300000	233412000000	122054000000	-95274600000	-26608900000	-1834750000000	186109000000	292325000000	4313240000	47453800000	501316000000000
-15.25	-35557400000	100433000000	-34242700000	-50725800000	-63535500000	-4032210000000	-71636000000	-364982000000	73149100000	13435700000	509872000000000
-15	102421000000	-464728000000	-101227000000	-128686000000	-26608900000	-776664000000	23825200000	-263858000000	35216000000	2096350000	500216000000000
-14.75	286391000000	200167000000	-56570700000	-139823000000	-54303800000	-2727360000000	23825200000	393449000000	-16395600000	2096350000	501718000000000
-14.5	-58553700000	-182148000000	-23078600000	38371900000	19549400000	-3430090000000	-176643000000	342887000000	35277100000	2096350000	500705000000000
-14.25	-12561000000	-232015000000	-750524000	94057900000	19549400000	2756050000000	23825200000	-112171000000	11083700000	13435700000	495537000000000
-14	10435300000	83810200000	43905700000	-139823000000	-63535500000	-2048310000000	-214828000000	-466106000000	-19849600000	-43261100000	499780000000000
-13.75	148413000000	67187900000	-34242700000	-73000200000	-8145570000	-2456730000000	4732950000	-11047200000	42124000000	2096350000	504599000000000
-13.5	125417000000	133677000000	144382000000	-195510000000	-26608900000	-2283590000000	281570000000	-263858000000	-23257800000	-43261100000	508912000000000
-13.25	79424300000	-248637000000	-56570700000	38371900000	19549400000	1037430000000	-90728300000	39514900000	4236780000	-31921700000	499483000000000
-13	-472488000000	-531217000000	-168211000000	-73000200000	-26608900000	-1522550000000	138379000000	-162733000000	35216000000	13435700000	499413000000000
-12.75	-12561000000	266656000000	-101227000000	-73000200000	10317700000	-1743960000000	-14359300000	241763000000	-19803800000	47453800000	501683000000000
-12.5	171410000000	117055000000	32741600000	27234700000	-45072200000	1154260000000	23825200000	-162733000000	-19788500000	-9243010000	496322000000000
-12.25	56428000000	-364994000000	-23078600000	-73000200000	56476000000	-2360550000000	-62089900000	90077000000	-40436200000	13435700000	506607000000000
-12	-265521000000	67187900000	-145883000000	-28451400000	38012700000	-514177000000	-176643000000	-971727000000	42062800000	-43261100000	498889000000000
-11.75	171410000000	466125000000	-34242700000	183156000000	111866000000	-3748510000000	-138459000000	-61609300000	38670000000	-54600400000	503603000000000
-11.5	-426495000000	-331749000000	88561800000	-240058000000	-72767100000	-2424160000000	62009700000	-364982000000	-23273100000	70132500000	503167000000000
-11.25	148413000000	83810200000	-34242700000	-28451400000	-17377200000	-1423710000000	-81182100000	-921165000000	14598900000	47453800000	500495000000000
-11	-81550100000	-82413400000	166710000000	27234700000	10317700000	-274350000000	100194000000	696822000000	18083500000	2096350000	496497000000000
-10.75	33431700000	117055000000	32741600000	94057900000	-54303800000	586916000000	14279100000	-314420000000	11206000000	47453800000	501473000000000
-10.5	-150539000000	-381616000000	133218000000	183156000000	1086080000	-406503000000	23825200000	39514900000	-16380300000	-9243010000	502975000000000
-10.25	102421000000	83810200000	-11914600000	-39588600000	-91230400000	-1047060000000	-90728300000	90077000000	52440200000	13435700000	496933000000000
-10	-12561000000	283279000000	-78898800000	4960270000	47244300000	1969290000000	33371300000	-112171000000	-9426400000	-31921700000	498313000000000
-9.75	10435300000	-331749000000	66233700000	-462803000000	-8145570000	-41212000000	-33451500000	342887000000	-19819100000	-54600400000	495903000000000
-9.5	79424300000	266656000000	-212867000000	-106412000000	74939300000	1599110000000	42917400000	90077000000	35261800000	2096350000	498016000000000
-9.25	125417000000	183544000000	-56570700000	-139823000000	-54303800000	378285000000	23825200000	-11047200000	-23166000000	13435700000	502381000000000
-9	-35557400000	100433000000	110890000000	-139823000000	-35840500000	2014950000000	62009700000	-263858000000	-16303900000	47453800000	501072000000000
-8.75	-58553700000	-514595000000	-112391000000	-28451400000	-63535500000	-1159040000000	-42997700000	-11047200000	-71445900000	-20582400000	499046000000000
-8.5	539351000000	-248637000000	21577600000	-150961000000	102634000000	1959140000000	42917400000	-11047200000	18007000000	47453800000	501211000000000
-8.25	-58553700000	266656000000	-23078600000	49509100000	38012700000	2692620000000	-23905400000	-213295000000	35246500000	-9243010000	499081000000000
-8	-104546000000	-15923900000	-90062900000	-61863000000	-17377200000	559667000000	-71636000000	-11047200000	17976400000	-31921700000	498592000000000
-7.75	217402000000	17320800000	-190539000000	-139823000000	-81998800000	-574596000000	-23905400000	191201000000	7721390000	-54600400000	499675000000000
-7.5	102421000000	166922000000	21577600000	-39588600000	-35840500000	2448920000000	71555800000	-668354000000	-30135300000	2096350000	495991000000000
-7.25	-150539000000	698419000	-45406700000	205430000000	-26608900000	-1796690000000	-205282000000	292325000000	28338500000	-43261100000	505018000000000
-7	171410000000	117055000000	-157047000000	127470000000	-72767100000	583582000000	176563000000	-11047200000	35200700000	58793200000	501141000000000
-6.75	-311513000000	183544000000	55069700000	249979000000	47244300000	-1007530000000	-176643000000	-314420000000	-23319000000	-9243010000	504180000000000
-6.5	-311513000000	316523000000	66233700000	-162098000000	19549400000	87567300000	-71636000000	-11047200000	-23273100000	36114400000	494017000000000
-6.25	-58553700000	-248637000000	-23078600000	4960270000	-81998800000	2871470000000	-233920000000	595698000000	55924800000	-31921700000	494786000000000
-6	-173535000000	-65791000000	-34242700000	-251196000000	28781000000	-920842000000	-14359300000	342887000000	62710500000	-77279200000	499465000000000
-5.75	-242524000000	-148903000000	-23078600000	49509100000	10317700000	236100000000	-4813170000	-61609300000	76541900000	58793200000	496986000000000
-5.5	-403499000000	-497973000000	-101227000000	-73000200000	-81998800000	1686760000000	233840000000	-112171000000	4267360000	36114400000	502573000000000
-5.25	217402000000	133677000000	-179375000000	-84137400000	1086080000	-991391000000	-128913000000	-112171000000	28292600000	47453800000	500687000000000
-5	-334510000000	266656000000	-90062900000	82920700000	19549400000	553212000000	195655000000	191201000000	-40375000000	-88618500000	499989000000000
-4.75	-81550100000	216789000000	-112391000000	127470000000	-63535500000	-987784000000	-62089900000	90077000000	59302400000	-31921700000	495694000000000
-4.5	-58553700000	-315127000000	-11914600000	-84137400000	-45072200000	677830000000	-90728300000	342887000000	7721390000	-20582400000	500408000000000
-4.25	-104546000000	-381616000000	-34242700000	60646300000	56476000000	126647000000	-52543800000	241763000000	859213000	13435700000	499605000000000
-4	33431700000	698419000	-112391000000	172018000000	10317700000	4105470000000	128833000000	241763000000	28384400000	-20582400000	498103000000000
-3.75	-357506000000	-182148000000	-23078600000	-117549000000	19549400000	761755000000	-71636000000	342887000000	-16349700000	92811200000	495589000000000
-3.5	-58553700000	17320800000	-34242700000	-273470000000	10317700000	-1003920000000	-148005000000	-314420000000	24884500000	13435700000	499186000000000
-3.25	-127543000000	83810200000	-45406700000	-295744000000	1086080000	1177940000000	-119367000000	-112171000000	-81792700000	2096350000	499273000000000
-3	-495484000000	-32546300000	155546000000	82920700000	-45072200000	-1023050000000	-4813170000	-112171000000	-2579520000	-54600400000	502975000000000
-2.75	171410000000	-215392000000	32741600000	38371900000	-8145570000	-1564680000000	-23905400000	-11047200000	813338000	115490000000	501508000000000
-2.5	-104546000000	-132280000000	-179375000000	-84137400000	28781000000	-459747000000	-214828000000	646260000000	-26650600000	-43261100000	498697000000000
-2.25	79424300000	150300000000	-34242700000	-306882000000	-8145570000	-1533720000000	-33451500000	-162733000000	45547400000	-43261100000	500426000000000
-2	33431700000	-331749000000	-168211000000	-295744000000	1086080000	-2562240000000	23825200000	292325000000	-33497500000	104151000000	502853000000000
-1.75	-81550100000	-115658000000	43905700000	216567000000	-100462000000	2556290000000	-186189000000	-213295000000	-26696500000	-88618500000	494524000000000
-1.5	-127543000000	-99035800000	-67734800000	-95274600000	47244300000	-266000000000	71555800000	494574000000	7690800000	-31921700000	502765000000000
-1.25	-58553700000	316523000000	-750524000	-50725800000	-26608900000	-3948370000000	-109821000000	-112171000000	-57645100000	-9243010000	501561000000000
-1	-81550100000	698419000	-190539000000	-17314100000	19549400000	-644463000000	-243466000000	-263858000000	-26681200000	-31921700000	502154000000000
-0.75	-219528000000	17320800000	21577600000	27234700000	-63535500000	-91734100000	-157551000000	-61609300000	-9487570000	-43261100000	496654000000000
-0.5	1091260000000	2826500000000	769568000000	1898290000000	268804000000	12419800000000	653869000000	494574000000	35307700000	81471900000	484624000000000
-0.25	355380000000	1380350000000	401155000000	1965110000000	361120000000	11986000000000	501131000000	595698000000	-2503060000	13435700000	483349000000000
0	217402000000	1496710000000	345335000000	2143300000000	481132000000	13421300000000	472493000000	2466490000000	52486100000	36114400000	483838000000000
0.25	562348000000	1679560000000	523960000000	1898290000000	379584000000	11431900000000	405670000000	1758630000000	-19712000000	115490000000	481411000000000
0.5	769315000000	1563200000000	412319000000	2265810000000	379584000000	7417100000000	319755000000	1303570000000	859213000	47453800000	482982000000000
0.75	79424300000	1679560000000	222530000000	2254680000000	518059000000	7797770000000	252932000000	2112560000000	93735600000	47453800000	481009000000000
1	884296000000	1446840000000	356499000000	1998520000000	471900000000	7590940000000	596592000000	2163120000000	905088000	47453800000	486090000000000
1.25	102421000000	1214130000000	334171000000	2399460000000	499595000000	10265100000000	663415000000	2466490000000	107567000000	13435700000	481463000000000
1.5	493358000000	1579820000000	77397800000	1786910000000	324194000000	7190860000000	692054000000	3528300000000	114444000000	13435700000	483838000000000
1.75	401373000000	1413600000000	389991000000	2254680000000	379584000000	8284690000000	768423000000	4185610000000	107521000000	104151000000	487994000000000
2	401373000000	1097770000000	311843000000	1920560000000	508827000000	8539620000000	844792000000	4033920000000	49062600000	24775100000	482685000000000
2.25	999278000000	865061000000	512795000000	2121030000000	241109000000	10173200000000	749330000000	5196850000000	128276000000	104151000000	483104000000000
2.5	700326000000	981418000000	55069700000	2210130000000	370352000000	9282290000000	701600000000	3679980000000	14660000000	47453800000	481725000000000
2.75	286391000000	515992000000	233694000000	1809190000000	656533000000	7204540000000	844792000000	4337290000000	76526600000	36114400000	485793000000000
3	424369000000	1047910000000	144382000000	2009660000000	462669000000	6971310000000	606139000000	5702470000000	38853500000	92811200000	482895000000000
3.25	309388000000	17320800000	367663000000	1731230000000	638070000000	8779210000000	692054000000	4944040000000	73210200000	70132500000	480695000000000
3.5	424369000000	981418000000	278351000000	2265810000000	536522000000	7649540000000	797061000000	5651910000000	83434700000	70132500000	483593000000000
3.75	-81550100000	765327000000	345335000000	1820330000000	536522000000	10336100000000	653869000000	4893470000000	45746200000	70132500000	481900000000000
4	470362000000	698838000000	334171000000	1898290000000	545753000000	4675290000000	968891000000	6005840000000	-9380530000	2096350000	485043000000000
4.25	125417000000	732082000000	389991000000	1775780000000	499595000000	9697370000000	930707000000	7724950000000	124914000000	-9243010000	480031000000000
4.5	-58553700000	848439000000	233694000000	1753500000000	674997000000	7085320000000	911614000000	5651910000000	114551000000	24775100000	487016000000000
4.75	539351000000	1313870000000	177874000000	2121030000000	462669000000	4851890000000	902068000000	6562020000000	145531000000	2096350000	488255000000000
5	424369000000	964796000000	267187000000	2210130000000	536522000000	4235830000000	854338000000	6258650000000	69955000000	-9243010000	484990000000000
5.25	493358000000	831817000000	367663000000	1508480000000	444205000000	7794860000000	863884000000	6713710000000	104205000000	47453800000	484798000000000
5.5	746318000000	599104000000	267187000000	1920560000000	647302000000	5506240000000	968891000000	6966520000000	94010800000	36114400000	481481000000000
5.75	424369000000	432880000000	267187000000	2410600000000	628838000000	4136990000000	777969000000	6814830000000	87102800000	70132500000	483908000000000
6	217402000000	865061000000	133218000000	1586440000000	416510000000	2778110000000	1121630000000	8028320000000	111204000000	47453800000	485497000000000
6.25	677329000000	250034000000	311843000000	1642130000000	545753000000	3620790000000	1045260000000	7826070000000	121291000000	24775100000	483611000000000
6.5	424369000000	582481000000	77397800000	1630990000000	610375000000	1986290000000	959345000000	6612580000000	121475000000	81471900000	487260000000000
6.75	-81550100000	715460000000	389991000000	1686680000000	527290000000	4906430000000	911614000000	7977760000000	214550000000	13435700000	489094000000000
7	447366000000	898306000000	256022000000	1274600000000	471900000000	4396570000000	978437000000	6915960000000	142168000000	47453800000	486370000000000
7.25	723322000000	815194000000	300679000000	1675540000000	508827000000	3364160000000	1198000000000	7573260000000	145469000000	70132500000	485776000000000
7.5	516355000000	848439000000	110890000000	1586440000000	462669000000	1985400000000	1322100000000	8887880000000	114536000000	58793200000	483943000000000
7.75	470362000000	515992000000	289515000000	1775780000000	628838000000	2935640000000	1255270000000	8685630000000	152378000000	206205000000	485112000000000
8	769315000000	216789000000	222530000000	1508480000000	481132000000	3383150000000	1026170000000	8736190000000	169678000000	104151000000	485881000000000
8.25	286391000000	665593000000	144382000000	1731230000000	453437000000	2847620000000	1054810000000	8281130000000	114567000000	2096350000	484851000000000
8.5	447366000000	665593000000	334171000000	1430520000000	471900000000	4009080000000	1255270000000	8331700000000	166255000000	70132500000	478233000000000
8.75	217402000000	565859000000	155546000000	1385970000000	527290000000	1653890000000	1255270000000	10000200000000	125036000000	-9243010000	482651000000000
9	447366000000	648971000000	378827000000	1586440000000	518059000000	4272550000000	1140720000000	9444060000000	138684000000	206205000000	483716000000000
9.25	470362000000	333146000000	233694000000	1319150000000	416510000000	1360900000000	1331640000000	7573260000000	138776000000	81471900000	484257000000000
9.5	654333000000	798572000000	144382000000	1953970000000	453437000000	4924520000000	1245730000000	9090130000000	52577800000	2096350000	485881000000000
9.75	723322000000	682215000000	177874000000	1263460000000	545753000000	5608410000000	1703940000000	10455300000000	173132000000	70132500000	482895000000000
10	608340000000	333146000000	267187000000	1152090000000	490364000000	3688590000000	1560750000000	9494620000000	125189000000	24775100000	479822000000000
10.25	654333000000	582481000000	345335000000	1553030000000	453437000000	-445398000000	1121630000000	8635070000000	221519000000	92811200000	488570000000000
10.5	861300000000	599104000000	445811000000	1397110000000	490364000000	2655440000000	1503470000000	10202500000000	152485000000	70132500000	485357000000000
10.75	562348000000	515992000000	155546000000	1541900000000	582680000000	3000560000000	1226640000000	8584510000000	152607000000	126829000000	482651000000000
11	309388000000	366390000000	289515000000	1296880000000	573448000000	801225000000	1226640000000	8989000000000	217897000000	126829000000	481079000000000
11.25	930289000000	914928000000	323007000000	1497350000000	305731000000	2898260000000	1417560000000	10455300000000	118113000000	47453800000	482668000000000
11.5	539351000000	432880000000	244858000000	1664400000000	434974000000	2544080000000	1112080000000	10202500000000	262677000000	126829000000	482773000000000
11.75	470362000000	233412000000	401155000000	1720090000000	508827000000	1655390000000	1283910000000	9949680000000	173209000000	47453800000	481271000000000
12	746318000000	582481000000	345335000000	1430520000000	416510000000	2316120000000	1436650000000	8989000000000	245713000000	92811200000	482947000000000
12.25	263395000000	1131020000000	311843000000	1352560000000	721155000000	4240210000000	1388920000000	10556400000000	173224000000	24775100000	484746000000000
12.5	332384000000	748705000000	334171000000	1252330000000	444205000000	1900380000000	1408010000000	8584510000000	173255000000	24775100000	480922000000000
12.75	700326000000	748705000000	233694000000	1630990000000	554985000000	2926230000000	1618030000000	10101400000000	118296000000	126829000000	481882000000000
13	447366000000	998040000000	200202000000	1252330000000	619607000000	4855310000000	1455740000000	11769900000000	204203000000	81471900000	478739000000000
13.25	792311000000	1014660000000	189038000000	1742370000000	619607000000	828940000000	1866230000000	9545180000000	128597000000	138169000000	483157000000000
13.5	10435300000	166922000000	378827000000	1586440000000	582680000000	3837000000000	1388920000000	9646310000000	128689000000	81471900000	484222000000000
13.75	792311000000	931551000000	110890000000	1430520000000	527290000000	2643510000000	1360280000000	10101400000000	204264000000	47453800000	481620000000000
14	217402000000	831817000000	345335000000	1308010000000	610375000000	2456870000000	1589390000000	9798000000000	207825000000	104151000000	479874000000000
14.25	516355000000	1081150000000	110890000000	1051860000000	721155000000	1041800000000	1379370000000	10202500000000	149520000000	-9243010000	485898000000000
14.5	631337000000	632348000000	155546000000	1308010000000	721155000000	2665930000000	1408010000000	10607000000000	221611000000	24775100000	483087000000000
14.75	286391000000	565859000000	434647000000	1497350000000	554985000000	2604580000000	1904410000000	11871000000000	293977000000	81471900000	485479000000000
15	332384000000	599104000000	479303000000	1697820000000	545753000000	2891260000000	1522570000000	10708100000000	248891000000	-9243010000	481376000000000
15.25	723322000000	914928000000	-750524000	1330290000000	554985000000	121563000000	1465290000000	10050800000000	149321000000	126829000000	487714000000000
15.5	171410000000	549236000000	233694000000	1475070000000	554985000000	449057000000	1637120000000	10303600000000	262738000000	81471900000	487417000000000
15.75	332384000000	1081150000000	99725900000	1274600000000	536522000000	-165791000000	1856680000000	10354200000000	293824000000	172187000000	490560000000000
16	608340000000	1047910000000	389991000000	1653270000000	610375000000	4804440000000	1980780000000	9899120000000	262845000000	92811200000	478862000000000
16.25	677329000000	914928000000	133218000000	1352560000000	591912000000	3819970000000	1598940000000	8837320000000	232095000000	81471900000	484397000000000
16.5	194406000000	948173000000	434647000000	1341430000000	601143000000	4968950000000	1789860000000	10708100000000	225004000000	70132500000	484693000000000
16.75	1229240000000	815194000000	122054000000	1642130000000	527290000000	346545000000	1350740000000	11163200000000	238713000000	70132500000	485374000000000
17	194406000000	1197510000000	311843000000	1230050000000	462669000000	617442000000	1656210000000	10758700000000	318201000000	160847000000	482930000000000
17.25	677329000000	549236000000	222530000000	1341430000000	785776000000	770583000000	1675300000000	9393500000000	218203000000	92811200000	485252000000000
17.5	723322000000	1214130000000	256022000000	1475070000000	536522000000	4956550000000	1732580000000	10657600000000	325018000000	58793200000	481760000000000
17.75	378377000000	532614000000	177874000000	1196640000000	647302000000	476579000000	1436650000000	12376700000000	297385000000	115490000000	484973000000000
18	861300000000	798572000000	311843000000	1063000000000	684228000000	1344570000000	1646670000000	11972200000000	283478000000	104151000000	483227000000000
18.25	378377000000	881684000000	334171000000	1686680000000	591912000000	903649000000	1360280000000	11264300000000	300794000000	92811200000	479630000000000
18.5	378377000000	565859000000	334171000000	929349000000	554985000000	2675920000000	1780310000000	11011500000000	249335000000	104151000000	486544000000000
18.75	286391000000	698838000000	378827000000	1352560000000	601143000000	1427080000000	1856680000000	10000200000000	307962000000	36114400000	483279000000000
19	953285000000	831817000000	345335000000	1341430000000	702692000000	308681000000	1703940000000	12022700000000	352573000000	104151000000	486195000000000
19.25	585344000000	648971000000	323007000000	1274600000000	638070000000	2132270000000	1789860000000	12174400000000	232095000000	183526000000	478844000000000
19.5	677329000000	1197510000000	468139000000	1809190000000	601143000000	-524977000000	1913960000000	11466500000000	345742000000	126829000000	482266000000000
19.75	562348000000	1147640000000	244858000000	996172000000	610375000000	4476140000000	1980780000000	12477800000000	407639000000	160847000000	479333000000000
20	447366000000	615726000000	267187000000	1152090000000	518059000000	2269080000000	1713490000000	11416000000000	242427000000	92811200000	480136000000000
20.25	516355000000	1081150000000	244858000000	996172000000	665765000000	4082030000000	1828040000000	10657600000000	317957000000	36114400000	478949000000000
20.5	493358000000	549236000000	479303000000	1196640000000	527290000000	789588000000	1923500000000	11517100000000	266483000000	70132500000	482895000000000
20.75	700326000000	865061000000	122054000000	1430520000000	536522000000	1540890000000	1608480000000	10910400000000	221871000000	70132500000	482877000000000
21	608340000000	665593000000	300679000000	929349000000	591912000000	650358000000	2095330000000	12629500000000	301191000000	2096350000	482127000000000
21.25	1413210000000	1197510000000	222530000000	1374840000000	471900000000	-1502760000000	2057150000000	11668800000000	352742000000	330938000000	486003000000000
21.5	976282000000	1131020000000	456975000000	1341430000000	693460000000	2288080000000	2209890000000	10354200000000	335380000000	92811200000	477779000000000
21.75	792311000000	665593000000	389991000000	1063000000000	785776000000	2871230000000	1933050000000	10708100000000	338803000000	24775100000	481847000000000
22	953285000000	532614000000	244858000000	1530760000000	573448000000	3022730000000	2018960000000	10303600000000	486822000000	92811200000	473641000000000
22.25	746318000000	1230750000000	680256000000	1330290000000	758081000000	372132000000	1904410000000	12275500000000	393930000000	126829000000	480189000000000
22.5	470362000000	1180890000000	456975000000	1385970000000	490364000000	-330365000000	1942600000000	12578900000000	318140000000	160847000000	478774000000000
22.75	447366000000	1230750000000	166710000000	773428000000	638070000000	1686340000000	1952140000000	10101400000000	314747000000	172187000000	482651000000000
23	700326000000	1097770000000	557452000000	1452800000000	767313000000	698100000000	1923500000000	9090130000000	270120000000	194865000000	483733000000000
23.25	792311000000	914928000000	256022000000	1230050000000	795008000000	3873040000000	2085790000000	13185700000000	380374000000	160847000000	481690000000000
23.5	148413000000	1413600000000	512795000000	895937000000	674997000000	1997860000000	2276710000000	10050800000000	376476000000	172187000000	479490000000000
23.75	1022270000000	1097770000000	345335000000	1508480000000	693460000000	1776230000000	1923500000000	11921600000000	393960000000	160847000000	479700000000000
24	355380000000	1363730000000	300679000000	1140960000000	564217000000	670832000000	1990330000000	11011500000000	445572000000	138169000000	483314000000000
24.25	700326000000	648971000000	244858000000	1296880000000	730387000000	3747760000000	1961690000000	10556400000000	318262000000	92811200000	477552000000000
24.5	654333000000	1579820000000	334171000000	1129820000000	702692000000	1931030000000	1971230000000	10960900000000	390659000000	138169000000	476749000000000
24.75	1252240000000	1297240000000	278351000000	1630990000000	684228000000	1654480000000	2085790000000	11567700000000	269998000000	81471900000	480416000000000
25	562348000000	1114400000000	267187000000	1653270000000	850398000000	3433370000000	1999870000000	11213700000000	300992000000	126829000000	479577000000000
25.25	1045270000000	1081150000000	110890000000	1007310000000	702692000000	22337200000	2238530000000	9595750000000	487005000000	172187000000	477587000000000
25.5	815307000000	1264000000000	423483000000	1352560000000	748850000000	-673889000000	2038060000000	10607000000000	493837000000	70132500000	483593000000000
25.75	700326000000	1047910000000	456975000000	1263460000000	499595000000	3108980000000	2076240000000	12629500000000	452511000000	81471900000	480608000000000
26	654333000000	1563200000000	88561800000	1330290000000	684228000000	-3725000000000	2276710000000	11769900000000	356287000000	36114400000	483768000000000
26.25	677329000000	582481000000	378827000000	1230050000000	711923000000	2841650000000	2181250000000	11567700000000	363180000000	206205000000	482982000000000
26.5	1091260000000	1180890000000	378827000000	1708950000000	573448000000	3415210000000	1971230000000	9696870000000	418169000000	138169000000	476836000000000
26.75	1091260000000	1313870000000	256022000000	1140960000000	481132000000	1270840000000	1952140000000	11213700000000	407761000000	126829000000	480223000000000
27	976282000000	815194000000	122054000000	1285740000000	795008000000	-2076720000000	2114430000000	11668800000000	366389000000	194865000000	483104000000000
27.25	654333000000	1214130000000	256022000000	1185500000000	739618000000	-292072000000	2238530000000	10607000000000	428440000000	70132500000	482074000000000
27.5	562348000000	1247380000000	535124000000	1218920000000	859630000000	1170720000000	2209890000000	9545180000000	342425000000	47453800000	480119000000000
27.75	539351000000	1197510000000	311843000000	1118680000000	573448000000	3329140000000	2114430000000	10101400000000	452816000000	138169000000	476854000000000
28	631337000000	1313870000000	166710000000	1630990000000	758081000000	-141546000000	2200340000000	11163200000000	401113000000	183526000000	480398000000000
28.25	976282000000	1297240000000	356499000000	1140960000000	721155000000	2521790000000	1942600000000	11769900000000	383751000000	172187000000	477412000000000
28.5	562348000000	1147640000000	356499000000	1252330000000	850398000000	681447000000	2343530000000	11820500000000	514760000000	138169000000	479612000000000
28.75	631337000000	1629690000000	602108000000	1664400000000	785776000000	-264804000000	2362620000000	13438500000000	456072000000	172187000000	482493000000000
29	1045270000000	1363730000000	334171000000	1408250000000	795008000000	1820870000000	2295800000000	10809200000000	473265000000	217544000000	480573000000000
29.25	378377000000	1097770000000	412319000000	1096410000000	601143000000	-2296370000000	2286260000000	12022700000000	642191000000	138169000000	481131000000000
29.5	654333000000	1430220000000	256022000000	1408250000000	767313000000	1702330000000	2314890000000	11112600000000	404399000000	183526000000	483052000000000
29.75	240399000000	1396980000000	267187000000	1374840000000	813471000000	4513350000000	2467630000000	12022700000000	521683000000	92811200000	474793000000000
30	815307000000	1679560000000	278351000000	1241190000000	647302000000	1910300000000	2219430000000	11871000000000	321671000000	160847000000	478425000000000
30.25	1137260000000	1164260000000	401155000000	1419390000000	656533000000	3458360000000	2257620000000	11264300000000	407868000000	104151000000	476627000000000
30.5	999278000000	1264000000000	278351000000	1430520000000	610375000000	-795601000000	2620370000000	10303600000000	476750000000	194865000000	479385000000000
30.75	930289000000	1513330000000	289515000000	1352560000000	868861000000	2811080000000	2754020000000	10253100000000	321609000000	81471900000	477308000000000
31	1022270000000	964796000000	356499000000	1252330000000	822703000000	1639060000000	2133520000000	11871000000000	466388000000	183526000000	480241000000000
31.25	700326000000	1480090000000	434647000000	1363700000000	776545000000	-625195000000	2372170000000	12528300000000	490688000000	115490000000	481131000000000
31.5	1206250000000	1845780000000	278351000000	1686680000000	822703000000	2741580000000	2410360000000	11820500000000	473327000000	81471900000	477954000000000
31.75	976282000000	1845780000000	334171000000	1497350000000	674997000000	3169860000000	2123970000000	12427200000000	459663000000	262902000000	479019000000000
32	516355000000	1446840000000	401155000000	1608720000000	739618000000	925163000000	2372170000000	10708100000000	545662000000	138169000000	480241000000000
32.25	999278000000	1014660000000	278351000000	1196640000000	702692000000	1768520000000	2391260000000	11668800000000	573279000000	160847000000	479612000000000
32.5	539351000000	1313870000000	144382000000	1363700000000	822703000000	1987430000000	2200340000000	12578900000000	525152000000	172187000000	474374000000000
32.75	677329000000	1596450000000	456975000000	1575310000000	739618000000	2392800000000	2286260000000	11365400000000	507760000000	183526000000	477238000000000
33	700326000000	1613070000000	311843000000	1965110000000	758081000000	1108160000000	2362620000000	12225000000000	438955000000	194865000000	476103000000000
33.25	470362000000	1097770000000	456975000000	1174370000000	730387000000	820551000000	2515360000000	11921600000000	387343000000	58793200000	481812000000000
33.5	631337000000	1829160000000	434647000000	1285740000000	859630000000	4472490000000	2477180000000	9949680000000	501142000000	160847000000	475911000000000
33.75	355380000000	1529960000000	211366000000	1452800000000	979641000000	3052060000000	2419900000000	11769900000000	521836000000	138169000000	475369000000000
34	240399000000	1596450000000	133218000000	1374840000000	730387000000	4072150000000	2629920000000	11416000000000	549055000000	104151000000	476522000000000
34.25	723322000000	1396980000000	468139000000	1296880000000	795008000000	1927540000000	2391260000000	11567700000000	418261000000	13435700000	480311000000000
34.5	1206250000000	1313870000000	345335000000	1519620000000	970409000000	-532433000000	2687190000000	12275500000000	514775000000	172187000000	479316000000000
34.75	930289000000	1446840000000	501631000000	1230050000000	804240000000	2725820000000	2591730000000	11719400000000	535468000000	70132500000	477150000000000
35	907293000000	2095120000000	256022000000	1363700000000	822703000000	614146000000	2649010000000	11416000000000	493990000000	70132500000	477674000000000
35.25	838304000000	2128360000000	635600000000	1430520000000	942714000000	571119000000	2553550000000	11213700000000	501096000000	92811200000	476452000000000
35.5	1137260000000	1829160000000	323007000000	1274600000000	887325000000	510108000000	2477180000000	12427200000000	559570000000	104151000000	479473000000000
35.75	677329000000	1729420000000	356499000000	1397110000000	730387000000	2373560000000	2534460000000	10505900000000	576886000000	217544000000	479996000000000
36	608340000000	865061000000	568616000000	1363700000000	896556000000	4255900000000	2582190000000	10455300000000	535514000000	240223000000	479595000000000
36.25	700326000000	1829160000000	468139000000	1475070000000	776545000000	4243830000000	3059490000000	11820500000000	507897000000	149508000000	477290000000000
36.5	654333000000	1912270000000	244858000000	1096410000000	795008000000	1697100000000	2792200000000	11163200000000	507928000000	126829000000	475055000000000
36.75	838304000000	2211470000000	334171000000	1040720000000	905788000000	383769000000	2687190000000	10455300000000	697425000000	126829000000	478373000000000
37	1114260000000	1928890000000	456975000000	1452800000000	859630000000	3085650000000	2801750000000	11517100000000	483857000000	206205000000	475823000000000
37.25	1091260000000	1197510000000	535124000000	1809190000000	628838000000	2536050000000	2687190000000	10505900000000	559631000000	172187000000	479595000000000
37.5	815307000000	1829160000000	300679000000	1374840000000	758081000000	-1343220000000	2228980000000	10000200000000	594233000000	58793200000	478512000000000
37.75	194406000000	1247380000000	311843000000	1374840000000	850398000000	2119930000000	2467630000000	12578900000000	473587000000	240223000000	481865000000000
38	884296000000	1762670000000	546288000000	1530760000000	924251000000	-193196000000	2696740000000	10101400000000	476857000000	206205000000	478233000000000
38.25	677329000000	1978760000000	367663000000	1920560000000	942714000000	502292000000	2696740000000	12932800000000	473541000000	115490000000	478355000000000
38.5	746318000000	1629690000000	512795000000	1564170000000	785776000000	3859970000000	2811290000000	9646310000000	514989000000	138169000000	475038000000000
38.75	769315000000	1629690000000	624436000000	1965110000000	850398000000	548760000000	2859020000000	10607000000000	563085000000	115490000000	480939000000000
39	516355000000	1912270000000	624436000000	1675540000000	850398000000	1532640000000	2601280000000	12477800000000	425245000000	183526000000	477639000000000
39.25	1091260000000	1912270000000	423483000000	1486210000000	896556000000	235663000000	2763560000000	11466500000000	528759000000	149508000000	479525000000000
39.5	792311000000	1712800000000	323007000000	1463930000000	887325000000	2500260000000	2438990000000	10303600000000	594049000000	126829000000	479263000000000
39.75	654333000000	2144980000000	535124000000	1731230000000	850398000000	-787552000000	2715830000000	11567700000000	731858000000	149508000000	480101000000000
40	539351000000	2294580000000	445811000000	1864870000000	905788000000	-992343000000	2553550000000	11062000000000	525259000000	70132500000	475614000000000
40.25	884296000000	1629690000000	412319000000	1252330000000	961178000000	4259270000000	2582190000000	12831700000000	614835000000	206205000000	475003000000000
40.5	631337000000	2327830000000	456975000000	1920560000000	979641000000	-387108000000	2591730000000	12326100000000	583840000000	194865000000	480520000000000
40.75	1413210000000	1596450000000	300679000000	1330290000000	758081000000	-848991000000	2715830000000	11466500000000	566646000000	183526000000	479001000000000
41	976282000000	2261340000000	389991000000	1408250000000	905788000000	-1860120000000	2849480000000	12629500000000	652905000000	217544000000	479420000000000
41.25	1206250000000	1879030000000	680256000000	1508480000000	795008000000	-1033880000000	2515360000000	10859800000000	704578000000	160847000000	475474000000000
41.5	608340000000	1696180000000	345335000000	1697820000000	951946000000	1297930000000	2696740000000	10758700000000	580294000000	194865000000	473658000000000
41.75	792311000000	1978760000000	535124000000	1798050000000	868861000000	-2581280000000	2839930000000	11314900000000	666507000000	228884000000	480992000000000
42	1321230000000	1895650000000	535124000000	1608720000000	905788000000	-1781040000000	3164500000000	9747430000000	628681000000	104151000000	475649000000000
42.25	631337000000	1795910000000	445811000000	1408250000000	1136580000000	776056000000	3011760000000	10000200000000	663298000000	104151000000	477046000000000
42.5	470362000000	1895650000000	445811000000	1441660000000	970409000000	621515000000	2295800000000	12225000000000	714879000000	92811200000	477133000000000
42.75	309388000000	2394320000000	501631000000	2020800000000	684228000000	-213455000000	2668100000000	11112600000000	724813000000	251562000000	479106000000000
43	539351000000	1762670000000	535124000000	2121030000000	979641000000	-577861000000	2715830000000	10354200000000	666691000000	251562000000	476155000000000
43.25	286391000000	2244720000000	568616000000	1798050000000	1035030000000	-1029990000000	2925850000000	11517100000000	656084000000	183526000000	478495000000000
43.5	631337000000	1895650000000	590944000000	1475070000000	841166000000	-1255190000000	3088130000000	10202500000000	669992000000	194865000000	478774000000000
43.75	654333000000	1879030000000	445811000000	1864870000000	1118120000000	-380060000000	2696740000000	11719400000000	656115000000	70132500000	476888000000000
44	1183250000000	2161610000000	568616000000	1330290000000	822703000000	1650700000000	2983120000000	11820500000000	594355000000	296920000000	478425000000000
44.25	976282000000	2244720000000	412319000000	1630990000000	1062730000000	1371770000000	2992670000000	12528300000000	632013000000	217544000000	477692000000000
44.5	815307000000	2627030000000	602108000000	1686680000000	942714000000	-2472050000000	2849480000000	10960900000000	642299000000	172187000000	476312000000000
44.75	1022270000000	1879030000000	523960000000	1586440000000	1062730000000	-1789020000000	2916300000000	10253100000000	683808000000	160847000000	480887000000000
45	769315000000	2078490000000	323007000000	1196640000000	1035030000000	1192640000000	3011760000000	11213700000000	663084000000	251562000000	473973000000000
45.25	930289000000	2078490000000	456975000000	1798050000000	998104000000	-2286790000000	2992670000000	12275500000000	583595000000	183526000000	478006000000000
45.5	585344000000	2144980000000	657928000000	1764640000000	1071960000000	-533775000000	3135860000000	12528300000000	700833000000	296920000000	474339000000000
45.75	56428000000	2211470000000	356499000000	1753500000000	1191970000000	2012380000000	2887660000000	12528300000000	649344000000	240223000000	476347000000000
46	1045270000000	2361070000000	713748000000	1697820000000	1007340000000	1242690000000	3040400000000	10253100000000	652997000000	262902000000	474025000000000
46.25	424369000000	2494050000000	401155000000	1708950000000	1090420000000	2665080000000	3097680000000	12477800000000	708154000000	172187000000	474846000000000
46.5	562348000000	2394320000000	512795000000	1842600000000	998104000000	2049910000000	2849480000000	11213700000000	635589000000	364956000000	474898000000000
46.75	654333000000	2593790000000	747240000000	1675540000000	979641000000	-1188570000000	2773110000000	10455300000000	652661000000	183526000000	479455000000000
47	516355000000	2045250000000	557452000000	1987380000000	1071960000000	1366250000000	2954480000000	11264300000000	632059000000	206205000000	477482000000000
47.25	1459200000000	1895650000000	256022000000	1664400000000	915020000000	-643228000000	2944940000000	10607000000000	700986000000	251562000000	476958000000000
47.5	677329000000	1895650000000	479303000000	1798050000000	979641000000	804112000000	2830380000000	11062000000000	711471000000	104151000000	479752000000000
47.75	792311000000	2311210000000	389991000000	2054210000000	850398000000	1262020000000	2878120000000	12528300000000	694231000000	251562000000	474758000000000
48	792311000000	2261340000000	389991000000	2132170000000	1053490000000	-2119110000000	2887660000000	10253100000000	694308000000	342277000000	474723000000000
48.25	1390220000000	2560540000000	535124000000	2132170000000	924251000000	716483000000	2629920000000	10607000000000	666614000000	104151000000	472733000000000
48.5	608340000000	1746050000000	490467000000	1720090000000	998104000000	-305264000000	2992670000000	10708100000000	566646000000	296920000000	476854000000000
48.75	1206250000000	2161610000000	602108000000	2176720000000	1210430000000	3139490000000	2878120000000	10859800000000	732256000000	172187000000	477866000000000
49	769315000000	2377700000000	546288000000	2009660000000	1016570000000	-12387500000	3088130000000	11365400000000	670175000000	251562000000	474217000000000
49.25	424369000000	2261340000000	479303000000	1876010000000	1182740000000	-875705000000	3279050000000	9747430000000	700895000000	296920000000	481271000000000
49.5	700326000000	1762670000000	736076000000	2154440000000	961178000000	-2216050000000	2906750000000	10758700000000	663007000000	183526000000	481306000000000
49.75	562348000000	2228100000000	568616000000	1898290000000	1164270000000	1371350000000	3183590000000	12477800000000	725195000000	104151000000	473571000000000
50	1160250000000	2494050000000	568616000000	1764640000000	905788000000	-598247000000	2734920000000	11618200000000	715001000000	330938000000	478460000000000
50.25	516355000000	2444190000000	568616000000	1864870000000	758081000000	651690000000	3164500000000	11921600000000	687293000000	194865000000	473763000000000
50.5	424369000000	1895650000000	680256000000	1909420000000	1182740000000	1182170000000	2973580000000	10101400000000	845474000000	319598000000	473780000000000
50.75	378377000000	2843120000000	523960000000	1909420000000	1007340000000	-2252050000000	3145410000000	11011500000000	659859000000	251562000000	478914000000000
51	953285000000	2361070000000	423483000000	2321500000000	1035030000000	-589945000000	3422240000000	10960900000000	680232000000	149508000000	476312000000000
51.25	746318000000	2228100000000	657928000000	1742370000000	942714000000	2145790000000	3193140000000	10708100000000	697456000000	285580000000	471353000000000
51.5	838304000000	1812540000000	456975000000	1909420000000	1025800000000	1890890000000	3126310000000	11011500000000	811270000000	217544000000	474199000000000
51.75	1321230000000	2527300000000	389991000000	1664400000000	1164270000000	-986267000000	2916300000000	13236200000000	763465000000	240223000000	478512000000000
52	332384000000	2394320000000	546288000000	2132170000000	924251000000	2331830000000	3174050000000	9696870000000	601049000000	160847000000	475334000000000
52.25	1482200000000	2843120000000	512795000000	1786910000000	1108880000000	1113490000000	3441340000000	12528300000000	773521000000	262902000000	471790000000000
52.5	769315000000	2161610000000	557452000000	1842600000000	1182740000000	2945870000000	2897210000000	12882300000000	697960000000	308259000000	472366000000000
52.75	861300000000	2543920000000	389991000000	1887150000000	1228900000000	-1953900000000	3374510000000	10000200000000	604457000000	217544000000	479350000000000
53	608340000000	3208810000000	602108000000	1920560000000	1007340000000	2491440000000	3021310000000	11871000000000	666737000000	262902000000	473798000000000
53.25	1321230000000	2643650000000	590944000000	2198990000000	1311980000000	1361110000000	3374510000000	11416000000000	797577000000	353617000000	472977000000000
53.5	861300000000	3092460000000	691420000000	2065340000000	970409000000	1904240000000	3030850000000	11820500000000	801444000000	319598000000	473065000000000
53.75	1206250000000	2743390000000	646764000000	1820330000000	1311980000000	3583230000000	3221780000000	10758700000000	687507000000	160847000000	474182000000000
54	1091260000000	2942860000000	535124000000	1920560000000	1173510000000	2281920000000	3202680000000	11871000000000	676930000000	126829000000	471388000000000
54.25	1022270000000	2543920000000	579780000000	1519620000000	979641000000	699131000000	3450880000000	11062000000000	552968000000	285580000000	469817000000000
54.5	585344000000	3208810000000	568616000000	2020800000000	1136580000000	-1450440000000	3498610000000	10708100000000	701017000000	183526000000	476085000000000
54.75	1022270000000	2876370000000	590944000000	2410600000000	961178000000	-908243000000	3460430000000	11213700000000	783852000000	330938000000	477779000000000
55	1275230000000	2627030000000	512795000000	1441660000000	1136580000000	-6165820000	3632260000000	10809200000000	766613000000	262902000000	473222000000000
55.25	1045270000000	2959480000000	791897000000	2276950000000	1265820000000	-746673000000	3021310000000	10708100000000	646089000000	194865000000	476522000000000
55.5	1275230000000	2527300000000	602108000000	2065340000000	1182740000000	-565058000000	2620370000000	10607000000000	759705000000	70132500000	472331000000000
55.75	401373000000	2793260000000	568616000000	1976250000000	998104000000	-1500730000000	3069040000000	11416000000000	822015000000	262902000000	476434000000000
56	424369000000	2494050000000	468139000000	2065340000000	1155040000000	545251000000	2992670000000	11719400000000	825010000000	274241000000	473623000000000
56.25	1298230000000	2494050000000	680256000000	2054210000000	1127350000000	-949403000000	3393610000000	10708100000000	811362000000	194865000000	473344000000000
56.5	792311000000	3009350000000	724912000000	1920560000000	1395070000000	-2373670000000	3403150000000	10556400000000	770235000000	240223000000	478198000000000
56.75	746318000000	2627030000000	546288000000	1987380000000	1155040000000	-1527110000000	3317240000000	11264300000000	766552000000	183526000000	479333000000000
57	631337000000	2610410000000	691420000000	1486210000000	1081190000000	340868000000	3259960000000	11062000000000	908136000000	251562000000	475719000000000
57.25	700326000000	2577160000000	523960000000	1987380000000	1071960000000	1536800000000	3412700000000	9494620000000	890973000000	285580000000	475334000000000
57.5	907293000000	2444190000000	434647000000	2043070000000	1081190000000	-1534710000000	3947280000000	9393500000000	770189000000	194865000000	480276000000000
57.75	815307000000	2976100000000	568616000000	1642130000000	1191970000000	2240380000000	3775450000000	12629500000000	711440000000	251562000000	471249000000000
58	286391000000	2128360000000	590944000000	2399460000000	1164270000000	-1343220000000	3403150000000	10960900000000	815061000000	206205000000	478512000000000
58.25	723322000000	2976100000000	780733000000	2154440000000	924251000000	-2791620000000	3460430000000	11011500000000	763266000000	296920000000	478757000000000
58.5	539351000000	3408280000000	925865000000	2009660000000	951946000000	1078360000000	3164500000000	11719400000000	735496000000	319598000000	475177000000000
58.75	907293000000	3109080000000	613272000000	1953970000000	1145810000000	846604000000	3479520000000	13084500000000	780398000000	285580000000	475823000000000
59	700326000000	2693520000000	512795000000	1753500000000	1431990000000	910483000000	3632260000000	10455300000000	928447000000	432992000000	473938000000000
59.25	723322000000	2942860000000	445811000000	2198990000000	1053490000000	1867780000000	3174050000000	9798000000000	722123000000	285580000000	471476000000000
59.5	1091260000000	3192190000000	702584000000	1686680000000	1265820000000	-309026000000	2887660000000	12427200000000	759995000000	228884000000	472401000000000
59.75	1275230000000	3192190000000	736076000000	2031930000000	1118120000000	1782150000000	3527250000000	11365400000000	728695000000	285580000000	473152000000000
60	470362000000	2743390000000	836553000000	2254680000000	1459690000000	2122640000000	3374510000000	10758700000000	859688000000	330938000000	473553000000000

## Sheet: 525K
Time (ms)	m/z 28 Ethene	m/z 30 Formaldehyde	m/z 56 Acrolein	m/z 70 (2,3-DHF & 2,5-DHF)	m/z 86 THF-3-one	m/z 71 ROO	m/z 58 butanedial	m/z 103 OOQOOH	Sum UHP + KHP	m/z 84	m/z 72 THF
-30	187426000000	-341472000000	-82587700000	87346200000	27024300000	452055000000	292962000000	-105798000000	-42291100000	38591900000	490967000000000
-29.75	-605897000000	-357824000000	-16702100000	-230620000000	45142000000	-1864010000000	130678000000	854881000000	-76709000000	-40783600000	504971000000000
-29.5	28761500000	214502000000	16240700000	65417500000	36083100000	98074200000	35216400000	-4673810000	-18174100000	-74801700000	497685000000000
-29.25	142093000000	-194302000000	-38664000000	175061000000	-18269900000	2027290000000	197500000000	753757000000	-980423000	-29444200000	498476000000000
-29	-220569000000	-14428400000	-38664000000	262776000000	-27328800000	339110000000	25670200000	-763105000000	-66392800000	38591900000	498871000000000
-28.75	368757000000	50980300000	71145400000	43488800000	8906600000	1552340000000	130678000000	551509000000	-38852400000	49931300000	500005000000000
-28.5	51427900000	100037000000	49183500000	-110012000000	-27328800000	2506660000000	102039000000	652633000000	-28520900000	-97480400000	494352000000000
-28.25	-61904000000	132741000000	60164400000	-88083300000	63259700000	-1270270000000	-22060400000	-308046000000	-28475000000	61270700000	501517000000000
-28	232759000000	-63484900000	104088000000	-11332900000	27024300000	-171648000000	-69791000000	147012000000	53978100000	-18104900000	503888000000000
-27.75	-243235000000	67332500000	-16702100000	-66154600000	36083100000	930579000000	44762500000	197574000000	9320480000	4573860000	501929000000000
-27.5	96760700000	-96189200000	-115530000000	65417500000	8906600000	1259430000000	-12514200000	248137000000	-38882900000	-29444200000	495074000000000
-27.25	119427000000	-161598000000	-16702100000	43488800000	-9211100000	1313420000000	-22060400000	-965353000000	-14765900000	-6765500000	500606000000000
-27	-16571200000	361671000000	-5721160000	21560100000	-45446500000	750780000000	350238000000	-611419000000	12667500000	95288700000	500813000000000
-26.75	255425000000	-96189200000	-115530000000	120239000000	-27328800000	-1904680000000	35216400000	551509000000	64401400000	117967000000	496981000000000
-26.5	368757000000	-128894000000	115069000000	-77119000000	17965400000	-1455260000000	-2968120000	-611419000000	-7888470000	-108820000000	503390000000000
-26.25	-175236000000	-128894000000	71145400000	262776000000	-9211100000	677481000000	6578000000	-257484000000	5881750000	117967000000	498991000000000
-26	-197902000000	-194302000000	235859000000	-11332900000	108554000000	499035000000	92493100000	298699000000	12682800000	-18104900000	501122000000000
-25.75	278092000000	312615000000	49183500000	32524500000	-36387600000	-2081000000000	187954000000	-510295000000	29876400000	61270700000	500898000000000
-25.5	96760700000	100037000000	-5721160000	-153869000000	27024300000	1887770000000	130678000000	147012000000	-52607300000	4573860000	495538000000000
-25.25	346091000000	410728000000	60164400000	-142905000000	81377400000	1637120000000	302508000000	96450300000	23044800000	15913200000	499936000000000
-25	-197902000000	132741000000	334688000000	109275000000	-54505300000	-2049580000000	130678000000	-257484000000	-76709000000	83949400000	502136000000000
-24.75	-152570000000	-30780600000	137031000000	-22297200000	8906600000	2465570000000	121131000000	-510295000000	57508600000	-18104900000	494438000000000
-24.5	-61904000000	263558000000	-137492000000	87346200000	54200800000	-800803000000	-12514200000	-55235900000	43707800000	38591900000	500624000000000
-24.25	-84570400000	-177950000000	82126300000	175061000000	-36387600000	-1593520000000	-41152600000	298699000000	-14781200000	-29444200000	497307000000000
-24	-311234000000	-79837100000	-5721160000	-318335000000	-72623000000	-1104920000000	-98429300000	-156360000000	23060100000	38591900000	498871000000000
-23.75	187426000000	-47132700000	-16702100000	21560100000	117613000000	2590970000000	-31606500000	-409170000000	2443020000	49931300000	498098000000000
-23.5	-243235000000	1923780000	-170435000000	142168000000	81377400000	1373050000000	102039000000	-257484000000	19544900000	83949400000	498270000000000
-23.25	663420000000	50980300000	-93568600000	-22297200000	81377400000	-3846150000000	-12514200000	-358608000000	57508600000	95288700000	499541000000000
-23	119427000000	459785000000	49183500000	-368549000	-152250000	1432510000000	63854700000	753757000000	54069900000	-6765500000	502101000000000
-22.75	323424000000	263558000000	27221600000	-110012000000	-152250000	-509490000000	-60244900000	-257484000000	33391600000	38591900000	504215000000000
-22.5	-39237600000	67332500000	-126511000000	54453200000	-152250000	-352871000000	-22060400000	652633000000	-69755100000	27252600000	494197000000000
-22.25	-333901000000	-14428400000	-27683000000	-197727000000	81377400000	-2151640000000	-98429300000	-4673810000	43769000000	-40783600000	502376000000000
-22	-61904000000	361671000000	-5721160000	-368549000	54200800000	-778297000000	82947000000	45888300000	-1026300000	27252600000	500658000000000
-21.75	-197902000000	345319000000	169974000000	-197727000000	8906600000	1267600000000	-184344000000	-358608000000	71278800000	-18104900000	498802000000000
-21.5	255425000000	-259711000000	180955000000	153132000000	-152250000	-888503000000	-98429300000	-257484000000	-21643400000	4573860000	498235000000000
-21.25	6095160000	132741000000	16240700000	65417500000	-27328800000	1335650000000	44762500000	-156360000000	-62969400000	-6765500000	499352000000000
-21	51427900000	-63484900000	82126300000	98310600000	-54505300000	-1374440000000	63854700000	-4673810000	-4419160000	4573860000	499971000000000
-20.75	-265901000000	361671000000	-115530000000	-263513000000	17965400000	1507590000000	207047000000	450385000000	40177300000	-29444200000	500160000000000
-20.5	278092000000	100037000000	38202600000	10595800000	81377400000	-812586000000	82947000000	-206922000000	9228730000	-108820000000	500160000000000
-20.25	232759000000	247206000000	71145400000	-219656000000	108554000000	-346032000000	-69791000000	96450300000	2412430000	4573860000	496809000000000
-20	-288568000000	-112541000000	-115530000000	32524500000	-36387600000	3511620000000	-31606500000	399823000000	53962800000	15913200000	498785000000000
-19.75	210093000000	34628100000	-27683000000	-142905000000	27024300000	-2677900000000	16124100000	-105798000000	40330200000	-6765500000	502737000000000
-19.5	-84570400000	230854000000	71145400000	54453200000	45142000000	1069530000000	-155706000000	-560857000000	-949840000	117967000000	501225000000000
-19.25	28761500000	410728000000	-82587700000	120239000000	45142000000	1056380000000	6578000000	-813667000000	19743700000	49931300000	496448000000000
-19	74094300000	-194302000000	-60625800000	-252549000000	-36387600000	2729390000000	-2968120000	-4673810000	2412430000	-97480400000	496947000000000
-18.75	-16571200000	-194302000000	-71606700000	-33261600000	27024300000	-877250000000	-117522000000	-156360000000	23075400000	38591900000	498252000000000
-18.5	-356567000000	-276063000000	202917000000	-153869000000	54200800000	-235826000000	-2968120000	298699000000	88365500000	-108820000000	499232000000000
-18.25	-265901000000	345319000000	-16702100000	-110012000000	-18269900000	-539615000000	63854700000	-308046000000	16152100000	-6765500000	501964000000000
-18	-16571200000	-390528000000	-236321000000	109275000000	27024300000	1519590000000	-12514200000	-4673810000	47131300000	106628000000	497651000000000
-17.75	663420000000	-79837100000	-93568600000	-22297200000	45142000000	-1027630000000	73400900000	-712543000000	-42321700000	-6765500000	505108000000000
-17.5	119427000000	-161598000000	93107200000	32524500000	99495100000	-643761000000	63854700000	197574000000	78034000000	15913200000	502548000000000
-17.25	822085000000	-276063000000	-203378000000	-22297200000	-45446500000	226652000000	92493100000	-156360000000	16182700000	-29444200000	504026000000000
-17	-197902000000	-276063000000	-159454000000	-219656000000	-9211100000	-2059820000000	35216400000	-206922000000	12759200000	-6765500000	499816000000000
-16.75	51427900000	50980300000	104088000000	54453200000	27024300000	-545925000000	-60244900000	-409170000000	-4572070000	-52122900000	499799000000000
-16.5	391424000000	-79837100000	-126511000000	109275000000	-9211100000	-1365560000000	-60244900000	96450300000	-52530800000	-52122900000	499043000000000
-16.25	-265901000000	132741000000	-16702100000	21560100000	-54505300000	-1689790000000	178408000000	-105798000000	9351070000	-29444200000	499266000000000
-16	-537898000000	214502000000	104088000000	-120976000000	-54505300000	46838600000	-174798000000	-55235900000	9274610000	4573860000	501843000000000
-15.75	74094300000	-292415000000	-115530000000	339526000000	-36387600000	532823000000	-165252000000	602071000000	-7888470000	106628000000	503304000000000
-15.5	-107237000000	34628100000	60164400000	218918000000	-152250000	-210966000000	25670200000	45888300000	23060100000	-18104900000	499146000000000
-15.25	-220569000000	1923780000	27221600000	-368549000	36083100000	415249000000	-79337100000	-560857000000	-62938800000	-52122900000	497823000000000
-15	323424000000	-161598000000	148012000000	76381900000	-72623000000	601328000000	-31606500000	753757000000	-35321900000	-63462300000	498974000000000
-14.75	-152570000000	-308767000000	-82587700000	-66154600000	54200800000	-1463930000000	35216400000	753757000000	-14750600000	-52122900000	501345000000000
-14.5	119427000000	1923780000	71145400000	-252549000000	-45446500000	1738340000000	-22060400000	-257484000000	12820400000	-18104900000	495830000000000
-14.25	-84570400000	132741000000	-60625800000	-110012000000	-27328800000	-174059000000	-60244900000	905444000000	67702500000	4573860000	499747000000000
-14	-129903000000	50980300000	-5721160000	-142905000000	36083100000	-2421420000000	-127068000000	-156360000000	-28490300000	-29444200000	504318000000000
-13.75	-129903000000	-63484900000	27221600000	-197727000000	17965400000	-1349560000000	-107975000000	-611419000000	47207700000	95288700000	502015000000000
-13.5	-447232000000	-112541000000	27221600000	131204000000	-152250000	959631000000	-41152600000	248137000000	-59469500000	72610000000	502221000000000
-13.25	-560564000000	1923780000	-38664000000	21560100000	72318500000	-2825220000000	-60244900000	399823000000	-31913700000	106628000000	503751000000000
-13	-628564000000	-112541000000	-16702100000	361455000000	-9211100000	-2879930000000	25670200000	96450300000	16182700000	-52122900000	502874000000000
-12.75	368757000000	18276000000	-27683000000	-197727000000	-152250000	-848140000000	-117522000000	45888300000	-7857890000	-52122900000	502806000000000
-12.5	210093000000	116389000000	-71606700000	-11332900000	-27328800000	-706587000000	-41152600000	248137000000	-69862100000	-63462300000	501139000000000
-12.25	-84570400000	198150000000	126050000000	54453200000	72318500000	-424259000000	-69791000000	854881000000	-18174100000	117967000000	498201000000000
-12	-175236000000	214502000000	-16702100000	383384000000	72318500000	-214364000000	92493100000	197574000000	74625800000	-29444200000	499438000000000
-11.75	51427900000	328967000000	16240700000	-88083300000	-9211100000	82393000000	-69791000000	96450300000	-35413600000	27252600000	499197000000000
-11.5	414090000000	67332500000	-49644900000	153132000000	-36387600000	1029440000000	-155706000000	602071000000	19560200000	15913200000	497943000000000
-11.25	346091000000	50980300000	-5721160000	-55190300000	-36387600000	1004130000000	197500000000	854881000000	-49168600000	-6765500000	502909000000000
-11	391424000000	-145246000000	93107200000	21560100000	-81681900000	231845000000	-193891000000	-257484000000	-45729800000	-97480400000	501036000000000
-10.75	346091000000	-145246000000	-82587700000	-153869000000	63259700000	151042000000	-2968120000	147012000000	19682600000	49931300000	505520000000000
-10.5	-243235000000	-96189200000	-82587700000	-11332900000	8906600000	-1685880000000	6578000000	-257484000000	-69755100000	-29444200000	498355000000000
-10.25	142093000000	-47132700000	137031000000	-230620000000	-63564200000	-907303000000	-117522000000	197574000000	5942920000	-18104900000	501328000000000
-10	96760700000	296263000000	-5721160000	-131941000000	-36387600000	414247000000	-12514200000	197574000000	23029500000	-86141000000	501191000000000
-9.75	-265901000000	-243359000000	16240700000	120239000000	-45446500000	-540939000000	44762500000	-459732000000	67809500000	-154177000000	500847000000000
-9.5	346091000000	-112541000000	-82587700000	-11332900000	-90740700000	1950930000000	-31606500000	96450300000	9366360000	-86141000000	502496000000000
-9.25	210093000000	1923780000	191936000000	54453200000	-18269900000	258779000000	149770000000	-257484000000	-83586500000	-120159000000	499541000000000
-9	-220569000000	-406880000000	16240700000	-99047700000	-9211100000	50944200000	73400900000	147012000000	-45729800000	95288700000	495830000000000
-8.75	-333901000000	-128894000000	-49644900000	-88083300000	-27328800000	-1423940000000	-88883200000	-510295000000	9289900000	72610000000	497170000000000
-8.5	187426000000	361671000000	-170435000000	-66154600000	-152250000	556388000000	6578000000	-510295000000	23090700000	72610000000	504232000000000
-8.25	-605897000000	116389000000	-49644900000	-153869000000	-81681900000	140232000000	16124100000	197574000000	-32005500000	197343000000	499558000000000
-8	-243235000000	-47132700000	191936000000	-77119000000	-36387600000	-1959810000000	25670200000	-560857000000	26437700000	83949400000	503115000000000
-7.75	-220569000000	-390528000000	-137492000000	164097000000	-72623000000	-596983000000	44762500000	-459732000000	-35291300000	83949400000	497788000000000
-7.5	74094300000	-161598000000	-126511000000	-120976000000	17965400000	89160300000	-22060400000	-358608000000	-14781200000	-6765500000	496483000000000
-7.25	187426000000	-112541000000	126050000000	-120976000000	-45446500000	-4295170000000	-88883200000	-409170000000	-83555900000	38591900000	502943000000000
-7	323424000000	-390528000000	-16702100000	54453200000	-27328800000	315044000000	-2968120000	-105798000000	-28475000000	-29444200000	499627000000000
-6.75	-107237000000	34628100000	-71606700000	-368549000	-152250000	1462340000000	-98429300000	96450300000	-25097400000	-86141000000	501998000000000
-6.5	-129903000000	50980300000	-115530000000	-66154600000	-63564200000	1314960000000	-174798000000	96450300000	26483600000	-52122900000	498751000000000
-6.25	-333901000000	-112541000000	-126511000000	-99047700000	-99799600000	-180547000000	-12514200000	-661981000000	-14765900000	-18104900000	503751000000000
-6	51427900000	-227007000000	-170435000000	32524500000	17965400000	-836093000000	-88883200000	96450300000	74641100000	-97480400000	503493000000000
-5.75	96760700000	-128894000000	158993000000	-241584000000	-90740700000	1672120000000	-50698700000	-510295000000	-42245200000	-52122900000	494713000000000
-5.5	74094300000	-832037000000	-82587700000	-241584000000	-54505300000	-2738950000000	6578000000	-206922000000	43753700000	-18104900000	497565000000000
-5.25	-16571200000	100037000000	-137492000000	43488800000	-90740700000	-531760000000	-41152600000	248137000000	67717800000	72610000000	502273000000000
-5	-560564000000	149093000000	-71606700000	-329299000000	-27328800000	-1060890000000	-107975000000	-156360000000	-21704600000	-63462300000	503373000000000
-4.75	-288568000000	-63484900000	-38664000000	65417500000	-72623000000	-2315970000000	-60244900000	753757000000	-52668500000	-63462300000	503785000000000
-4.5	572755000000	-210654000000	-82587700000	-88083300000	45142000000	-708690000000	-165252000000	1815560000000	67840100000	-63462300000	500417000000000
-4.25	28761500000	-112541000000	-104550000000	131204000000	-36387600000	-1660960000000	35216400000	-4673810000	60840300000	4573860000	502531000000000
-4	-401900000000	-177950000000	-71606700000	-66154600000	8906600000	-67530600000	63854700000	147012000000	43661900000	-63462300000	501173000000000
-3.75	-39237600000	18276000000	126050000000	-186762000000	45142000000	-2538440000000	35216400000	-358608000000	-73255000000	4573860000	501414000000000
-3.5	-311234000000	181798000000	-60625800000	317598000000	8906600000	3589550000000	-50698700000	-4673810000	12728600000	15913200000	495039000000000
-3.25	-16571200000	-96189200000	49183500000	142168000000	-99799600000	678290000000	-31606500000	96450300000	60947300000	15913200000	500727000000000
-3	278092000000	-259711000000	-60625800000	-120976000000	-72623000000	302761000000	63854700000	197574000000	-73300900000	61270700000	500847000000000
-2.75	96760700000	67332500000	-192397000000	-296406000000	63259700000	641383000000	-155706000000	-257484000000	-86964000000	-63462300000	500125000000000
-2.5	-129903000000	-243359000000	-104550000000	120239000000	8906600000	-2564650000000	-2968120000	-156360000000	-69816200000	27252600000	498252000000000
-2.25	-492565000000	116389000000	-16702100000	65417500000	-81681900000	1306540000000	16124100000	-409170000000	-111112000000	-120159000000	494799000000000
-2	-197902000000	18276000000	-115530000000	-197727000000	-99799600000	-240798000000	-184344000000	-4673810000	33345700000	49931300000	499249000000000
-1.75	278092000000	34628100000	5259770000	-110012000000	8906600000	4871830000000	-88883200000	-257484000000	-7964930000	-18104900000	493355000000000
-1.5	187426000000	165445000000	82126300000	65417500000	54200800000	-3590690000000	-155706000000	-560857000000	26544700000	-18104900000	502359000000000
-1.25	-107237000000	100037000000	137031000000	-44225900000	-63564200000	-1294320000000	-165252000000	-308046000000	12759200000	-74801700000	503338000000000
-1	51427900000	-488641000000	-60625800000	32524500000	-36387600000	-2220220000000	-69791000000	551509000000	-14827100000	61270700000	501380000000000
-0.75	-220569000000	-521346000000	115069000000	43488800000	-27328800000	-3322250000000	-117522000000	-156360000000	133145000000	-86141000000	498235000000000
-0.5	731419000000	2454750000000	795887000000	1951290000000	371261000000	13289300000000	550707000000	1158250000000	23151900000	95288700000	483218000000000
-0.25	436756000000	1440910000000	422535000000	2718790000000	253496000000	10104900000000	617530000000	1411060000000	81671500000	61270700000	489008000000000
0	708753000000	1277390000000	411554000000	2400820000000	380319000000	9285770000000	703445000000	2422310000000	12805100000	129307000000	489764000000000
0.25	731419000000	1539030000000	246840000000	2411790000000	307849000000	9397960000000	483884000000	3382990000000	95395800000	72610000000	484386000000000
0.5	187426000000	1391860000000	378611000000	2916150000000	425614000000	7308330000000	703445000000	4444790000000	64432000000	15913200000	484094000000000
0.75	799418000000	1489970000000	312726000000	2378890000000	543379000000	8378390000000	751175000000	3989730000000	67916600000	27252600000	483424000000000
1	346091000000	1375510000000	378611000000	2576250000000	380319000000	5161650000000	751175000000	6770640000000	67855400000	83949400000	483046000000000
1.25	1275410000000	1604440000000	400573000000	2236360000000	561496000000	4124560000000	846637000000	6821210000000	67824800000	106628000000	483098000000000
1.5	776752000000	917645000000	587249000000	2784580000000	643026000000	8248600000000	827544000000	6972890000000	209027000000	49931300000	484489000000000
1.75	436756000000	1048460000000	521364000000	2422750000000	561496000000	8148080000000	1448040000000	7984130000000	174747000000	106628000000	481809000000000
2	527422000000	770476000000	334688000000	2269250000000	597732000000	4576800000000	1190300000000	8742570000000	126390000000	49931300000	485572000000000
2.25	482089000000	1179280000000	367631000000	2346000000000	552438000000	5781590000000	1285760000000	7883010000000	47314800000	49931300000	482754000000000
2.5	527422000000	525193000000	356650000000	2477570000000	579614000000	7408040000000	1371670000000	9349310000000	216042000000	4573860000	483974000000000
2.75	1071420000000	917645000000	433516000000	2039000000000	298790000000	5196980000000	1562600000000	9551560000000	126650000000	49931300000	483372000000000
3	708753000000	1032110000000	521364000000	2258290000000	597732000000	5323940000000	1495770000000	9248190000000	112681000000	129307000000	486242000000000
3.25	912750000000	1473620000000	323707000000	1951290000000	416555000000	5059570000000	1495770000000	9804370000000	229858000000	129307000000	482221000000000
3.5	708753000000	835884000000	82126300000	2181540000000	516202000000	2155340000000	1428950000000	10765000000000	226266000000	95288700000	485417000000000
3.75	278092000000	721419000000	455478000000	2422750000000	742673000000	4041860000000	1362130000000	9602120000000	192093000000	117967000000	482823000000000
4	595421000000	803180000000	466459000000	2313110000000	679261000000	4966720000000	1591230000000	11826900000000	205787000000	95288700000	486019000000000
4.25	663420000000	623306000000	301745000000	1863570000000	461849000000	3963850000000	1524410000000	11624600000000	233297000000	61270700000	481242000000000
4.5	1184750000000	427080000000	312726000000	1841640000000	588673000000	3261780000000	1533960000000	12534700000000	260791000000	83949400000	484902000000000
4.75	459423000000	803180000000	477440000000	1578500000000	688320000000	3732570000000	2106720000000	10057200000000	236858000000	61270700000	485125000000000
5	210093000000	786828000000	38202600000	1896460000000	434672000000	1584830000000	1696240000000	12079700000000	271459000000	83949400000	484249000000000
5.25	618087000000	1032110000000	246840000000	1611390000000	570555000000	-779029000000	2039900000000	12888700000000	233450000000	140646000000	485297000000000
5.5	368757000000	754124000000	455478000000	1600430000000	633967000000	4613870000000	1887160000000	11017900000000	264429000000	231361000000	478939000000000
5.75	640754000000	590602000000	499402000000	1589460000000	507143000000	3553500000000	1839430000000	12635800000000	240388000000	129307000000	480417000000000
6	368757000000	639658000000	279783000000	1348250000000	552438000000	2627650000000	2030360000000	10562800000000	150752000000	151986000000	481654000000000
6.25	1094080000000	803180000000	213897000000	2028040000000	498084000000	4031120000000	1763060000000	11826900000000	336688000000	220022000000	482187000000000
6.5	1003420000000	312615000000	301745000000	1644280000000	797026000000	1091470000000	2183090000000	13950500000000	364275000000	231361000000	478665000000000
6.75	980750000000	999406000000	235859000000	1732000000000	824203000000	3227400000000	2249920000000	12585300000000	312617000000	197343000000	478012000000000
7	368757000000	754124000000	378611000000	1479820000000	697379000000	3780180000000	2326290000000	12838100000000	305893000000	140646000000	484232000000000
7.25	278092000000	901293000000	323707000000	2093820000000	615849000000	1998800000000	2249920000000	11270700000000	347173000000	129307000000	481809000000000
7.5	776752000000	819532000000	191936000000	1830680000000	932909000000	-9980100000	2526750000000	12130200000000	343688000000	72610000000	480228000000000
7.75	1116750000000	672363000000	433516000000	1600430000000	615849000000	2940390000000	2230820000000	14253800000000	419432000000	49931300000	483321000000000
8	1207410000000	737771000000	246840000000	1929360000000	597732000000	-1755940000000	2354920000000	13495400000000	412646000000	186004000000	484524000000000
8.25	618087000000	394376000000	268802000000	1863570000000	951027000000	2464380000000	2001720000000	12787500000000	357535000000	61270700000	483957000000000
8.5	391424000000	656011000000	356650000000	1863570000000	842321000000	4478360000000	2183090000000	13394300000000	374881000000	163325000000	482548000000000
8.75	255425000000	966702000000	411554000000	2082860000000	606791000000	3388890000000	2183090000000	13950500000000	326464000000	174664000000	479472000000000
9	776752000000	345319000000	345669000000	1479820000000	815144000000	2410220000000	2593580000000	12332500000000	378305000000	333415000000	484592000000000
9.25	164760000000	574250000000	367631000000	1819710000000	815144000000	3061220000000	2479020000000	12838100000000	526598000000	140646000000	477857000000000
9.5	731419000000	378024000000	378611000000	1786820000000	534320000000	835308000000	2689040000000	13242600000000	436763000000	276719000000	481568000000000
9.75	640754000000	1064810000000	422535000000	1096070000000	742673000000	479181000000	2536300000000	13748200000000	471334000000	129307000000	484369000000000
10	867418000000	933997000000	49183500000	1885500000000	652085000000	2871970000000	2412200000000	14405500000000	540231000000	265379000000	474025000000000
10.25	686087000000	459785000000	367631000000	1710070000000	905733000000	798666000000	2746310000000	14456100000000	464671000000	197343000000	481190000000000
10.5	731419000000	1228340000000	334688000000	1414030000000	824203000000	1244100000000	2545850000000	13546000000000	447248000000	197343000000	483183000000000
10.75	731419000000	1146580000000	202917000000	1556570000000	697379000000	970653000000	2727220000000	13090900000000	505997000000	163325000000	485194000000000
11	890084000000	868589000000	334688000000	1808750000000	869497000000	651067000000	3004060000000	14860600000000	485410000000	186004000000	480915000000000
11.25	1479410000000	819532000000	510383000000	1688140000000	905733000000	171128000000	2584030000000	12433600000000	530236000000	220022000000	481397000000000
11.5	1230080000000	737771000000	279783000000	1830680000000	679261000000	4766450000000	2860870000000	12281900000000	571271000000	117967000000	480262000000000
11.75	980750000000	590602000000	104088000000	1622350000000	887615000000	4969760000000	2870410000000	12635800000000	495589000000	83949400000	478046000000000
12	618087000000	917645000000	323707000000	1523680000000	987262000000	803638000000	3004060000000	13798800000000	667908000000	174664000000	481173000000000
12.25	527422000000	999406000000	565287000000	1721030000000	932909000000	1310580000000	2822680000000	13090900000000	492303000000	151986000000	484524000000000
12.5	1434080000000	852237000000	235859000000	1578500000000	833262000000	65893800000	3156800000000	13596500000000	536838000000	401451000000	478957000000000
12.75	595421000000	966702000000	444497000000	1721030000000	806085000000	542936000000	2851320000000	13596500000000	650408000000	163325000000	477084000000000
13	414090000000	884941000000	137031000000	1589460000000	697379000000	-288188000000	2555390000000	14203300000000	609281000000	49931300000	478218000000000
13.25	1230080000000	868589000000	268802000000	1611390000000	670203000000	630650000000	3242710000000	12888700000000	715927000000	186004000000	480537000000000
13.5	595421000000	378024000000	235859000000	1567530000000	951027000000	4232310000000	2822680000000	13647100000000	554399000000	208682000000	478183000000000
13.75	799418000000	525193000000	137031000000	1940320000000	588673000000	-222407000000	3147250000000	14506600000000	843788000000	140646000000	485280000000000
14	572755000000	1424560000000	455478000000	1370170000000	896674000000	2956580000000	3118610000000	14961700000000	764712000000	265379000000	480125000000000
14.25	1139410000000	443432000000	301745000000	1403070000000	787968000000	1791260000000	2698580000000	13090900000000	630372000000	83949400000	480451000000000
14.5	708753000000	1048460000000	202917000000	1622350000000	969145000000	-1086850000000	3099520000000	14355000000000	723264000000	276719000000	480417000000000
14.75	686087000000	999406000000	422535000000	1797780000000	896674000000	2806640000000	3061340000000	12585300000000	712779000000	197343000000	481036000000000
15	958083000000	1195630000000	378611000000	1370170000000	1014440000000	-1005460000000	3233170000000	14304400000000	761013000000	344755000000	480640000000000
15.25	572755000000	901293000000	312726000000	1764890000000	914791000000	259843000000	3443180000000	13899900000000	853905000000	163325000000	481482000000000
15.5	278092000000	966702000000	389592000000	2126710000000	987262000000	-1081370000000	3166340000000	11928000000000	795538000000	163325000000	478716000000000
15.75	867418000000	1032110000000	169974000000	1753930000000	960086000000	-460295000000	2908600000000	11978500000000	771513000000	367433000000	484644000000000
16	550088000000	933997000000	784906000000	1260530000000	824203000000	1067440000000	2975420000000	14051600000000	771498000000	254040000000	482616000000000
16.25	1275410000000	1228340000000	389592000000	1622350000000	896674000000	3268960000000	2946780000000	13748200000000	809278000000	163325000000	474111000000000
16.5	482089000000	786828000000	268802000000	1205710000000	941968000000	957475000000	3156800000000	14152700000000	840334000000	333415000000	478287000000000
16.75	958083000000	688715000000	532344000000	1512710000000	1123140000000	668837000000	3061340000000	15113400000000	795768000000	254040000000	479060000000000
17	1320750000000	1195630000000	246840000000	2170570000000	860438000000	-60772900000	3147250000000	14355000000000	885282000000	163325000000	478441000000000
17.25	618087000000	1015760000000	246840000000	1907430000000	960086000000	-617968000000	3395450000000	12635800000000	944031000000	220022000000	474816000000000
17.5	1343410000000	1506320000000	444497000000	1710070000000	896674000000	-999440000000	3357270000000	14405500000000	802431000000	72610000000	480451000000000
17.75	346091000000	1048460000000	631173000000	1337280000000	1059730000000	208506000000	3099520000000	16529100000000	768166000000	356094000000	478183000000000
18	618087000000	1310100000000	543325000000	1863570000000	1050670000000	480418000000	3099520000000	13394300000000	905899000000	208682000000	479094000000000
18.25	867418000000	754124000000	389592000000	2126710000000	869497000000	1532680000000	3643650000000	14759500000000	850497000000	333415000000	478149000000000
18.5	1388740000000	1081170000000	158993000000	1973210000000	951027000000	-250323000000	3777300000000	11776300000000	940393000000	435470000000	472256000000000
18.75	1003420000000	770476000000	444497000000	1403070000000	769850000000	643169000000	3662740000000	13444800000000	861241000000	288058000000	477410000000000
19	1026080000000	1064810000000	400573000000	1786820000000	896674000000	552658000000	3720020000000	15113400000000	902414000000	265379000000	480022000000000
19.25	1048750000000	1048460000000	444497000000	1732000000000	1105030000000	674839000000	3529100000000	13495400000000	940531000000	424130000000	477805000000000
19.5	1207410000000	835884000000	148012000000	1710070000000	932909000000	1924410000000	3739110000000	13293200000000	971479000000	254040000000	476963000000000
19.75	550088000000	1097520000000	466459000000	1775860000000	878556000000	-89045100000	3939580000000	14607800000000	899128000000	231361000000	477754000000000
20	867418000000	901293000000	400573000000	1381140000000	969145000000	2320050000000	3662740000000	14355000000000	950709000000	242700000000	473802000000000
20.25	822085000000	1097520000000	521364000000	2006110000000	1041620000000	1577130000000	3529100000000	14607800000000	964541000000	333415000000	475640000000000
20.5	1162080000000	1113870000000	466459000000	1512710000000	1005380000000	-972034000000	3395450000000	12079700000000	995933000000	322076000000	475142000000000
20.75	776752000000	933997000000	543325000000	1742960000000	1023500000000	2605040000000	3586370000000	13748200000000	961347000000	469488000000	474163000000000
21	822085000000	1489970000000	334688000000	1512710000000	1032560000000	1345540000000	3786840000000	13394300000000	1064690000000	106628000000	476104000000000
21.25	754086000000	1375510000000	323707000000	1732000000000	905733000000	2528650000000	4111410000000	14253800000000	1143710000000	276719000000	476053000000000
21.5	867418000000	983054000000	356650000000	1753930000000	960086000000	-75217000000	4245060000000	13849300000000	995596000000	208682000000	474678000000000
21.75	731419000000	1718900000000	554306000000	2060930000000	1014440000000	2768670000000	3615010000000	13293200000000	871695000000	412791000000	479541000000000
22	1071420000000	1293750000000	334688000000	1578500000000	1059730000000	1911820000000	3815480000000	15214500000000	1030230000000	72610000000	474764000000000
22.25	754086000000	1767960000000	268802000000	1677180000000	932909000000	2970670000000	3815480000000	15568400000000	1061220000000	186004000000	477273000000000
22.5	935417000000	1326450000000	191936000000	1808750000000	1105030000000	-153136000000	4044590000000	16478600000000	1126570000000	322076000000	479489000000000
22.75	640754000000	1261040000000	411554000000	1611390000000	1150320000000	2477370000000	3863210000000	13950500000000	1026680000000	242700000000	477015000000000
23	1116750000000	1211980000000	499402000000	1567530000000	1286200000000	3954640000000	3930030000000	14001000000000	950985000000	412791000000	477685000000000
23.25	754086000000	1130220000000	477440000000	1655250000000	1005380000000	648126000000	3538640000000	13697600000000	978647000000	310737000000	476328000000000
23.5	686087000000	1784310000000	642154000000	1819710000000	1159380000000	424374000000	3949130000000	13090900000000	971541000000	288058000000	476036000000000
23.75	1570080000000	1751610000000	257821000000	2214430000000	1132200000000	1123900000000	3739110000000	15214500000000	1185410000000	242700000000	477599000000000
24	414090000000	1539030000000	466459000000	2126710000000	987262000000	-2760700000000	4187780000000	12888700000000	1288650000000	231361000000	476053000000000
24.25	776752000000	983054000000	290764000000	1753930000000	1123140000000	1041930000000	3853660000000	13950500000000	1223350000000	276719000000	472668000000000
24.5	935417000000	1032110000000	411554000000	1753930000000	1023500000000	3473880000000	3786840000000	14355000000000	1064720000000	129307000000	475366000000000
24.75	550088000000	1179280000000	257821000000	2400820000000	1186560000000	-816845000000	3949130000000	14557200000000	1216470000000	401451000000	475503000000000
25	1139410000000	999406000000	477440000000	2247320000000	1195620000000	-321932000000	4101860000000	13950500000000	1243930000000	344755000000	479232000000000
25.25	504756000000	1506320000000	488421000000	2181540000000	1123140000000	299267000000	4006400000000	14102100000000	1016290000000	412791000000	474730000000000
25.5	1184750000000	1342800000000	521364000000	2115750000000	1077850000000	308195000000	4092320000000	14102100000000	1261140000000	265379000000	476998000000000
25.75	844751000000	1277390000000	477440000000	1775860000000	1068790000000	950327000000	4149590000000	14759500000000	1181900000000	390112000000	472256000000000
26	844751000000	1817010000000	488421000000	2203470000000	1268090000000	2304150000000	4130500000000	14557200000000	1202640000000	514845000000	478287000000000
26.25	1162080000000	1064810000000	455478000000	1962250000000	1313380000000	914479000000	4225960000000	14607800000000	1230230000000	186004000000	472548000000000
26.5	686087000000	1064810000000	334688000000	1874530000000	1313380000000	135472000000	4082770000000	15062800000000	1116640000000	310737000000	476585000000000
26.75	1502080000000	1817010000000	400573000000	1797780000000	1204670000000	2479420000000	3968220000000	14304400000000	1154590000000	537524000000	473475000000000
27	958083000000	1539030000000	466459000000	2159610000000	1331500000000	374626000000	4311880000000	13647100000000	1374850000000	231361000000	474077000000000
27.25	844751000000	1522680000000	642154000000	2039000000000	1032560000000	-505981000000	4416890000000	15163900000000	1354310000000	242700000000	473475000000000
27.5	1003420000000	1686200000000	719020000000	2060930000000	1105030000000	125851000000	4273690000000	16124600000000	1340420000000	288058000000	481104000000000
27.75	1094080000000	1767960000000	334688000000	2225390000000	1150320000000	1223530000000	4388250000000	15416800000000	1571410000000	356094000000	472152000000000
28	1139410000000	1964180000000	433516000000	1490780000000	1050670000000	-804076000000	4063680000000	15113400000000	1405880000000	254040000000	471534000000000
28.25	980750000000	1146580000000	466459000000	2082860000000	1005380000000	-994040000000	4340520000000	15062800000000	1168010000000	537524000000	473424000000000
28.5	663420000000	1162930000000	587249000000	1721030000000	1132200000000	621178000000	4712820000000	12989800000000	1399200000000	412791000000	476757000000000
28.75	935417000000	1424560000000	543325000000	1885500000000	1095970000000	623782000000	4645990000000	14355000000000	1461000000000	480827000000	475795000000000
29	595421000000	1113870000000	466459000000	2115750000000	1240910000000	935469000000	4531440000000	13242600000000	1419570000000	469488000000	476568000000000
29.25	595421000000	1604440000000	400573000000	2247320000000	1168440000000	1001690000000	4598260000000	13647100000000	1337160000000	480827000000	477685000000000
29.5	799418000000	1735250000000	345669000000	2335040000000	1114090000000	1116810000000	3891850000000	14456100000000	1537170000000	446809000000	475829000000000
29.75	686087000000	1457270000000	477440000000	1995140000000	1150320000000	1530810000000	4120960000000	14810000000000	1309740000000	424130000000	475520000000000
30	1706070000000	1653490000000	609211000000	2039000000000	1177500000000	2142140000000	4292790000000	12838100000000	1368710000000	390112000000	476379000000000
30.25	1048750000000	1637140000000	609211000000	1973210000000	1141260000000	-2273700000000	4311880000000	14810000000000	1402940000000	310737000000	475211000000000
30.5	1003420000000	1097520000000	598230000000	2356970000000	1159380000000	1004770000000	4655540000000	14152700000000	1381930000000	458148000000	472908000000000
30.75	1343410000000	2193110000000	488421000000	1929360000000	1539850000000	1266210000000	4359610000000	13849300000000	1613060000000	435470000000	473407000000000
31	799418000000	2160410000000	817849000000	2214430000000	1195620000000	1810810000000	4455070000000	14456100000000	1536980000000	458148000000	474833000000000
31.25	822085000000	1784310000000	433516000000	2247320000000	1222790000000	-708213000000	4378700000000	14607800000000	1399370000000	571542000000	477651000000000
31.5	776752000000	1898780000000	751963000000	2400820000000	1539850000000	3053590000000	4130500000000	14961700000000	1395700000000	424130000000	474575000000000
31.75	618087000000	1882420000000	510383000000	2236360000000	1349620000000	1467700000000	3844120000000	13343700000000	1561170000000	208682000000	472823000000000
32	980750000000	1440910000000	576268000000	2203470000000	1268090000000	-1977940000000	4856010000000	14506600000000	1643990000000	288058000000	478338000000000
32.25	822085000000	1849720000000	444497000000	1753930000000	1358680000000	2776940000000	4369160000000	13495400000000	1350890000000	469488000000	471774000000000
32.5	1275410000000	1980540000000	279783000000	1962250000000	1077850000000	1327720000000	4397790000000	13950500000000	1451390000000	401451000000	474764000000000
32.75	1048750000000	1931480000000	576268000000	2203470000000	1358680000000	1073020000000	4665090000000	16124600000000	1523530000000	401451000000	469420000000000
33	1003420000000	1767960000000	499402000000	2060930000000	1376790000000	1637750000000	4789180000000	15871800000000	1468230000000	548863000000	468871000000000
33.25	1139410000000	950350000000	653135000000	1995140000000	1440200000000	1134820000000	4731910000000	13090900000000	1592290000000	412791000000	472067000000000
33.5	1252750000000	1326450000000	686078000000	2115750000000	1231850000000	1527120000000	4426430000000	14810000000000	1588820000000	378773000000	473458000000000
33.75	618087000000	1898780000000	576268000000	2049960000000	1249970000000	310241000000	4474160000000	14405500000000	1471780000000	605560000000	473458000000000
34	686087000000	1457270000000	598230000000	1896460000000	1032560000000	1881950000000	5056480000000	13546000000000	1450780000000	480827000000	471671000000000
34.25	1343410000000	2242170000000	653135000000	2653000000000	1376790000000	-84130900000	4674630000000	15163900000000	1536950000000	424130000000	473475000000000
34.5	1343410000000	1686200000000	433516000000	2642040000000	1385850000000	1583880000000	4798730000000	15669600000000	1561520000000	401451000000	471860000000000
34.75	754086000000	1539030000000	642154000000	2653000000000	1240910000000	1297390000000	4684180000000	12534700000000	1440810000000	208682000000	476551000000000
35	912750000000	1457270000000	631173000000	2291180000000	1467380000000	2428610000000	5018290000000	13849300000000	1499430000000	401451000000	470623000000000
35.25	436756000000	2471100000000	488421000000	1600430000000	1313380000000	275481000000	4426430000000	12534700000000	1540340000000	616899000000	476774000000000
35.5	844751000000	1375510000000	609211000000	2258290000000	1331500000000	2478620000000	4493260000000	14102100000000	1637200000000	503506000000	472805000000000
35.75	708753000000	2242170000000	367631000000	2389860000000	1394910000000	306107000000	4483710000000	14557200000000	1651000000000	537524000000	477341000000000
36	1003420000000	1833370000000	565287000000	2751680000000	1403970000000	-2292780000000	4875100000000	14759500000000	1674980000000	458148000000	477015000000000
36.25	890084000000	2111350000000	367631000000	2455650000000	1313380000000	-899838000000	4980110000000	13394300000000	1557960000000	537524000000	472874000000000
36.5	1207410000000	2078650000000	784906000000	2313110000000	1177500000000	1525250000000	4836920000000	15416800000000	1668270000000	480827000000	470829000000000
36.75	1116750000000	1637140000000	521364000000	2148640000000	1585150000000	492071000000	4474160000000	15012300000000	1695590000000	469488000000	469970000000000
37	935417000000	1980540000000	686078000000	2280220000000	1222790000000	4044080000000	4483710000000	14607800000000	1575550000000	526184000000	473115000000000
37.25	822085000000	1686200000000	488421000000	2060930000000	1431150000000	-1380840000000	4512350000000	13647100000000	1640640000000	469488000000	472462000000000
37.5	618087000000	1817010000000	323707000000	2378890000000	1268090000000	1004780000000	4521890000000	14152700000000	1702830000000	514845000000	473974000000000
37.75	1252750000000	1947830000000	455478000000	2400820000000	1422090000000	-2702950000000	4770090000000	15972900000000	1475170000000	322076000000	470022000000000
38	1796740000000	1653490000000	367631000000	2247320000000	1503620000000	3316250000000	5600610000000	14759500000000	1661440000000	560203000000	468733000000000
38.25	1162080000000	1996890000000	686078000000	2247320000000	1431150000000	2520980000000	5180580000000	13141500000000	1709070000000	537524000000	469575000000000
38.5	1116750000000	1915130000000	686078000000	2324070000000	1503620000000	3274930000000	5027840000000	16124600000000	1772030000000	401451000000	470726000000000
38.75	663420000000	2291230000000	730001000000	2389860000000	1376790000000	2098140000000	4798730000000	13495400000000	1826990000000	537524000000	474008000000000
39	980750000000	2127710000000	598230000000	2510470000000	1367730000000	1564540000000	4407340000000	14557200000000	1723310000000	639578000000	473441000000000
39.25	1071420000000	2389340000000	576268000000	2313110000000	1295260000000	1621550000000	5151940000000	13849300000000	1799540000000	367433000000	471001000000000
39.5	754086000000	2732740000000	631173000000	2280220000000	1240910000000	1002410000000	4884650000000	14708900000000	1734020000000	560203000000	473029000000000
39.75	1184750000000	1947830000000	762944000000	2236360000000	1385850000000	-3560140000000	5256940000000	13697600000000	1851030000000	684935000000	478647000000000
40	686087000000	2111350000000	532344000000	2477570000000	1005380000000	-540563000000	5027840000000	13697600000000	1864820000000	378773000000	470623000000000
40.25	1456740000000	1489970000000	609211000000	2642040000000	1340560000000	-1067550000000	4951470000000	15315600000000	1792590000000	662257000000	475640000000000
40.5	867418000000	2291230000000	872753000000	2532400000000	1413030000000	2531680000000	4684180000000	14607800000000	1947470000000	514845000000	468080000000000
40.75	1026080000000	2618270000000	762944000000	2258290000000	1512680000000	-1755840000000	5276040000000	13546000000000	1737290000000	582881000000	473029000000000
41	980750000000	1980540000000	499402000000	2093820000000	1621380000000	3069510000000	5027840000000	14607800000000	1713380000000	514845000000	471156000000000
41.25	1094080000000	1849720000000	664116000000	2499500000000	1503620000000	-2423470000000	4617350000000	15619000000000	1812820000000	390112000000	468888000000000
41.5	1162080000000	1751610000000	466459000000	2795540000000	1231850000000	2110920000000	5151940000000	15770700000000	1750850000000	333415000000	471104000000000
41.75	1388740000000	2078650000000	444497000000	2192500000000	1403970000000	1460130000000	5266490000000	15517900000000	1779030000000	503506000000	473802000000000
42	1184750000000	2340280000000	861772000000	2477570000000	1376790000000	336882000000	5285580000000	14051600000000	1768300000000	514845000000	469609000000000
42.25	1026080000000	1751610000000	784906000000	2159610000000	1431150000000	3518290000000	5180580000000	15012300000000	1912580000000	390112000000	469661000000000
42.5	1275410000000	2029590000000	576268000000	2422750000000	1675730000000	1087970000000	5237850000000	12332500000000	1954450000000	537524000000	471500000000000
42.75	776752000000	2389340000000	740982000000	2499500000000	1394910000000	-215505000000	5581510000000	13849300000000	1847590000000	492166000000	473201000000000
43	980750000000	1653490000000	488421000000	2378890000000	1539850000000	738550000000	5046930000000	14911100000000	1954550000000	639578000000	467324000000000
43.25	1048750000000	2307580000000	433516000000	2324070000000	1512680000000	1403800000000	5486050000000	12939200000000	1926610000000	526184000000	469455000000000
43.5	867418000000	1898780000000	784906000000	2367930000000	1385850000000	-3264270000000	5323770000000	15012300000000	1799440000000	367433000000	470280000000000
43.75	1366080000000	2029590000000	609211000000	3036760000000	1666680000000	-2846810000000	5094660000000	13950500000000	1944120000000	310737000000	475005000000000
44	1139410000000	2454750000000	719020000000	2488540000000	1603260000000	1448330000000	5409680000000	14405500000000	1882390000000	571542000000	472273000000000
44.25	844751000000	2683680000000	784906000000	2576250000000	1403970000000	616384000000	5247400000000	15619000000000	1893000000000	492166000000	470606000000000
44.5	935417000000	1964180000000	675097000000	2411790000000	1530790000000	-1226710000000	5066020000000	13899900000000	1820440000000	412791000000	471929000000000
44.75	1162080000000	2242170000000	697058000000	2674930000000	1449260000000	1374770000000	5409680000000	14607800000000	1885690000000	639578000000	470228000000000
45	1479410000000	2389340000000	510383000000	2148640000000	1222790000000	3672190000000	5247400000000	15062800000000	1913540000000	662257000000	471036000000000
45.25	504756000000	2274880000000	697058000000	2620110000000	1748210000000	-1408810000000	5314220000000	14405500000000	1923600000000	639578000000	474128000000000
45.5	1479410000000	2356640000000	784906000000	2433720000000	1295260000000	520680000000	5018290000000	15113400000000	1768700000000	480827000000	476207000000000
45.75	1207410000000	2585570000000	631173000000	2389860000000	1548910000000	-219711000000	5762890000000	15366200000000	1833720000000	503506000000	471757000000000
46	1094080000000	2781790000000	719020000000	2411790000000	1639500000000	-708079000000	5304680000000	13748200000000	1951110000000	446809000000	468286000000000
46.25	1162080000000	2945310000000	806868000000	2620110000000	1494560000000	195342000000	5657880000000	15821300000000	1878540000000	594221000000	472341000000000
46.5	1026080000000	1833370000000	751963000000	2565290000000	1277150000000	-656448000000	5543330000000	11978500000000	1899300000000	446809000000	473939000000000
46.75	1660740000000	1996890000000	675097000000	2576250000000	1802560000000	3642300000000	4951470000000	14355000000000	2140360000000	650917000000	466877000000000
47	1003420000000	2258520000000	686078000000	2609150000000	1413030000000	1544280000000	5247400000000	13546000000000	1930170000000	526184000000	465829000000000
47.25	754086000000	2454750000000	938639000000	2872290000000	1684790000000	3142750000000	4693720000000	14203300000000	1813480000000	730293000000	468716000000000
47.5	1003420000000	1817010000000	675097000000	2378890000000	1666680000000	2261640000000	5276040000000	12281900000000	1944320000000	435470000000	469798000000000
47.75	1343410000000	2700030000000	719020000000	2598180000000	1757260000000	1809390000000	5724700000000	16326900000000	1888770000000	458148000000	466259000000000
48	1366080000000	2634620000000	543325000000	2729750000000	1693850000000	-1060230000000	4789180000000	13697600000000	2109930000000	673596000000	474438000000000
48.25	527422000000	2454750000000	708039000000	2718790000000	1340560000000	-2075890000000	5304680000000	14759500000000	1968590000000	390112000000	472565000000000
48.5	1343410000000	2193110000000	839811000000	3091580000000	1847850000000	816027000000	5533780000000	12737000000000	2137150000000	412791000000	468458000000000
48.75	844751000000	2536510000000	697058000000	2751680000000	1612320000000	-1615800000000	5533780000000	12635800000000	1941190000000	616899000000	475348000000000
49	572755000000	2650980000000	565287000000	2367930000000	1775380000000	-359734000000	5466960000000	14355000000000	2058060000000	514845000000	470503000000000
49.25	1207410000000	2242170000000	587249000000	2839400000000	1449260000000	1129790000000	5524240000000	14355000000000	1933960000000	707614000000	467823000000000
49.5	935417000000	2323930000000	642154000000	2609150000000	1603260000000	-1623470000000	6039730000000	14051600000000	2161530000000	821008000000	468871000000000
49.75	890084000000	2422040000000	806868000000	2762650000000	1893150000000	953196000000	5953810000000	14405500000000	1872080000000	639578000000	471517000000000
50	1706070000000	2667330000000	587249000000	2389860000000	1983740000000	1038480000000	5619700000000	12079700000000	2030490000000	628239000000	469764000000000
50.25	1275410000000	2601920000000	521364000000	2663970000000	1612320000000	-1516120000000	5648340000000	14607800000000	2175240000000	548863000000	473097000000000
50.5	1638070000000	2340280000000	543325000000	3003860000000	1693850000000	-1823620000000	5199670000000	17135900000000	2033900000000	492166000000	472702000000000
50.75	1207410000000	2422040000000	1015510000000	2872290000000	1530790000000	-144617000000	5715160000000	12231300000000	2182070000000	571542000000	470881000000000
51	1615410000000	2389340000000	839811000000	2762650000000	1702910000000	1858350000000	5886990000000	14001000000000	1985530000000	707614000000	468613000000000
51.25	1026080000000	2863550000000	971582000000	2598180000000	1684790000000	-187820000000	5762890000000	14506600000000	1992620000000	537524000000	469180000000000
51.5	1184750000000	2291230000000	762944000000	2707830000000	1367730000000	-981155000000	5696070000000	15012300000000	2061420000000	639578000000	477977000000000
51.75	708753000000	2536510000000	762944000000	2532400000000	1829740000000	1186860000000	5934720000000	13849300000000	2054610000000	548863000000	469644000000000
52	1116750000000	2798140000000	894715000000	2565290000000	1458320000000	196844000000	6011090000000	13444800000000	1927220000000	571542000000	467290000000000
52.25	572755000000	2798140000000	795887000000	3058680000000	1748210000000	-236480000000	5571970000000	14860600000000	2047450000000	616899000000	470245000000000
52.5	1071420000000	2945310000000	795887000000	3080610000000	1775380000000	2762790000000	5533780000000	13293200000000	2203110000000	582881000000	470365000000000
52.75	890084000000	2160410000000	708039000000	3025790000000	1721030000000	3788340000000	6392930000000	14759500000000	2161300000000	650917000000	467943000000000
53	912750000000	2650980000000	576268000000	2883250000000	1711970000000	742521000000	5562420000000	14759500000000	2109780000000	582881000000	470675000000000
53.25	1774070000000	2340280000000	806868000000	2543360000000	1902210000000	-3051780000000	5256940000000	13748200000000	2171900000000	480827000000	470554000000000
53.5	1366080000000	2405690000000	938639000000	3277970000000	1657620000000	361506000000	5886990000000	14001000000000	2033960000000	458148000000	471431000000000
53.75	1683410000000	2749090000000	817849000000	2609150000000	1847850000000	879897000000	5505140000000	13343700000000	2026840000000	492166000000	469695000000000
54	1434080000000	3092480000000	916677000000	2674930000000	1657620000000	3200060000000	5581510000000	15467300000000	2123880000000	503506000000	468630000000000
54.25	1592740000000	3157890000000	1070410000000	2784580000000	1476440000000	646259000000	5801070000000	12939200000000	2157810000000	673596000000	473699000000000
54.5	844751000000	2471100000000	828830000000	3058680000000	1893150000000	521888000000	5772440000000	14355000000000	2130730000000	662257000000	468802000000000
54.75	1116750000000	2814500000000	927658000000	2981930000000	1757260000000	-1595690000000	5056480000000	12332500000000	2333830000000	548863000000	472307000000000
55	799418000000	2242170000000	938639000000	2784580000000	1684790000000	-1584700000000	5724700000000	15669600000000	1947680000000	628239000000	472101000000000
55.25	1298080000000	2291230000000	1004520000000	3091580000000	1838790000000	-978710000000	5581510000000	14152700000000	1968680000000	367433000000	465297000000000
55.5	1683410000000	2634620000000	740982000000	2609150000000	1902210000000	-2257810000000	5801070000000	13950500000000	2220250000000	730293000000	469661000000000
55.75	1116750000000	2176760000000	1081390000000	2861330000000	1458320000000	811248000000	5562420000000	14051600000000	2119870000000	605560000000	463372000000000
56	958083000000	3288710000000	861772000000	3036760000000	1648560000000	-2756800000000	5505140000000	13040300000000	2182010000000	537524000000	474077000000000
56.25	1003420000000	2552860000000	784906000000	2653000000000	1793500000000	882279000000	5953810000000	14557200000000	2220140000000	560203000000	471706000000000
56.5	1366080000000	2340280000000	1103350000000	2773610000000	1657620000000	979042000000	6001540000000	13293200000000	2089220000000	480827000000	466998000000000
56.75	1456740000000	2536510000000	1004520000000	2905180000000	1784440000000	3553850000000	6488390000000	14961700000000	2172070000000	492166000000	467015000000000
57	1139410000000	2536510000000	960601000000	2609150000000	1675730000000	3335330000000	6011090000000	15366200000000	2202950000000	730293000000	466929000000000
57.25	1320750000000	2552860000000	883734000000	2587220000000	1893150000000	-539812000000	5591060000000	13697600000000	2199400000000	673596000000	468097000000000
57.5	1298080000000	2945310000000	730001000000	2992900000000	1603260000000	-1035430000000	6259290000000	13950500000000	2182710000000	786990000000	470091000000000
57.75	867418000000	3354120000000	971582000000	2674930000000	1639500000000	49023900000	6259290000000	12989800000000	2154390000000	684935000000	469987000000000
58	1683410000000	2961670000000	971582000000	2806500000000	1766320000000	-1422670000000	6259290000000	12332500000000	2296140000000	628239000000	475073000000000
58.25	1660740000000	2814500000000	971582000000	2861330000000	1875030000000	18633900000	6030180000000	13495400000000	2171830000000	786990000000	467513000000000
58.5	1547410000000	3223300000000	620192000000	3486290000000	1594210000000	-175566000000	5753340000000	12332500000000	2158090000000	639578000000	465829000000000
58.75	935417000000	3354120000000	686078000000	3124470000000	1666680000000	-120537000000	6154280000000	14203300000000	2123640000000	696275000000	471190000000000
59	1524740000000	3076130000000	960601000000	2839400000000	1884090000000	-149632000000	6221100000000	14152700000000	2309760000000	560203000000	467702000000000
59.25	1706070000000	2749090000000	1081390000000	2642040000000	1675730000000	908699000000	6154280000000	14152700000000	2096130000000	650917000000	470829000000000
59.5	1275410000000	2683680000000	905696000000	3058680000000	1693850000000	-996909000000	5886990000000	14152700000000	2227090000000	718954000000	474163000000000
59.75	1524740000000	2732740000000	697058000000	3124470000000	1838790000000	286074000000	5829710000000	13596500000000	2206450000000	526184000000	466757000000000
60	1207410000000	2356640000000	872753000000	2707830000000	1721030000000	-1491790000000	6354750000000	13090900000000	2178740000000	628239000000	472565000000000

## Sheet: 550K
Time (ms)	m/z 28 Ethene	m/z 30 Formaldehyde	m/z 56 Acrolein	m/z 70 (2,3-DHF & 2,5-DHF)	m/z 86 THF-3-one	m/z 71 ROO	m/z 58 butanedial	m/z 103 OOQOOH	Sum UHP + KHP	m/z 84	m/z 72 THF
-30	103459000000	371872000000	296780000000	-29092300000	-9622670000	-2256090000000	88081000000	262583000000	-31955500000	137883000000	500680000000000
-29.75	35439000000	-136592000000	-10132200000	36850300000	72170000000	258262000000	97627100000	464831000000	-32016700000	69846600000	497856000000000
-29.5	216826000000	552295000000	-262239000000	168735000000	8553480000	-33709700000	30804300000	60334600000	-28486200000	-66225700000	500404000000000
-29.25	-418028000000	568698000000	-130705000000	25859800000	53993900000	3543080000000	-7380190000	110897000000	-28608500000	35828600000	494895000000000
-29	80785800000	-136592000000	66596000000	-51073200000	44905800000	898840000000	-74203000000	-141914000000	-76613200000	1810490000	502040000000000
-28.75	80785800000	125841000000	-97821500000	124774000000	-9622670000	222032000000	88081000000	616517000000	-28409700000	149222000000	496152000000000
-28.5	284846000000	240656000000	77557100000	-117016000000	-534593000	-3257360000000	-26472400000	1476070000000	12748000000	81186000000	502935000000000
-28.25	-418028000000	60232900000	-163588000000	-193949000000	90346200000	-2580050000000	-26472400000	9772500000	26625300000	126543000000	496634000000000
-28	-350008000000	-563046000000	-21093300000	-149987000000	199403000000	2879960000000	221727000000	-596972000000	9278700000	35828600000	499320000000000
-27.75	352866000000	339068000000	-141666000000	14869400000	8553480000	-1529460000000	88081000000	-91351600000	-73205000000	-9528870000	501024000000000
-27.5	-32581100000	-70983800000	33712500000	-62063600000	81258100000	-2603970000000	212181000000	-394724000000	40319000000	24489200000	503142000000000
-27.25	262173000000	-38179600000	154285000000	102793000000	35817700000	999444000000	-55110800000	9772500000	12778600000	35828600000	500921000000000
-27	330193000000	-464634000000	-53976800000	-95034900000	-136856000000	2488620000000	173996000000	-647534000000	43727200000	-20868200000	493122000000000
-26.75	-32581100000	-21777600000	22751300000	25859800000	17641600000	1692480000000	145358000000	970452000000	-28532100000	-54886300000	499939000000000
-26.5	534253000000	27428700000	77557100000	124774000000	90346200000	4073330000000	-26472400000	-192476000000	16324400000	69846600000	497959000000000
-26.25	-259315000000	224254000000	66596000000	-40082700000	63081900000	-287295000000	68988800000	262583000000	-1068080000	149222000000	503486000000000
-26	-77927800000	257058000000	-108783000000	-106025000000	35817700000	-360084000000	49896500000	262583000000	5962310000	-111583000000	503624000000000
-25.75	443560000000	-448232000000	187169000000	157745000000	-55063000000	367359000000	-45564700000	-344162000000	64344300000	171901000000	501971000000000
-25.5	647620000000	191450000000	154285000000	-29092300000	117610000000	479632000000	193088000000	1071580000000	-38863600000	92525400000	502418000000000
-25.25	194153000000	-38179600000	121402000000	146755000000	153963000000	-1771940000000	40350400000	-344162000000	-21562800000	69846600000	501575000000000
-25	307519000000	142243000000	121402000000	-40082700000	-100503000000	-4303490000000	193088000000	-849783000000	67783000000	194580000000	501299000000000
-24.75	12765700000	-152994000000	143324000000	-95034900000	-18710700000	3904860000000	135812000000	-1405970000000	33441600000	58507300000	495377000000000
-24.5	-123275000000	27428700000	165246000000	168735000000	-534593000	3218410000000	78534900000	515393000000	23033600000	81186000000	496668000000000
-24.25	-236641000000	-349819000000	66596000000	80812000000	-534593000	233372000000	-16926300000	262583000000	26533500000	1810490000	501265000000000
-24	-236641000000	93037000000	-174550000000	-292863000000	-64151100000	-1776130000000	-7380190000	-900345000000	-25016900000	-88904400000	500869000000000
-23.75	-576742000000	191450000000	-174550000000	-138997000000	-64151100000	-1974570000000	2165930000	-192476000000	33456900000	103865000000	500439000000000
-23.5	-168621000000	175047000000	-64938000000	-40082700000	53993900000	-3086700000000	-83749200000	9772500000	67767700000	24489200000	505621000000000
-23.25	-372681000000	453883000000	-152627000000	-237910000000	26729600000	1497300000000	59442700000	313145000000	43773100000	24489200000	498390000000000
-23	-350008000000	404677000000	-21093300000	-73054000000	99434200000	-2181420000000	-112388000000	-141914000000	50635200000	-43547000000	497322000000000
-22.75	-281988000000	355470000000	110441000000	157745000000	17641600000	-31757000000	-121934000000	-243038000000	71252400000	-32207600000	499733000000000
-22.5	466233000000	-251407000000	165246000000	-215930000000	-64151100000	-867074000000	135812000000	1324390000000	5839970000	-20868200000	494275000000000
-22.25	-281988000000	453883000000	66596000000	36850300000	8553480000	3688980000000	-36018600000	464831000000	47181200000	13149800000	497942000000000
-22	-213968000000	11026600000	-21093300000	102793000000	-100503000000	1006600000000	-55110800000	-293600000000	-7884380000	-32207600000	498459000000000
-21.75	58112400000	-38179600000	-32054500000	25859800000	8553480000	-3424730000000	-131480000000	717642000000	-31955500000	-54886300000	500404000000000
-21.5	-191295000000	519491000000	154285000000	476467000000	-534593000	-2182530000000	-64656900000	515393000000	60997300000	24489200000	504140000000000
-21.25	12765700000	503089000000	-32054500000	-95034900000	17641600000	-1309960000000	30804300000	-596972000000	-52542000000	-43547000000	501936000000000
-21	330193000000	-38179600000	11790200000	-40082700000	44905800000	-1758040000000	-36018600000	-799221000000	-14670100000	-66225700000	504519000000000
-20.75	126132000000	125841000000	-163588000000	-237910000000	26729600000	-1966520000000	49896500000	110897000000	-90414000000	115204000000	505397000000000
-20.5	103459000000	240656000000	-10132200000	-7111450000	99434200000	1102980000000	30804300000	-40789600000	23201800000	13149800000	495360000000000
-20.25	-259315000000	-87385900000	-229355000000	-325834000000	-36886900000	2346240000000	135812000000	-849783000000	36849700000	103865000000	497873000000000
-20	-145948000000	-317015000000	22751300000	-117016000000	26729600000	-862322000000	68988800000	9772500000	-83551800000	24489200000	499078000000000
-19.75	-191295000000	-70983800000	110441000000	-171968000000	63081900000	-2043050000000	-16926300000	414269000000	19732500000	-20868200000	498235000000000
-19.5	35439000000	-87385900000	143324000000	102793000000	99434200000	-1044460000000	-64656900000	-596972000000	67813600000	81186000000	501196000000000
-19.25	-508722000000	93037000000	-163588000000	47840700000	8553480000	-905468000000	145358000000	9772500000	33426300000	-32207600000	500611000000000
-19	171479000000	-645057000000	-21093300000	-215930000000	-64151100000	-1020870000000	-7380190000	970452000000	9370450000	-9528870000	498235000000000
-18.75	80785800000	-366221000000	-152627000000	58831100000	-145944000000	-739681000000	-74203000000	616517000000	-35333100000	-134262000000	501540000000000
-18.5	12765700000	175047000000	110441000000	157745000000	90346200000	-1539380000000	11712000000	-293600000000	-52557300000	24489200000	499285000000000
-18.25	-32581100000	43830800000	-86860300000	-128006000000	81258100000	466379000000	-150572000000	-394724000000	-991619000	24489200000	499251000000000
-18	239499000000	43830800000	154285000000	58831100000	44905800000	823855000000	212181000000	-596972000000	-128286000000	137883000000	502074000000000
-17.75	-327335000000	27428700000	33712500000	-193949000000	-36886900000	-1143310000000	231273000000	262583000000	-25062700000	-100244000000	502143000000000
-17.5	103459000000	322666000000	154285000000	-160977000000	-109592000000	-1248150000000	21258200000	818766000000	-42256400000	103865000000	501282000000000
-17.25	126132000000	-5375470000	-185511000000	36850300000	63081900000	-1710210000000	-121934000000	717642000000	23140700000	24489200000	498373000000000
-17	-440702000000	142243000000	55634800000	58831100000	-36886900000	2102910000000	-74203000000	768204000000	-56133700000	24489200000	499147000000000
-16.75	-77927800000	535893000000	55634800000	102793000000	44905800000	-1094400000000	78534900000	60334600000	61073800000	-54886300000	502918000000000
-16.5	-327335000000	-5375470000	154285000000	212697000000	-55063000000	3782720000	2165930000	313145000000	-42332900000	1810490000	500387000000000
-16.25	35439000000	207852000000	-53976800000	-73054000000	-64151100000	-2133130000000	-45564700000	414269000000	-18124100000	-77565000000	506464000000000
-16	126132000000	371872000000	77557100000	-270882000000	-127768000000	1191460000000	-45564700000	-900345000000	-45710400000	13149800000	499268000000000
-15.75	-259315000000	-152994000000	-10132200000	-303853000000	17641600000	-1870150000000	126266000000	9772500000	36910900000	24489200000	502298000000000
-15.5	80785800000	-38179600000	-43015700000	3878980000	-27798800000	-1039170000000	-16926300000	363707000000	71313500000	-66225700000	501954000000000
-15.25	-9907690000	-202201000000	-174550000000	168735000000	8553480000	-1839880000000	-179210000000	-40789600000	-14716000000	81186000000	495325000000000
-15	194153000000	125841000000	-64938000000	135764000000	53993900000	452264000000	-83749200000	-748659000000	-93791500000	115204000000	503675000000000
-14.75	-145948000000	125841000000	11790200000	3878980000	-82327300000	-875818000000	-16926300000	262583000000	-73250900000	-88904400000	495136000000000
-14.5	194153000000	-120190000000	-10132200000	91802400000	-9622670000	983548000000	-150572000000	717642000000	85007300000	-66225700000	497374000000000
-14.25	126132000000	-21777600000	110441000000	58831100000	-9622670000	1888610000000	135812000000	464831000000	-69827400000	47167900000	496444000000000
-14	307519000000	-70983800000	121402000000	-149987000000	-73239200000	-344102000000	173996000000	-799221000000	-31955500000	-9528870000	502849000000000
-13.75	-418028000000	93037000000	-75899100000	-204939000000	26729600000	-93363400000	-64656900000	161459000000	-83551800000	160562000000	499888000000000
-13.5	239499000000	-38179600000	-75899100000	69821600000	-91415400000	656116000000	49896500000	-91351600000	-4353890000	35828600000	501816000000000
-13.25	-418028000000	-21777600000	154285000000	-248901000000	17641600000	2386250000000	49896500000	-293600000000	2477700000	13149800000	501282000000000
-13	216826000000	93037000000	-119744000000	-7111450000	-109592000000	2259750000000	-150572000000	-950907000000	-90429300000	13149800000	501437000000000
-12.75	-372681000000	191450000000	66596000000	-51073200000	-27798800000	-2201560000000	126266000000	768204000000	26625300000	24489200000	505535000000000
-12.5	-259315000000	-251407000000	-53976800000	-292863000000	-534593000	-83396300000	-93295300000	9772500000	-7807920000	-88904400000	496031000000000
-12.25	239499000000	-185798000000	77557100000	-149987000000	-534593000	-2055770000000	88081000000	515393000000	-31924900000	-9528870000	497891000000000
-12	171479000000	-70983800000	220052000000	-237910000000	44905800000	-825072000000	-217395000000	-546410000000	23033600000	-100244000000	498287000000000
-11.75	466233000000	-5375470000	-53976800000	-18101900000	17641600000	630700000000	-55110800000	-192476000000	-42164700000	-77565000000	502401000000000
-11.5	171479000000	-349819000000	-152627000000	-106025000000	-45975000000	-2814690000000	-16926300000	60334600000	29972300000	-122922000000	502642000000000
-11.25	58112400000	-251407000000	439275000000	-62063600000	81258100000	-1937160000000	-93295300000	-243038000000	-18292300000	13149800000	497873000000000
-11	-55254400000	-169396000000	263897000000	58831100000	-27798800000	126878000000	2165930000	-1001470000000	36895600000	69846600000	496255000000000
-10.75	-304661000000	339068000000	44673600000	-7111450000	135787000000	-1360580000000	364919000000	-293600000000	71160600000	-213637000000	502608000000000
-10.5	126132000000	-87385900000	-141666000000	-7111450000	-9622670000	992739000000	-74203000000	60334600000	2508280000	-100244000000	496789000000000
-10.25	-236641000000	224254000000	88518300000	-270882000000	-9622670000	1123310000000	-74203000000	-344162000000	67813600000	13149800000	500387000000000
-10	80785800000	-103788000000	-174550000000	-84044500000	-9622670000	998958000000	-45564700000	60334600000	71313500000	-9528870000	499371000000000
-9.75	-213968000000	-169396000000	-141666000000	168735000000	-45975000000	-447224000000	135812000000	515393000000	-32001400000	-54886300000	500542000000000
-9.5	216826000000	-136592000000	-75899100000	113783000000	-27798800000	356294000000	-179210000000	717642000000	-4399770000	13149800000	505776000000000
-9.25	-281988000000	273460000000	-64938000000	-226920000000	-534593000	925400000000	78534900000	212021000000	53966900000	-88904400000	495911000000000
-9	58112400000	-21777600000	11790200000	91802400000	-45975000000	2821490000000	-255579000000	-192476000000	129680000000	-20868200000	494533000000000
-8.75	352866000000	-5375470000	-64938000000	80812000000	35817700000	1429510000000	-255579000000	818766000000	43727200000	13149800000	497236000000000
-8.5	80785800000	-103788000000	-152627000000	-73054000000	-73239200000	993876000000	-64656900000	-91351600000	54058700000	1810490000	498114000000000
-8.25	194153000000	-185798000000	-32054500000	113783000000	-136856000000	-628992000000	259911000000	-243038000000	33380400000	-20868200000	500387000000000
-8	-486048000000	-87385900000	-130705000000	-40082700000	-55063000000	-216051000000	11712000000	-394724000000	-1037490000	-32207600000	503021000000000
-7.75	-191295000000	289862000000	-108783000000	-40082700000	117610000000	-1650030000000	-121934000000	464831000000	5824680000	-88904400000	501713000000000
-7.5	262173000000	-448232000000	77557100000	-29092300000	-91415400000	-306406000000	-112388000000	212021000000	81553300000	-20868200000	502332000000000
-7.25	239499000000	-185798000000	-163588000000	58831100000	35817700000	2326800000000	21258200000	-1254280000000	36880300000	24489200000	500266000000000
-7	12765700000	11026600000	-185511000000	168735000000	44905800000	486384000000	88081000000	515393000000	-66312200000	-32207600000	500955000000000
-6.75	-191295000000	-349819000000	-86860300000	-106025000000	-534593000	-1493640000000	-16926300000	212021000000	2416530000	-43547000000	503727000000000
-6.5	-168621000000	60232900000	-163588000000	-248901000000	8553480000	70674600000	-102841000000	1476070000000	-52603200000	-9528870000	500989000000000
-6.25	12765700000	-333417000000	-21093300000	113783000000	17641600000	-1087520000000	-102841000000	-394724000000	-11261900000	92525400000	498407000000000
-6	12765700000	109439000000	-21093300000	-117016000000	53993900000	-3051520000000	2165930000	110897000000	2370660000	-100244000000	501678000000000
-5.75	194153000000	-120190000000	33712500000	-117016000000	117610000000	2457500000000	-74203000000	-40789600000	67890100000	103865000000	500817000000000
-5.5	-9907690000	-87385900000	220052000000	-237910000000	90346200000	-424568000000	49896500000	-799221000000	-1022200000	1810490000	495756000000000
-5.25	126132000000	-366221000000	-53976800000	-84044500000	-45975000000	-1814720000000	-55110800000	-40789600000	-31986100000	-77565000000	500835000000000
-5	-236641000000	-251407000000	828995000	388544000000	17641600000	-1134980000000	107173000000	-799221000000	-117954000000	-54886300000	502281000000000
-4.75	12765700000	-382623000000	99479400000	267649000000	-73239200000	301691000000	49896500000	-293600000000	9339870000	-156941000000	498373000000000
-4.5	12765700000	93037000000	-10132200000	80812000000	-45975000000	1529100000000	-64656900000	-495848000000	-80006000000	13149800000	498614000000000
-4.25	148806000000	453883000000	-86860300000	-106025000000	-55063000000	1330290000000	-26472400000	-748659000000	-76674300000	-54886300000	500456000000000
-4	-372681000000	-333417000000	-229355000000	-84044500000	90346200000	-553357000000	-16926300000	919890000000	-11338400000	47167900000	500129000000000
-3.75	-168621000000	-185798000000	-97821500000	3878980000	-127768000000	-1363750000000	-246033000000	-1001470000000	33365100000	1810490000	499406000000000
-3.5	-145948000000	-21777600000	66596000000	-128006000000	-27798800000	-327508000000	-74203000000	-344162000000	-11353700000	35828600000	500576000000000
-3.25	-191295000000	-349819000000	22751300000	-128006000000	-100503000000	790801000000	-141026000000	414269000000	-76704900000	35828600000	496703000000000
-3	-213968000000	27428700000	187169000000	-51073200000	-155032000000	640259000000	2165930000	-141914000000	-7884380000	-9528870000	499543000000000
-2.75	420886000000	-481036000000	-119744000000	47840700000	-64151100000	1667760000000	-169664000000	110897000000	47089500000	-100244000000	501575000000000
-2.5	171479000000	-579448000000	-306084000000	36850300000	-55063000000	-788803000000	-93295300000	-344162000000	-1083370000	-32207600000	501265000000000
-2.25	-32581100000	-382623000000	-152627000000	25859800000	-45975000000	882168000000	116719000000	768204000000	19625500000	-32207600000	501764000000000
-2	307519000000	-267809000000	198130000000	454487000000	-82327300000	218088000000	-74203000000	-394724000000	12717400000	-43547000000	496221000000000
-1.75	-77927800000	-284211000000	-10132200000	3878980000	-9622670000	-677667000000	-217395000000	-40789600000	30048700000	58507300000	500387000000000
-1.5	-395355000000	-136592000000	828995000	-40082700000	-91415400000	648391000000	-64656900000	-40789600000	-18108800000	-66225700000	500180000000000
-1.25	80785800000	175047000000	-174550000000	-171968000000	63081900000	-1840380000000	-112388000000	-495848000000	-52603200000	-134262000000	500645000000000
-1	511580000000	93037000000	132363000000	212697000000	-82327300000	-2119700000000	2165930000	-243038000000	78053400000	-111583000000	500989000000000
-0.75	-372681000000	93037000000	-43015700000	-62063600000	72170000000	-1349840000000	68988800000	-698097000000	-66373400000	-111583000000	495480000000000
-0.5	1146430000000	1241180000000	592732000000	2498710000000	208491000000	12804300000000	269457000000	818766000000	119486000000	1810490000	487871000000000
-0.25	443560000000	1716840000000	274858000000	2696530000000	462957000000	8974650000000	737217000000	1526630000000	74752300000	81186000000	478178000000000
0	1055740000000	1339600000000	559848000000	2399790000000	517486000000	5494440000000	1033150000000	4863730000000	133410000000	103865000000	480089000000000
0.25	738313000000	1749650000000	241975000000	3301010000000	526574000000	3640930000000	1233620000000	7189590000000	181552000000	137883000000	482706000000000
0.5	806333000000	1077160000000	154285000000	3114170000000	462957000000	8126270000000	1625010000000	8858140000000	250464000000	103865000000	482792000000000
0.75	375539000000	765523000000	395431000000	3114170000000	499310000000	7273410000000	1959120000000	9060380000000	23293600000	81186000000	484651000000000
1	965047000000	1044360000000	395431000000	2608610000000	508398000000	3896380000000	1806380000000	10021100000000	188475000000	92525400000	483274000000000
1.25	420886000000	1339600000000	603693000000	3191100000000	553838000000	3504450000000	2045040000000	9818820000000	181659000000	171901000000	486717000000000
1.5	851680000000	945945000000	362547000000	2839410000000	753776000000	-246203000000	1930480000000	11487400000000	267933000000	35828600000	485065000000000
1.75	874353000000	1142770000000	252936000000	2795450000000	726511000000	2377740000000	2379150000000	11386200000000	295473000000	160562000000	481036000000000
2	579600000000	1126370000000	592732000000	2278900000000	671983000000	5232610000000	2732360000000	12599700000000	326575000000	149222000000	478712000000000
2.25	1078410000000	814729000000	187169000000	3125160000000	881009000000	3390350000000	2827820000000	11790700000000	398681000000	160562000000	483894000000000
2.5	556926000000	1044360000000	296780000000	2850400000000	790128000000	3745110000000	2331420000000	13257000000000	374855000000	35828600000	483791000000000
2.75	919700000000	1356000000000	384470000000	2916340000000	662895000000	-487296000000	2713260000000	11537900000000	574424000000	205919000000	480847000000000
3	1237130000000	1487210000000	99479400000	2696530000000	662895000000	1178990000000	3133290000000	13560400000000	450476000000	194580000000	485960000000000
3.25	1395840000000	1700440000000	373508000000	2289890000000	1008240000000	4158380000000	2923280000000	12397500000000	516057000000	262616000000	482878000000000
3.5	1055740000000	1224780000000	187169000000	2872380000000	662895000000	-549067000000	3142840000000	12498600000000	595163000000	296634000000	482775000000000
3.75	1259800000000	1060760000000	450237000000	2300880000000	853745000000	323625000000	3448320000000	14925600000000	547021000000	353331000000	484393000000000
4	1237130000000	1323190000000	362547000000	2674550000000	835568000000	1436520000000	3343310000000	12903100000000	653943000000	534760000000	482809000000000
4.25	919700000000	1175570000000	505042000000	2498710000000	1026420000000	686182000000	3343310000000	12296400000000	557826000000	273955000000	488473000000000
4.5	829007000000	814729000000	516004000000	2245930000000	762864000000	1707670000000	3496050000000	11234600000000	660805000000	239937000000	480554000000000
4.75	1191780000000	1536420000000	461198000000	2399790000000	735600000000	-1014230000000	3295580000000	14521100000000	726707000000	387349000000	486080000000000
5	715640000000	732718000000	373508000000	2465740000000	899185000000	1242560000000	3658330000000	15684000000000	671396000000	251276000000	478264000000000
5.25	919700000000	1273990000000	329664000000	1982160000000	835568000000	-3479080000000	3667880000000	14268300000000	791981000000	296634000000	480037000000000
5.5	738313000000	880337000000	395431000000	2147010000000	790128000000	-815051000000	4011540000000	14521100000000	667866000000	489403000000	481966000000000
5.75	942374000000	1273990000000	461198000000	1949180000000	835568000000	55241500000	3887440000000	12195200000000	743701000000	364670000000	483980000000000
6	1169110000000	749120000000	143324000000	2147010000000	999154000000	1415180000000	3916080000000	12549200000000	919276000000	341991000000	480278000000000
6.25	511580000000	962348000000	307742000000	2179980000000	971890000000	-2188610000000	3620150000000	13307600000000	981249000000	58507300000	484772000000000
6.5	1282470000000	847533000000	307742000000	2168990000000	717423000000	1466900000000	3973350000000	13914300000000	1084850000000	319313000000	479659000000000
6.75	1305150000000	1175570000000	461198000000	2520690000000	1162740000000	-1153860000000	4307470000000	11891900000000	1054180000000	296634000000	480020000000000
7	466233000000	1208380000000	340625000000	2245930000000	1135470000000	-2090520000000	3868350000000	11184000000000	905628000000	432706000000	480227000000000
7.25	1169110000000	814729000000	143324000000	2894360000000	944625000000	-2229310000000	3992440000000	13813200000000	1009060000000	330652000000	480313000000000
7.5	534253000000	1257590000000	548887000000	2443750000000	1026420000000	904721000000	4488840000000	11993000000000	1054120000000	251276000000	479418000000000
7.75	829007000000	437481000000	395431000000	2399790000000	1289970000000	-1320790000000	3734700000000	13004200000000	1081490000000	364670000000	477765000000000
8	715640000000	945945000000	537926000000	2158000000000	1044590000000	-337899000000	3944710000000	13257000000000	1088630000000	489403000000	483550000000000
8.25	919700000000	1438010000000	395431000000	2289890000000	1099120000000	-1681120000000	4202460000000	12448000000000	1064560000000	387349000000	481931000000000
8.5	692967000000	1667640000000	570809000000	2037110000000	926449000000	-549028000000	5013880000000	13155900000000	1398510000000	319313000000	484049000000000
8.75	1509210000000	617904000000	559848000000	2432760000000	1017330000000	1586700000000	4431570000000	13560400000000	1343390000000	398688000000	475372000000000
9	851680000000	814729000000	395431000000	2136020000000	1244530000000	-1401960000000	4622490000000	14470500000000	1226520000000	568778000000	483360000000000
9.25	1078410000000	1241180000000	461198000000	2201960000000	1144560000000	1468690000000	4364740000000	12498600000000	1319420000000	591457000000	480761000000000
9.5	1123760000000	1306790000000	450237000000	2114040000000	1062770000000	-654142000000	4775230000000	13155900000000	1288640000000	602797000000	481139000000000
9.75	1146430000000	945945000000	165246000000	2872380000000	1208180000000	1029850000000	4488840000000	12700900000000	1440010000000	341991000000	477162000000000
10	806333000000	765523000000	406392000000	2147010000000	1017330000000	1648840000000	4765680000000	10981700000000	1378110000000	410027000000	478040000000000
10.25	965047000000	1142770000000	307742000000	2267910000000	881009000000	-177790000000	4803870000000	12498600000000	1398650000000	455385000000	470982000000000
10.5	1441190000000	1421610000000	373508000000	2015130000000	1244530000000	-1463960000000	5147530000000	12296400000000	1519450000000	376009000000	477644000000000
10.75	1214450000000	896739000000	516004000000	2212960000000	1362680000000	4356750000000	4765680000000	12448000000000	1663880000000	421367000000	473891000000000
11	1169110000000	1208380000000	450237000000	2366820000000	1180920000000	-872383000000	4870690000000	12498600000000	1739910000000	387349000000	478505000000000
11.25	1078410000000	699914000000	516004000000	1982160000000	1371760000000	2663370000000	4765680000000	12599700000000	1663950000000	625475000000	478953000000000
11.5	806333000000	1257590000000	439275000000	2421770000000	1180920000000	-1567990000000	4994790000000	14824500000000	1657430000000	580118000000	481656000000000
11.75	488906000000	1241180000000	494081000000	2718510000000	1180920000000	-718469000000	4775230000000	14672800000000	1533510000000	534760000000	478367000000000
12	1033070000000	863935000000	526965000000	2509700000000	1253620000000	2308530000000	5300260000000	13105300000000	1667740000000	727530000000	476508000000000
12.25	738313000000	1520020000000	581771000000	2355830000000	1235440000000	-1814370000000	5242990000000	13408700000000	1654170000000	523421000000	476680000000000
12.5	692967000000	1208380000000	537926000000	2333850000000	1244530000000	-322929000000	4880230000000	13611000000000	1595710000000	784226000000	478402000000000
12.75	965047000000	1372400000000	395431000000	2652570000000	1417210000000	1835570000000	5013880000000	13509800000000	1795160000000	557439000000	475630000000000
13	1350490000000	1109970000000	406392000000	2168990000000	1126390000000	2138150000000	5376630000000	12296400000000	1719970000000	523421000000	475871000000000
13.25	511580000000	1290390000000	570809000000	2707520000000	1271800000000	-2167910000000	5414820000000	13762700000000	1764230000000	466724000000	480657000000000
13.5	919700000000	978750000000	329664000000	2432760000000	1308150000000	-837980000000	5386180000000	13206500000000	1895500000000	693511000000	477834000000000
13.75	783660000000	913141000000	614654000000	2652570000000	1244530000000	-362899000000	5395720000000	13257000000000	1871030000000	716190000000	476267000000000
14	556926000000	896739000000	516004000000	2828420000000	1535350000000	1916530000000	5663020000000	12953700000000	1912380000000	455385000000	477403000000000
14.25	1327820000000	1077160000000	461198000000	2564650000000	1326320000000	-352932000000	5949400000000	14116600000000	1970980000000	738869000000	472411000000000
14.5	874353000000	1257590000000	658499000000	2586630000000	1308150000000	2366520000000	5519820000000	14672800000000	1974860000000	704851000000	472876000000000
14.75	806333000000	1208380000000	274858000000	2553660000000	1371760000000	-2539000000000	5968490000000	12802000000000	1716130000000	648154000000	476939000000000
15	897027000000	1306790000000	658499000000	2762480000000	1289970000000	-1402480000000	5500730000000	13914300000000	2081540000000	534760000000	473667000000000
15.25	738313000000	1454410000000	559848000000	2630590000000	1180920000000	-63932700000	5777570000000	13257000000000	2209000000000	466724000000	473030000000000
15.5	1282470000000	1011550000000	340625000000	2245930000000	1499000000000	-1256860000000	5710750000000	14015500000000	2050640000000	704851000000	474666000000000
15.75	715640000000	1470810000000	428314000000	1993150000000	1326320000000	-3176290000000	5481640000000	13964900000000	2026730000000	761548000000	479779000000000
16	1055740000000	896739000000	548887000000	2278900000000	1253620000000	1660800000000	6226240000000	14015500000000	2195600000000	580118000000	474787000000000
16.25	1395840000000	880337000000	428314000000	2344840000000	1326320000000	1418070000000	5987580000000	13712100000000	2226130000000	693511000000	474563000000000
16.5	1441190000000	453883000000	603693000000	2949310000000	1453560000000	-1673790000000	5529370000000	14622200000000	2098810000000	693511000000	477696000000000
16.75	1078410000000	1503620000000	735227000000	2729510000000	1408120000000	771110000000	6340790000000	11841300000000	1984860000000	602797000000	469570000000000
17	556926000000	1208380000000	384470000000	2597620000000	1698940000000	-1014130000000	5997130000000	14824500000000	2261070000000	704851000000	474890000000000
17.25	1418510000000	1159170000000	779071000000	2817430000000	1671670000000	-1109250000000	6340790000000	12094100000000	2233550000000	772887000000	476267000000000
17.5	1146430000000	1405200000000	548887000000	2410780000000	1499000000000	861747000000	5911220000000	12245800000000	2409120000000	784226000000	472307000000000
17.75	1033070000000	1388800000000	439275000000	2861390000000	1235440000000	-1477330000000	6293060000000	14521100000000	2181430000000	580118000000	470655000000000
18	1033070000000	1569220000000	340625000000	2949310000000	1462650000000	-580859000000	6426710000000	13307600000000	2247210000000	659493000000	475682000000000
18.25	1078410000000	1634830000000	548887000000	2696530000000	1553530000000	-185193000000	6388520000000	13611000000000	2288060000000	512082000000	472669000000000
18.5	692967000000	1273990000000	702343000000	2630590000000	1508090000000	2514620000000	6350340000000	13155900000000	2302320000000	659493000000	476026000000000
18.75	851680000000	1191980000000	669460000000	2531680000000	1362680000000	2692450000000	6312150000000	13964900000000	2278340000000	852263000000	469381000000000
19	692967000000	781925000000	735227000000	2817430000000	1489910000000	-3488550000000	6312150000000	12751400000000	2267810000000	795566000000	478574000000000
19.25	1441190000000	1438010000000	779071000000	3004270000000	1535350000000	-150994000000	6579440000000	12448000000000	2557660000000	920299000000	472497000000000
19.5	1214450000000	1618430000000	833877000000	2740500000000	1389940000000	-2066320000000	6359880000000	14875000000000	2530180000000	682172000000	475768000000000
19.75	1622570000000	1618430000000	537926000000	3059220000000	1508090000000	-3184540000000	6321700000000	11841300000000	2643520000000	908959000000	475320000000000
20	874353000000	1470810000000	658499000000	3191100000000	1335410000000	600320000000	6741730000000	12802000000000	2567820000000	727530000000	469932000000000
20.25	965047000000	1323190000000	461198000000	2597620000000	1689850000000	659197000000	7161760000000	13813200000000	2464380000000	829584000000	473719000000000
20.5	829007000000	1569220000000	537926000000	2520690000000	1190000000000	-862047000000	6970830000000	12700900000000	2485050000000	682172000000	472376000000000
20.75	965047000000	1749650000000	592732000000	2916340000000	1417210000000	-1846690000000	6445800000000	12700900000000	2616300000000	818244000000	473633000000000
21	965047000000	1027960000000	636576000000	3312000000000	1462650000000	-3078580000000	6779910000000	14773900000000	2550630000000	806905000000	477507000000000
21.25	1146430000000	1569220000000	680421000000	3026250000000	1499000000000	-2159150000000	6283510000000	12852500000000	2578690000000	648154000000	472927000000000
21.5	1146430000000	1520020000000	516004000000	3388930000000	1408120000000	-733588000000	7094930000000	11942400000000	2709090000000	750208000000	471550000000000
21.75	1033070000000	1257590000000	603693000000	2344840000000	1608050000000	-868635000000	6904010000000	13964900000000	2657760000000	976995000000	472066000000000
22	965047000000	831131000000	790033000000	2872380000000	1517170000000	839139000000	6694000000000	12144700000000	2616030000000	840923000000	471498000000000
22.25	1169110000000	1356000000000	428314000000	2048100000000	1617140000000	-2804780000000	6751270000000	12549200000000	2947120000000	546100000000	475630000000000
22.5	919700000000	1438010000000	680421000000	2905350000000	1544440000000	519603000000	6665360000000	12043500000000	2874420000000	761548000000	468933000000000
22.75	919700000000	1733250000000	757149000000	2421770000000	1571700000000	37973500000	7429050000000	12650300000000	2698750000000	648154000000	471464000000000
23	1305150000000	1618430000000	516004000000	3213080000000	1517170000000	-2446610000000	6999470000000	13712100000000	2623160000000	886281000000	472635000000000
23.25	556926000000	2061290000000	570809000000	2949310000000	1835260000000	-1223150000000	6799000000000	12448000000000	2636830000000	750208000000	472944000000000
23.5	1169110000000	1421610000000	877722000000	3158130000000	1735290000000	-2310180000000	7209490000000	14015500000000	2802530000000	614136000000	474218000000000
23.75	715640000000	1109970000000	472159000000	2740500000000	1262710000000	1370620000000	6254880000000	11285100000000	2823250000000	840923000000	471567000000000
24	1554550000000	995152000000	658499000000	3377940000000	1807990000000	373005000000	6856280000000	11689600000000	2985470000000	863602000000	471705000000000
24.25	1894650000000	1651240000000	713304000000	3312000000000	1662580000000	1010460000000	7304950000000	14318800000000	2881170000000	806905000000	467091000000000
24.5	1191780000000	1618430000000	735227000000	2883370000000	1935230000000	-987378000000	6598540000000	13257000000000	3013020000000	716190000000	475131000000000
24.75	987720000000	1913670000000	899644000000	2861390000000	1926140000000	-2019630000000	7094930000000	12195200000000	2881050000000	784226000000	468296000000000
25	1282470000000	1602030000000	724266000000	3103180000000	1598970000000	1284450000000	7247670000000	12599700000000	2871730000000	738869000000	471584000000000
25.25	1101090000000	1208380000000	811955000000	2839410000000	1762550000000	-1027430000000	7352680000000	11942400000000	2774760000000	806905000000	470448000000000
25.5	760987000000	1995680000000	526965000000	3070210000000	1608050000000	842393000000	7104480000000	12094100000000	3075070000000	818244000000	470379000000000
25.75	806333000000	1880860000000	757149000000	3268040000000	1744380000000	-2680920000000	6894470000000	11082900000000	2833520000000	795566000000	475096000000000
26	1055740000000	2290920000000	439275000000	2949310000000	1898870000000	1418810000000	6378980000000	12346900000000	3009140000000	829584000000	470018000000000
26.25	1055740000000	1848060000000	800994000000	3136150000000	1780730000000	-2475730000000	7199940000000	11234600000000	3116160000000	818244000000	474063000000000
26.5	1509210000000	1536420000000	735227000000	3070210000000	1635320000000	-309864000000	7018570000000	14167200000000	3323120000000	704851000000	468330000000000
26.75	965047000000	2307320000000	647538000000	3268040000000	1671670000000	-320318000000	7352680000000	13863800000000	3181830000000	1045030000000	470637000000000
27	579600000000	1454410000000	494081000000	3136150000000	1598970000000	1413520000000	6951740000000	11487400000000	3150620000000	954317000000	469260000000000
27.25	1441190000000	1618430000000	735227000000	2916340000000	1544440000000	313069000000	7514960000000	13307600000000	3030110000000	795566000000	469140000000000
27.5	534253000000	1667640000000	559848000000	3817560000000	1962490000000	-1604370000000	7085390000000	12296400000000	3119490000000	840923000000	467986000000000
27.75	965047000000	995152000000	702343000000	2410780000000	1826170000000	199086000000	7438590000000	11537900000000	3144020000000	750208000000	470138000000000
28	1214450000000	1798850000000	724266000000	3553790000000	1917050000000	1129730000000	7304950000000	12195200000000	3206010000000	693511000000	466850000000000
28.25	1373170000000	1946470000000	844838000000	2883370000000	1826170000000	-514406000000	7534060000000	11740200000000	3423500000000	829584000000	469140000000000
28.5	1191780000000	1569220000000	779071000000	3158130000000	1617140000000	3135400000000	7304950000000	14015500000000	3322830000000	1022350000000	471137000000000
28.75	965047000000	1388800000000	932528000000	3949440000000	1798900000000	-2257320000000	7600880000000	10830100000000	3412450000000	716190000000	474924000000000
29	919700000000	2536950000000	1129830000000	3531810000000	1644410000000	-2618290000000	7448140000000	11740200000000	3292280000000	886281000000	472445000000000
29.25	1237130000000	1831660000000	965411000000	3103180000000	1817080000000	-2617190000000	7992270000000	11942400000000	3313070000000	818244000000	472497000000000
29.5	1463860000000	1651240000000	669460000000	3180110000000	1626230000000	-697194000000	7992270000000	12498600000000	3120040000000	988335000000	471481000000000
29.75	1101090000000	2126900000000	592732000000	3290020000000	1935230000000	-1780530000000	7629520000000	11689600000000	3271920000000	806905000000	471911000000000
30	602273000000	2044890000000	987334000000	3026250000000	1844340000000	873094000000	7543600000000	12802000000000	3229740000000	988335000000	470551000000000
30.25	1645250000000	2028480000000	822916000000	3322990000000	1817080000000	-2779400000000	8383660000000	13257000000000	3364360000000	1067710000000	466902000000000
30.5	1214450000000	1880860000000	954450000000	3158130000000	1817080000000	3050750000000	7753620000000	11790700000000	3502100000000	942977000000	463338000000000
30.75	1531880000000	2143300000000	888683000000	3191100000000	1717110000000	-3397010000000	7887260000000	12751400000000	3130020000000	1158430000000	468124000000000
31	874353000000	1618430000000	746188000000	3443880000000	1944310000000	-2567500000000	7648610000000	13712100000000	3712800000000	863602000000	470000000000000
31.25	1055740000000	1667640000000	680421000000	3586760000000	1826170000000	-268145000000	7553150000000	14116600000000	3260840000000	999674000000	470293000000000
31.5	874353000000	1766050000000	746188000000	3586760000000	1880700000000	-362288000000	8440940000000	11942400000000	3105930000000	908959000000	474769000000000
31.75	1078410000000	2225310000000	943489000000	3125160000000	1853430000000	-261597000000	8192740000000	14773900000000	3340090000000	659493000000	469329000000000
32	806333000000	1503620000000	888683000000	3839540000000	1807990000000	-785557000000	7610420000000	14470500000000	3377870000000	693511000000	471395000000000
32.25	1259800000000	1864460000000	680421000000	3553790000000	1735290000000	738456000000	7753620000000	12700900000000	3743790000000	965656000000	470069000000000
32.5	919700000000	1552820000000	790033000000	3542800000000	2107900000000	204984000000	7925450000000	13509800000000	3774880000000	1090390000000	469398000000000
32.75	874353000000	1930070000000	790033000000	3202090000000	1889790000000	-3036070000000	7829990000000	12599700000000	3537210000000	886281000000	469329000000000
33	1033070000000	2225310000000	746188000000	3487850000000	1726200000000	-1104810000000	7486330000000	13054800000000	3516790000000	931638000000	470878000000000
33.25	806333000000	2028480000000	1085980000000	3828550000000	1998840000000	-1624580000000	8011360000000	13307600000000	3657540000000	852263000000	466781000000000
33.5	942374000000	1273990000000	779071000000	3861520000000	1789820000000	2268490000000	7782250000000	13762700000000	3375330000000	1033690000000	464956000000000
33.75	942374000000	2438540000000	811955000000	3224070000000	1717110000000	-2831730000000	8183190000000	14521100000000	3499350000000	976995000000	469019000000000
34	1146430000000	2110490000000	636576000000	3762610000000	1880700000000	-2622070000000	7524510000000	11234600000000	3489250000000	1011010000000	470741000000000
34.25	1441190000000	2110490000000	713304000000	3169120000000	2044280000000	-1721120000000	8192740000000	12043500000000	3368160000000	954317000000	471653000000000
34.5	1010390000000	1749650000000	757149000000	3465860000000	2153340000000	-1018150000000	7906350000000	13054800000000	3722570000000	1101730000000	465541000000000
34.75	897027000000	1618430000000	735227000000	3982410000000	1726200000000	957474000000	8259560000000	13863800000000	3964100000000	1067710000000	469432000000000
35	1259800000000	2323720000000	658499000000	2960300000000	1653500000000	575437000000	7868170000000	14015500000000	3678830000000	1067710000000	466471000000000
35.25	1146430000000	2061290000000	1009260000000	3366950000000	1807990000000	-1420530000000	7744070000000	10830100000000	3764690000000	1022350000000	471292000000000
35.5	1531880000000	2389330000000	844838000000	3257050000000	1898870000000	-853586000000	8040000000000	13054800000000	3819450000000	897620000000	469467000000000
35.75	1327820000000	1487210000000	932528000000	3443880000000	2007930000000	-517778000000	8307290000000	13813200000000	3747320000000	1147090000000	466437000000000
36	919700000000	1995680000000	866761000000	3696660000000	2144250000000	-5385690000000	8269110000000	14369400000000	3774740000000	795566000000	474304000000000
36.25	919700000000	2012080000000	669460000000	3971420000000	2026110000000	-875504000000	8316840000000	12448000000000	3991870000000	931638000000	469708000000000
36.5	1237130000000	1766050000000	888683000000	4037370000000	1971580000000	-1623640000000	7839530000000	12144700000000	3939990000000	954317000000	468606000000000
36.75	1033070000000	1651240000000	844838000000	3839540000000	1807990000000	864311000000	8173650000000	12195200000000	3850930000000	1101730000000	470138000000000
37	1509210000000	1749650000000	1064060000000	4026380000000	1962490000000	515784000000	7849080000000	11841300000000	3926410000000	1067710000000	465955000000000
37.25	2008020000000	2208910000000	855800000000	4323120000000	2126080000000	717118000000	7734520000000	10425600000000	3620290000000	1011010000000	460669000000000
37.5	1055740000000	1651240000000	954450000000	3652700000000	2116990000000	588816000000	8641410000000	9970500000000	3599320000000	1181100000000	466592000000000
37.75	1191780000000	2454940000000	855800000000	3861520000000	1680760000000	-2207460000000	8355020000000	13358200000000	3819740000000	1283160000000	470655000000000
38	1146430000000	2044890000000	844838000000	4081330000000	1898870000000	-2821410000000	8374110000000	13560400000000	3640940000000	1011010000000	469759000000000
38.25	874353000000	2618960000000	932528000000	3828550000000	2116990000000	-410265000000	8183190000000	13054800000000	3902710000000	1249140000000	468950000000000
38.5	1191780000000	2126900000000	822916000000	3597750000000	2089720000000	-2064640000000	7724980000000	14622200000000	3799120000000	1079050000000	466178000000000
38.75	919700000000	1749650000000	603693000000	3553790000000	1798900000000	-3731030000000	7963630000000	11487400000000	3936680000000	1158430000000	472256000000000
39	1146430000000	2028480000000	954450000000	4224200000000	2398720000000	-2272230000000	8641410000000	10122200000000	3964930000000	1192440000000	467607000000000
39.25	692967000000	2553350000000	888683000000	3542800000000	2226040000000	297338000000	8240470000000	11790700000000	4054380000000	852263000000	463820000000000
39.5	1305150000000	2487740000000	822916000000	3619730000000	2244220000000	-342393000000	8355020000000	13712100000000	3750630000000	1158430000000	465782000000000
39.75	1282470000000	2077690000000	570809000000	3224070000000	2271480000000	-4165890000000	8460030000000	11487400000000	3850840000000	965656000000	469863000000000
40	1690590000000	1700440000000	1009260000000	3520820000000	2017020000000	-3022490000000	8526850000000	11285100000000	3967950000000	795566000000	468950000000000
40.25	919700000000	1913670000000	1009260000000	3685670000000	2307840000000	928851000000	8555490000000	12245800000000	3813210000000	1203780000000	465541000000000
40.5	1010390000000	2471340000000	1020220000000	3597750000000	2171520000000	-2890660000000	8469580000000	12296400000000	3778470000000	1215120000000	470827000000000
40.75	1214450000000	1585630000000	1031180000000	4026380000000	2162430000000	320715000000	8230920000000	10728900000000	3878650000000	1124410000000	468227000000000
41	1509210000000	1667640000000	1283280000000	2872380000000	2353280000000	-1574680000000	8545940000000	13459300000000	4167860000000	1090390000000	470655000000000
41.25	1169110000000	2061290000000	1096950000000	3410910000000	2180600000000	838903000000	8412300000000	12448000000000	3978790000000	1158430000000	463854000000000
41.5	1441190000000	1930070000000	833877000000	3949440000000	2098810000000	1828910000000	8326380000000	13155900000000	3960620000000	1101730000000	465903000000000
41.75	1645250000000	2668160000000	746188000000	3784590000000	2189690000000	-2324780000000	8221380000000	13408700000000	3891780000000	1158430000000	470224000000000
42	1554550000000	1848060000000	1195600000000	3597750000000	2126080000000	-2082330000000	8679590000000	12094100000000	3743920000000	1022350000000	468399000000000
42.25	965047000000	1766050000000	669460000000	3355960000000	1953400000000	-665269000000	8335930000000	12195200000000	3950550000000	1022350000000	468658000000000
42.5	1599900000000	2668160000000	1195600000000	4312130000000	2071550000000	-753836000000	8746410000000	11841300000000	3982170000000	1056370000000	469071000000000
42.75	1418510000000	1749650000000	1053100000000	3619730000000	2316920000000	-1798220000000	8297750000000	12599700000000	4150960000000	954317000000	474132000000000
43	1418510000000	2733770000000	833877000000	3399920000000	2017020000000	-1676500000000	8985070000000	11133400000000	3954860000000	1192440000000	467900000000000
43.25	1191780000000	2340120000000	987334000000	3432890000000	2062460000000	528064000000	9061440000000	11942400000000	4037260000000	1022350000000	466024000000000
43.5	851680000000	2717370000000	921567000000	3905480000000	2162430000000	1451310000000	8440940000000	10830100000000	4199080000000	1305840000000	464422000000000
43.75	1055740000000	2733770000000	1217520000000	4037370000000	2017020000000	4422680000000	8631860000000	12448000000000	4126560000000	1226460000000	464526000000000
44	2098720000000	2602560000000	1075020000000	3905480000000	2198780000000	408717000000	8364570000000	11891900000000	3967790000000	1271820000000	463717000000000
44.25	1531880000000	2487740000000	1173670000000	4235190000000	1962490000000	-542504000000	8421850000000	10375000000000	3995650000000	897620000000	468072000000000
44.5	1531880000000	2668160000000	1053100000000	3806570000000	2389630000000	-2244620000000	8803690000000	12195200000000	4081920000000	1147090000000	467125000000000
44.75	1214450000000	1733250000000	1096950000000	3586760000000	2144250000000	-1468670000000	8192740000000	12650300000000	4140430000000	1090390000000	467246000000000
45	738313000000	2274510000000	998295000000	3597750000000	2116990000000	-2264510000000	9013700000000	13054800000000	4119630000000	1067710000000	469243000000000
45.25	897027000000	2684570000000	1151750000000	3729630000000	2116990000000	-2025400000000	8985070000000	11184000000000	4167580000000	965656000000	465989000000000
45.5	806333000000	2028480000000	998295000000	3960430000000	2198780000000	-2129300000000	8574580000000	11386200000000	3922760000000	1237800000000	466953000000000
45.75	1735940000000	2700970000000	1403860000000	4147270000000	2207870000000	538596000000	8631860000000	11537900000000	3868120000000	1305840000000	466265000000000
46	1486530000000	2454940000000	1162710000000	4015390000000	2189690000000	-3543480000000	9615110000000	12144700000000	3757660000000	1237800000000	467848000000000
46.25	1078410000000	2389330000000	921567000000	4070340000000	2189690000000	1380100000000	8794140000000	12397500000000	4088580000000	1351190000000	466161000000000
46.5	1871980000000	2405730000000	965411000000	4147270000000	2425980000000	-1977710000000	8985070000000	10324400000000	4439920000000	1249140000000	469759000000000
46.75	1078410000000	2274510000000	1107910000000	4070340000000	2098810000000	-933080000000	8813240000000	11891900000000	4106410000000	1158430000000	465473000000000
47	1667920000000	2372930000000	921567000000	4114300000000	2107900000000	119185000000	9051890000000	11588500000000	4205950000000	1169760000000	467143000000000
47.25	1531880000000	2586150000000	1305210000000	3795580000000	2326010000000	939139000000	9051890000000	13004200000000	4109520000000	1033690000000	465008000000000
47.5	692967000000	2717370000000	1195600000000	3773600000000	1898870000000	1488550000000	8994610000000	10931200000000	4009510000000	1022350000000	463630000000000
47.75	1101090000000	1995680000000	1217520000000	3949440000000	1998840000000	3216250000000	9070980000000	11082900000000	4233330000000	1067710000000	462219000000000
48	1894650000000	2487740000000	1360010000000	3982410000000	2089720000000	-1033650000000	9366910000000	11740200000000	3916420000000	1135750000000	467866000000000
48.25	1327820000000	2569750000000	1140790000000	3498840000000	2353280000000	-2690100000000	8870510000000	11639000000000	4192040000000	1475930000000	468813000000000
48.5	1395840000000	2864990000000	1283280000000	4081330000000	2035190000000	-174206000000	8679590000000	12599700000000	4544330000000	1147090000000	466316000000000
48.75	829007000000	3045410000000	987334000000	4246180000000	2062460000000	-911405000000	9166440000000	12549200000000	4257420000000	1271820000000	464457000000000
49	1305150000000	2635360000000	1162710000000	4059350000000	2280570000000	843781000000	8393210000000	11285100000000	3978380000000	908959000000	465610000000000
49.25	1962670000000	2520550000000	899644000000	4202220000000	2107900000000	-207464000000	8803690000000	13155900000000	4161350000000	1260480000000	461444000000000
49.5	1509210000000	2881390000000	1075020000000	3960430000000	2253310000000	-342432000000	8860970000000	11082900000000	4278170000000	1294500000000	464509000000000
49.75	1577230000000	2717370000000	1239440000000	4147270000000	2198780000000	-1014650000000	9309630000000	11537900000000	4085310000000	1113070000000	465197000000000
50	1849310000000	3176630000000	1096950000000	3872510000000	2144250000000	-3530380000000	8899150000000	10324400000000	4226390000000	1147090000000	465920000000000
50.25	1509210000000	2553350000000	1261360000000	4114300000000	2107900000000	471422000000	9070980000000	11133400000000	4068010000000	1623340000000	463613000000000
50.5	1191780000000	2438540000000	1107910000000	3465860000000	2271480000000	-986633000000	8813240000000	12043500000000	4174630000000	1634680000000	463717000000000
50.75	1350490000000	2553350000000	1524430000000	4114300000000	2398720000000	-2608610000000	8307290000000	10627800000000	4437240000000	1135750000000	466540000000000
51	1645250000000	2618960000000	1370970000000	3927460000000	2135160000000	480079000000	8574580000000	12903100000000	4282240000000	1407890000000	467074000000000
51.25	1917330000000	2799380000000	1129830000000	3542800000000	2453250000000	-2638740000000	8574580000000	11639000000000	4303160000000	1079050000000	470465000000000
51.5	1327820000000	2487740000000	1338090000000	3861520000000	2198780000000	806085000000	8631860000000	10627800000000	4219380000000	1305840000000	466127000000000
51.75	1146430000000	3209430000000	1228480000000	4301140000000	2344190000000	-869035000000	9042340000000	10678400000000	4305960000000	1305840000000	466196000000000
52	1191780000000	2881390000000	965411000000	3377940000000	2017020000000	-2815880000000	9491010000000	9414320000000	4223660000000	1237800000000	471292000000000
52.25	1622570000000	2897790000000	1381940000000	3729630000000	2189690000000	593780000000	8488670000000	10728900000000	4302660000000	1623340000000	464026000000000
52.5	1713270000000	2454940000000	1140790000000	4619860000000	2262400000000	-985707000000	9386000000000	12650300000000	4305160000000	1419230000000	472411000000000
52.75	1781290000000	3143820000000	1107910000000	3883500000000	2216960000000	-2640740000000	9242810000000	11537900000000	4599310000000	1271820000000	469863000000000
53	1237130000000	2176100000000	965411000000	4345100000000	2416890000000	-2712540000000	8965970000000	12549200000000	4213280000000	1147090000000	466230000000000
53.25	1418510000000	3094620000000	1151750000000	3894490000000	2425980000000	-305841000000	9195080000000	11487400000000	4485310000000	1543960000000	470810000000000
53.5	1214450000000	2897790000000	1140790000000	4059350000000	2135160000000	-2078340000000	9481460000000	9818820000000	4281950000000	1294500000000	462735000000000
53.75	1622570000000	2799380000000	1151750000000	4422030000000	2216960000000	84013500000	9023250000000	11133400000000	4316570000000	1271820000000	464216000000000
54	1350490000000	2438540000000	1206560000000	4213210000000	2480510000000	20823100000	9347820000000	10223300000000	4268410000000	1226460000000	462770000000000
54.25	1350490000000	2602560000000	1009260000000	3575770000000	2262400000000	-137161000000	9357370000000	12346900000000	4075270000000	1339850000000	466024000000000
54.5	1554550000000	2947000000000	987334000000	4575900000000	2844030000000	393669000000	8956430000000	11537900000000	4340650000000	1147090000000	466316000000000
54.75	1395840000000	2897790000000	1064060000000	3905480000000	2371450000000	-449302000000	9691480000000	11032300000000	4605890000000	1430570000000	468640000000000
55	1327820000000	2389330000000	1239440000000	3982410000000	2498690000000	1410190000000	9300090000000	11790700000000	4189490000000	1419230000000	467831000000000
55.25	1554550000000	2126900000000	1228480000000	4092320000000	2380540000000	-544370000000	8937340000000	12802000000000	4467560000000	1124410000000	464422000000000
55.5	1101090000000	2438540000000	1535390000000	4158260000000	2425980000000	-1826880000000	10063800000000	11032300000000	4471950000000	1521280000000	468967000000000
55.75	2302780000000	2700970000000	1118870000000	4509950000000	2480510000000	960736000000	9433730000000	11639000000000	4416640000000	1464590000000	461444000000000
56	1169110000000	2766580000000	1206560000000	4378070000000	2326010000000	-43755400000	8603220000000	12144700000000	4274770000000	1328520000000	466092000000000
56.25	1531880000000	3061810000000	1118870000000	4268170000000	2062460000000	-1098180000000	9090070000000	12346900000000	4519790000000	1305840000000	465593000000000
56.5	1282470000000	3242240000000	1272320000000	4498960000000	2316920000000	386885000000	9863310000000	11588500000000	4213390000000	1555300000000	459636000000000
56.75	1123760000000	2504140000000	1294250000000	4202220000000	2198780000000	1712160000000	10264200000000	11740200000000	4323400000000	1532620000000	469570000000000
57	1418510000000	3357050000000	1184630000000	4158260000000	1853430000000	-3797630000000	9290540000000	11841300000000	4112550000000	1260480000000	466833000000000
57.25	1350490000000	2799380000000	1118870000000	3861520000000	2253310000000	128132000000	9548290000000	11740200000000	4309750000000	1249140000000	465782000000000
57.5	919700000000	2947000000000	1140790000000	4048360000000	2580480000000	-923160000000	9710570000000	10223300000000	4257250000000	1328520000000	467211000000000
57.75	1350490000000	2684570000000	976372000000	4158260000000	2580480000000	-2971490000000	9013700000000	11285100000000	4616090000000	1509950000000	466006000000000
58	1554550000000	2618960000000	1162710000000	4169250000000	2335100000000	-114019000000	9576930000000	9566000000000	4365090000000	1634680000000	462787000000000
58.25	1554550000000	2832190000000	1524430000000	3905480000000	2407810000000	652296000000	10054200000000	11689600000000	4571780000000	1351190000000	463217000000000
58.5	1985350000000	2947000000000	1085980000000	4356090000000	2407810000000	-1119610000000	9214170000000	10425600000000	4643640000000	1509950000000	467384000000000
58.75	1169110000000	2586150000000	1557310000000	4202220000000	2162430000000	-2200540000000	9920590000000	9414320000000	4457970000000	1419230000000	467418000000000
59	1962670000000	2553350000000	1338090000000	4213210000000	2371450000000	-753138000000	9672390000000	11487400000000	4385920000000	1668700000000	463252000000000
59.25	1463860000000	2110490000000	1491550000000	4092320000000	2589570000000	-2335870000000	9414640000000	12599700000000	4444500000000	1362530000000	465886000000000
59.5	1758610000000	2454940000000	1085980000000	4191230000000	2535040000000	-178802000000	9758300000000	10122200000000	4395730000000	1385210000000	466609000000000
59.75	1282470000000	3471870000000	1327130000000	4411040000000	2453250000000	-1372290000000	9576930000000	10577200000000	4643780000000	1441910000000	464147000000000
60	1214450000000	2864990000000	1568280000000	4312130000000	2553210000000	-572468000000	9357370000000	11993000000000	4189130000000	1464590000000	463355000000000

## Sheet: 575K
Time (ms)	m/z 28 Ethene	m/z 30 Formaldehyde	m/z 56 Acrolein	m/z 70 (2,3-DHF & 2,5-DHF)	m/z 86 THF-3-one	m/z 71 ROO	m/z 58 butanedial	m/z 103 OOQOOH	Sum UHP + KHP	m/z 84	m/z 72 THF
-30	-103323000000	415637000000	67560700000	272398000000	34460600000	-513549000000	149850000000	1414040000000	45134200000	-38020200000	503428000000000
-29.75	100845000000	54729000000	-152104000000	-67431700000	-1910230000	-610323000000	-136534000000	554483000000	-88991700000	132070000000	501197000000000
-29.5	191586000000	235183000000	-119154000000	-188016000000	143573000000	-1568220000000	16204300000	-305072000000	-99445500000	336179000000	498056000000000
-29.25	305013000000	-142130000000	-174070000000	-374375000000	116295000000	2093620000000	63934900000	301673000000	76021600000	75373400000	498359000000000
-29	32788900000	54729000000	100510000000	-341488000000	61738800000	-262482000000	44842700000	-659007000000	-16839500000	98052100000	501286000000000
-28.75	599922000000	-273369000000	-20305100000	118927000000	107202000000	-2457250000000	73481100000	99424600000	69174700000	222785000000	504731000000000
-28.5	78159500000	-191345000000	56577500000	-100318000000	16275200000	-5080910000000	-107895000000	402797000000	55496300000	86712800000	503286000000000
-28.25	168901000000	-60105400000	166410000000	118927000000	25367900000	-1756490000000	235765000000	-355634000000	45195400000	75373400000	499805000000000
-28	123530000000	366422000000	-75221300000	-12620400000	16275200000	-1824120000000	-60164600000	-52261600000	89822400000	75373400000	501358000000000
-27.75	32788900000	136754000000	111494000000	86039900000	-11002900000	1388480000000	130758000000	-355634000000	-61634700000	75373400000	501643000000000
-27.5	-35267100000	-421013000000	45594200000	-78393900000	-56466500000	-780882000000	83027200000	-456758000000	-3084530000	18676600000	500198000000000
-27.25	395754000000	530471000000	188376000000	-308601000000	-1910230000	413227000000	44842700000	706169000000	-20201700000	52694700000	497877000000000
-27	146215000000	251588000000	122477000000	272398000000	-56466500000	1955510000000	83027200000	-861255000000	7185790000	30016000000	497359000000000
-26.75	486495000000	5514250000	122477000000	272398000000	125388000000	1332300000000	-136534000000	-507320000000	-16808900000	86712800000	499555000000000
-26.5	123530000000	-371799000000	78543900000	-111281000000	-92837400000	-1227880000000	-50618500000	301673000000	-40925900000	-219450000000	496056000000000
-26.25	-12581800000	596091000000	-9321900000	-56469400000	134480000000	-2127000000000	35296600000	-153386000000	-95991500000	64034000000	503053000000000
-26	599922000000	120349000000	-9321900000	392983000000	70831500000	-286399000000	-12434000000	-709569000000	-44257600000	98052100000	503428000000000
-25.75	-57952400000	169563000000	-75221300000	-1658160000	-120116000000	-1471850000000	207127000000	908418000000	17716100000	347518000000	503375000000000
-25.5	100845000000	-125725000000	-20305100000	-188016000000	-1910230000	-1931380000000	-2887900000	-709569000000	93215300000	64034000000	502536000000000
-25.25	146215000000	-109320000000	-218003000000	140851000000	-11002900000	1341970000000	6658220000	251111000000	76067500000	41355300000	502322000000000
-25	-194064000000	300803000000	78543900000	-89356200000	-47373800000	-1501510000000	-31526300000	-305072000000	17532600000	-49359600000	502107000000000
-24.75	327698000000	87538800000	144443000000	-286677000000	43553300000	-1909910000000	73481100000	-102824000000	103516000000	-94717000000	498288000000000
-24.5	100845000000	-535848000000	-97187700000	-462073000000	16275200000	176505000000	92573300000	605045000000	10655100000	86712800000	500769000000000
-24.25	-194064000000	661711000000	-239970000000	75077600000	-1910230000	-616639000000	-31526300000	756732000000	3792930000	86712800000	500019000000000
-24	100845000000	-503038000000	265259000000	338172000000	-56466500000	-3215210000000	111666000000	-1468000000000	-30456800000	18676600000	502429000000000
-23.75	236957000000	-10890700000	78543900000	64115400000	43553300000	334488000000	130758000000	655607000000	-3099820000	86712800000	499698000000000
-23.5	-194064000000	-60105400000	89527100000	9304100000	107202000000	-216713000000	-69710800000	-760131000000	-40925900000	30016000000	501983000000000
-23.25	-103323000000	-224154000000	111494000000	-100318000000	-74651900000	-1203010000000	-146080000000	-962379000000	-3053950000	41355300000	498770000000000
-23	123530000000	202373000000	12644600000	129889000000	16275200000	1248790000000	25750500000	-1012940000000	31364000000	52694700000	497734000000000
-22.75	-35267100000	-355394000000	89527100000	-198979000000	34460600000	935852000000	254857000000	-608444000000	113787000000	-72038300000	494664000000000
-22.5	-103323000000	71133900000	-9321900000	-242828000000	16275200000	-2246540000000	-12434000000	554483000000	-185383000000	-38020200000	498502000000000
-22.25	-352862000000	21919200000	12644600000	118927000000	-111023000000	-1282830000000	-60164600000	-1366880000000	14170300000	109391000000	500251000000000
-22	350383000000	-322584000000	-119154000000	-133205000000	-11002900000	-1437920000000	121212000000	-1670250000000	-54619600000	-26680800000	505713000000000
-21.75	305013000000	-158535000000	-130137000000	151813000000	-20095700000	-11359700000	-2887900000	1515160000000	-44364600000	98052100000	499430000000000
-21.5	55474200000	481257000000	23627800000	107964000000	-1910230000	1066610000000	226219000000	-760131000000	75975700000	154749000000	499519000000000
-21.25	-239435000000	546876000000	111494000000	140851000000	-11002900000	689445000000	-165172000000	453359000000	72598200000	154749000000	499876000000000
-21	373069000000	-10890700000	254276000000	9304100000	-92837400000	-4450020000000	130758000000	-355634000000	-64905300000	-196771000000	504035000000000
-20.75	-239435000000	120349000000	-64238000000	-220903000000	-11002900000	-1957110000000	-88803000000	99424600000	62220800000	86712800000	500626000000000
-20.5	55474200000	-224154000000	-9321900000	338172000000	-56466500000	334376000000	-136534000000	-456758000000	31409800000	-140074000000	499127000000000
-20.25	-375547000000	-60105400000	-64238000000	86039900000	61738800000	-3484600000000	149850000000	1009540000000	-16870000000	-94717000000	504178000000000
-20	32788900000	-27295600000	-130137000000	107964000000	89016900000	-462572000000	44842700000	-153386000000	-34017800000	109391000000	494504000000000
-19.75	78159500000	71133900000	100510000000	-12620400000	7182480000	-904815000000	54388800000	149987000000	-10007900000	-72038300000	499091000000000
-19.5	-330176000000	235183000000	23627800000	-286677000000	34460600000	-780714000000	-203356000000	149987000000	48557600000	18676600000	501054000000000
-19.25	146215000000	-125725000000	-119154000000	480681000000	79924200000	-2972060000000	92573300000	1565720000000	17517300000	52694700000	501286000000000
-19	236957000000	-355394000000	155426000000	31228600000	152666000000	1134800000000	35296600000	251111000000	-20262900000	41355300000	500822000000000
-18.75	-57952400000	-240559000000	56577500000	42190900000	7182480000	360047000000	121212000000	1363480000000	384783000	-94717000000	500751000000000
-18.5	-511659000000	-470228000000	-130137000000	-89356200000	-120116000000	-356871000000	16204300000	1009540000000	-6400930000	-49359600000	500876000000000
-18.25	-80637700000	-289774000000	23627800000	107964000000	-83744700000	1822680000000	-31526300000	-861255000000	7170500000	-72038300000	502572000000000
-18	-57952400000	333612000000	-207020000000	338172000000	170851000000	-825852000000	159396000000	-1265750000000	-13461900000	-4002130000	498413000000000
-17.75	123530000000	-76510300000	12644600000	-308601000000	16275200000	-715982000000	6658220000	48862500000	41680200000	86712800000	500198000000000
-17.5	-126008000000	464852000000	-141121000000	-198979000000	25367900000	-65508700000	-21980100000	-254510000000	-88991700000	7337230000	502536000000000
-17.25	123530000000	399232000000	78543900000	-34544900000	43553300000	1919880000000	-146080000000	-52261600000	-30579100000	-106056000000	496628000000000
-17	327698000000	-125725000000	67560700000	-330526000000	-29188400000	475110000000	-79256900000	-760131000000	-106292000000	154749000000	498002000000000
-16.75	214271000000	-92915200000	133460000000	-122243000000	-92837400000	2665370000000	-155626000000	-52261600000	38134400000	-15341500000	497431000000000
-16.5	100845000000	21919200000	-119154000000	206625000000	-29188400000	1542030000000	35296600000	-608444000000	-95976200000	-4002130000	498645000000000
-16.25	146215000000	38324100000	-108171000000	338172000000	152666000000	-2765810000000	168942000000	-153386000000	55419800000	-72038300000	503303000000000
-16	-352862000000	267993000000	78543900000	129889000000	79924200000	414476000000	-50618500000	-406196000000	-23716900000	-60698900000	499073000000000
-15.75	168901000000	-10890700000	-163087000000	-188016000000	-20095700000	-30475800000	-50618500000	-1063500000000	41619000000	-38020200000	495039000000000
-15.5	-12581800000	809355000000	12644600000	118927000000	-65559200000	-415567000000	140304000000	-406196000000	-27048600000	7337230000	501483000000000
-15.25	-239435000000	218778000000	100510000000	239511000000	7182480000	-736474000000	63934900000	-456758000000	51996400000	64034000000	499127000000000
-15	-194064000000	317207000000	67560700000	86039900000	-120116000000	2233500000000	130758000000	-1699570000	-10007900000	-117396000000	498038000000000
-14.75	78159500000	267993000000	89527100000	-253790000000	-56466500000	-2228390000000	-174718000000	-456758000000	-120093000000	-4002130000	503125000000000
-14.5	-443603000000	21919200000	-75221300000	140851000000	34460600000	787525000000	16204300000	352235000000	-40849400000	7337230000	503589000000000
-14.25	-57952400000	120349000000	111494000000	-45507200000	-47373800000	-259577000000	-41072400000	503921000000	-47803400000	109391000000	500590000000000
-14	123530000000	-43700500000	67560700000	97002100000	-38281100000	-70687700000	6658220000	402797000000	-37548300000	177428000000	501983000000000
-13.75	441125000000	267993000000	-141121000000	97002100000	16275200000	85316700000	-69710800000	-355634000000	69159400000	-38020200000	496003000000000
-13.5	-262120000000	546876000000	78543900000	-264752000000	-38281100000	642890000000	-98349100000	-1699570000	-27063900000	-72038300000	495182000000000
-13.25	-307491000000	21919200000	12644600000	75077600000	125388000000	1185020000000	197581000000	-1366880000000	-147572000000	-185432000000	498359000000000
-13	-35267100000	-453823000000	-75221300000	-78393900000	-147394000000	911248000000	16204300000	-760131000000	3762350000	120731000000	498466000000000
-12.75	-126008000000	-109320000000	-9321900000	31228600000	52646000000	-1449290000000	-231995000000	48862500000	-37517700000	-162753000000	499466000000000
-12.5	-284806000000	-404608000000	1661330000	20266400000	-20095700000	1427650000000	-184264000000	-1164630000000	41695500000	52694700000	499733000000000
-12.25	214271000000	366422000000	78543900000	-166092000000	-129208000000	-529605000000	54388800000	-1417440000000	-58196000000	30016000000	504285000000000
-12	486495000000	-142130000000	122477000000	-1658160000	-1910230000	-46546700000	-69710800000	554483000000	461242000	109391000000	500983000000000
-11.75	-806568000000	5514250000	67560700000	195662000000	-65559200000	131648000000	-60164600000	807294000000	-13293700000	120731000000	499555000000000
-11.5	123530000000	-158535000000	78543900000	-1658160000	25367900000	1855950000000	-79256900000	-305072000000	-58134800000	-287486000000	496396000000000
-11.25	327698000000	-43700500000	-207020000000	-78393900000	-11002900000	852088000000	54388800000	-52261600000	65812500000	30016000000	501875000000000
-11	-216750000000	202373000000	111494000000	-67431700000	-56466500000	354236000000	-107895000000	48862500000	-44379900000	-83377600000	502143000000000
-10.75	-262120000000	38324100000	232309000000	-352450000000	107202000000	-1541820000000	63934900000	352235000000	-30472100000	120731000000	503393000000000
-10.5	-126008000000	-421013000000	-305869000000	-144167000000	70831500000	-433954000000	54388800000	-659007000000	354200000	-94717000000	500804000000000
-10.25	395754000000	497661000000	-64238000000	-12620400000	43553300000	3083910000000	-79256900000	908418000000	-78660200000	120731000000	501215000000000
-10	-625085000000	21919200000	-130137000000	-286677000000	16275200000	-1564060000000	293042000000	-406196000000	55343300000	-72038300000	498555000000000
-9.75	-216750000000	103944000000	-86204500000	-1658160000	52646000000	-170129000000	63934900000	-254510000000	-51150300000	-83377600000	496503000000000
-9.5	-262120000000	-207750000000	89527100000	-89356200000	-56466500000	3820180000000	83027200000	807294000000	55389200000	-298825000000	501536000000000
-9.25	327698000000	-404608000000	-53254800000	-122243000000	25367900000	-1928830000000	-88803000000	149987000000	58843200000	-60698900000	505213000000000
-9	-534344000000	-27295600000	-31288300000	-122243000000	-1910230000	275272000000	-88803000000	1161230000000	55373900000	30016000000	502821000000000
-8.75	10103500000	-76510300000	-207020000000	-155130000000	-174672000000	30592200000	54388800000	706169000000	-64951100000	-4002130000	501340000000000
-8.5	-126008000000	-92915200000	-64238000000	-407262000000	-20095700000	441003000000	-241541000000	-608444000000	-16900600000	-26680800000	499894000000000
-8.25	-35267100000	-10890700000	-207020000000	-1658160000	-65559200000	1854120000000	130758000000	857856000000	17593700000	132070000000	497431000000000
-8	191586000000	251588000000	100510000000	9304100000	7182480000	-1780630000000	-117441000000	-1366880000000	-78736700000	-38020200000	500804000000000
-7.75	-398232000000	-60105400000	-20305100000	-330526000000	-129208000000	-1877700000000	-107895000000	-254510000000	-40849400000	30016000000	502232000000000
-7.5	-148694000000	-617872000000	122477000000	228549000000	-47373800000	-242566000000	168942000000	48862500000	27986400000	-72038300000	504589000000000
-7.25	-126008000000	-125725000000	-108171000000	-56469400000	107202000000	-2165690000000	54388800000	402797000000	24471200000	-185432000000	497074000000000
-7	-443603000000	-92915200000	155426000000	-34544900000	-83744700000	-3034960000000	-203356000000	-557882000000	69235900000	-106056000000	501108000000000
-6.75	-103323000000	-92915200000	122477000000	-67431700000	89016900000	2239310000000	-88803000000	352235000000	-123425000000	-60698900000	496645000000000
-6.5	418439000000	185968000000	-130137000000	-264752000000	25367900000	2031850000000	-79256900000	-1012940000000	-44303500000	-219450000000	498805000000000
-6.25	-126008000000	-174940000000	89527100000	75077600000	-38281100000	642539000000	-165172000000	-709569000000	-30487400000	120731000000	498555000000000
-6	146215000000	-256964000000	89527100000	-122243000000	70831500000	-631040000000	-174718000000	807294000000	3899970000	-94717000000	498984000000000
-5.75	191586000000	-191345000000	34611000000	-89356200000	-147394000000	871962000000	-203356000000	-557882000000	-3099820000	-49359600000	499805000000000
-5.5	-103323000000	71133900000	-119154000000	-473035000000	61738800000	38564400000	-21980100000	1312910000000	3792930000	-117396000000	500626000000000
-5.25	-330176000000	21919200000	-228986000000	118927000000	-156486000000	-116162000000	-41072400000	-760131000000	-3038660000	-94717000000	497627000000000
-5	-12581800000	169563000000	133460000000	-23582700000	34460600000	2213770000000	35296600000	-456758000000	31348700000	98052100000	490505000000000
-4.75	-330176000000	-240559000000	67560700000	-209941000000	-47373800000	-2118110000000	-107895000000	-1114070000000	51981100000	-106056000000	501822000000000
-4.5	123530000000	71133900000	-261936000000	97002100000	16275200000	639746000000	-146080000000	908418000000	-27186200000	-94717000000	499823000000000
-4.25	-103323000000	366422000000	-185054000000	371058000000	125388000000	1391330000000	-60164600000	352235000000	38180300000	41355300000	500662000000000
-4	191586000000	-207750000000	-174070000000	305285000000	-20095700000	-2756190000000	44842700000	1666850000000	65766600000	-174093000000	505784000000000
-3.75	-511659000000	-847541000000	-75221300000	-177054000000	79924200000	-435666000000	-50618500000	958980000000	384783000	52694700000	502411000000000
-3.5	32788900000	136754000000	-20305100000	9304100000	43553300000	-999092000000	-31526300000	2526400000000	52042200000	-26680800000	499252000000000
-3.25	-171379000000	-355394000000	12644600000	-34544900000	-120116000000	554929000000	-69710800000	-608444000000	-92613900000	52694700000	496521000000000
-3	-57952400000	169563000000	100510000000	-177054000000	7182480000	2625340000000	-117441000000	1767970000000	-61512400000	-128735000000	500144000000000
-2.75	191586000000	-437418000000	12644600000	-188016000000	-129208000000	-1044520000000	140304000000	-810693000000	-44395200000	98052100000	500269000000000
-2.5	282327000000	-273369000000	-53254800000	294323000000	-47373800000	3164880000000	-98349100000	-659007000000	-71889800000	-38020200000	495271000000000
-2.25	-148694000000	38324100000	-174070000000	42190900000	-74651900000	-1983860000000	-146080000000	-355634000000	79460300000	-94717000000	498662000000000
-2	191586000000	-289774000000	-75221300000	-231865000000	79924200000	2758850000000	-174718000000	-254510000000	17563200000	-60698900000	498359000000000
-1.75	-171379000000	-240559000000	419024000000	184700000000	-101930000000	-1527910000000	-146080000000	-1063500000000	113878000000	-49359600000	496770000000000
-1.5	55474200000	-109320000000	67560700000	-209941000000	-29188400000	939824000000	92573300000	-1699570000	41573100000	109391000000	499394000000000
-1.25	-148694000000	-191345000000	-196037000000	294323000000	-83744700000	-210775000000	168942000000	402797000000	93184700000	-72038300000	496074000000000
-1	236957000000	-453823000000	-42271600000	-209941000000	-29188400000	740577000000	-2887900000	301673000000	69144100000	-83377600000	496895000000000
-0.75	-466288000000	-92915200000	-108171000000	-352450000000	-1910230000	-1184790000000	-41072400000	857856000000	93200000000	-174093000000	498591000000000
-0.5	690663000000	1350720000000	440990000000	2881410000000	252686000000	12930800000000	646248000000	4346640000000	179337000000	-4002130000	482187000000000
-0.25	667978000000	530471000000	408041000000	3396640000000	443633000000	11395400000000	1314480000000	6369120000000	186138000000	98052100000	476565000000000
0	917516000000	1383530000000	320175000000	3933790000000	625487000000	4805180000000	2039980000000	7127550000000	244825000000	-26680800000	482634000000000
0.25	1030940000000	1695220000000	78543900000	3681660000000	716414000000	4193980000000	1982710000000	10211800000000	307181000000	154749000000	484044000000000
0.5	1121680000000	1563980000000	550823000000	3583000000000	543653000000	3045780000000	2565020000000	8644420000000	348477000000	392875000000	477457000000000
0.75	985572000000	1170260000000	287225000000	2892380000000	761878000000	4049560000000	3510080000000	11475900000000	437960000000	268143000000	476779000000000
1	1507330000000	1219480000000	386074000000	3550110000000	661858000000	1212280000000	3720100000000	13346700000000	527520000000	256803000000	482259000000000
1.25	1257800000000	1006210000000	473940000000	3780320000000	743692000000	2423360000000	3815560000000	12183800000000	651834000000	245464000000	478564000000000
1.5	1666130000000	1039020000000	122477000000	3703580000000	1007380000000	-621032000000	4770170000000	11324200000000	834378000000	438233000000	482830000000000
1.75	1076310000000	1711620000000	408041000000	3692620000000	1043750000000	380259000000	4626980000000	11223100000000	837908000000	631002000000	479760000000000
2	917516000000	1170260000000	199359000000	3089700000000	1161960000000	-1238140000000	4617430000000	10565800000000	858587000000	426894000000	479974000000000
2.25	1620760000000	1367120000000	375091000000	3352790000000	861898000000	-1069930000000	5438400000000	11475900000000	1064910000000	585645000000	484526000000000
2.5	1461960000000	727330000000	440990000000	2958150000000	1116490000000	1081750000000	4961100000000	14105100000000	1023950000000	392875000000	478546000000000
2.75	1530020000000	1350720000000	638688000000	3714550000000	1234700000000	-1325530000000	5228390000000	10717500000000	1086250000000	665020000000	479082000000000
3	1030940000000	1071830000000	528856000000	3056810000000	1334720000000	-483919000000	5734330000000	12183800000000	1382410000000	336179000000	473602000000000
3.25	1189740000000	825760000000	440990000000	3824170000000	1289260000000	-1672980000000	5667510000000	10363500000000	1162200000000	631002000000	480991000000000
3.5	622607000000	1219480000000	177393000000	3177400000000	1043750000000	1279580000000	5342940000000	11172500000000	1496420000000	631002000000	478992000000000
3.75	463810000000	1596790000000	572789000000	3144510000000	1316530000000	-1023290000000	5982530000000	10414100000000	1451550000000	699038000000	479331000000000
4	1393910000000	1449150000000	495906000000	2738910000000	1389270000000	-1833910000000	6536210000000	10919700000000	1345020000000	857789000000	477386000000000
4.25	1030940000000	809355000000	364108000000	3199320000000	916454000000	3605530000000	6211640000000	10161300000000	1420430000000	596984000000	472227000000000
4.5	554551000000	825760000000	462957000000	3034890000000	1316530000000	516894000000	6641210000000	10313000000000	1623580000000	699038000000	478421000000000
4.75	872146000000	1006210000000	583772000000	3221240000000	1352900000000	3767310000000	6946690000000	10262400000000	1775720000000	801092000000	475030000000000
5	441125000000	973404000000	462957000000	3659730000000	1189240000000	2503700000000	6364380000000	11071400000000	1779400000000	290821000000	474566000000000
5.25	917516000000	1203070000000	649672000000	2815640000000	1362000000000	-1824740000000	6784400000000	12082600000000	1748150000000	506269000000	477582000000000
5.5	985572000000	1547580000000	375091000000	2925260000000	1625690000000	1468370000000	6898960000000	10313000000000	1920530000000	710378000000	474726000000000
5.75	713349000000	1170260000000	419024000000	3155470000000	1452920000000	1235750000000	6898960000000	10414100000000	1830790000000	948504000000	477832000000000
6	1167050000000	792950000000	638688000000	3188360000000	1443830000000	21315600000	7261710000000	10363500000000	2020380000000	721717000000	479938000000000
6.25	622607000000	989809000000	770487000000	3232210000000	1271070000000	-1915200000000	6956230000000	12386000000000	2051280000000	823771000000	476529000000000
6.5	1598080000000	1153860000000	495906000000	3604920000000	1252880000000	585570000000	7805840000000	10313000000000	1972370000000	778414000000	471835000000000
6.75	1212430000000	694520000000	858353000000	3736470000000	1325630000000	-1255430000000	7929940000000	11981500000000	2296680000000	937165000000	474548000000000
7	736034000000	874974000000	759504000000	3308940000000	1425650000000	1223520000000	7853570000000	11981500000000	2334100000000	812432000000	472388000000000
7.25	1030940000000	1235880000000	649672000000	3188360000000	1443830000000	-195167000000	8044490000000	11779300000000	2117230000000	1095920000000	472299000000000
7.5	1348540000000	1186670000000	792454000000	3144510000000	1198330000000	2135550000000	8607710000000	12436600000000	2347900000000	993862000000	469175000000000
7.75	1099000000000	1350720000000	968185000000	3572040000000	1698430000000	-16804400000	7786750000000	10211800000000	2379010000000	1039220000000	471728000000000
8	917516000000	1268690000000	858353000000	3418570000000	1243790000000	-1490950000000	8588620000000	11627600000000	2575740000000	959843000000	473263000000000
8.25	1167050000000	1777240000000	836386000000	3122580000000	1707520000000	-751603000000	8168590000000	10464600000000	2657900000000	1061900000000	473745000000000
8.5	1507330000000	1531170000000	517873000000	3133550000000	1725710000000	-1459470000000	8664990000000	9554530000000	2568600000000	1027880000000	473495000000000
8.75	1144370000000	1842860000000	408041000000	3561070000000	1480200000000	27996800000	8798640000000	10818600000000	2768540000000	631002000000	472656000000000
9	1371220000000	1252290000000	572789000000	3528190000000	1380180000000	1222330000000	9113660000000	9200600000000	2482170000000	1424760000000	471478000000000
9.25	1598080000000	1170260000000	891303000000	3341830000000	1362000000000	-2615200000000	8416790000000	9554530000000	2789050000000	1266010000000	474994000000000
9.5	826775000000	1301500000000	737537000000	3133550000000	1398370000000	775652000000	8817730000000	10060200000000	2975120000000	1061900000000	474137000000000
9.75	599922000000	1531170000000	561806000000	2914300000000	1416550000000	-270496000000	9333220000000	9959030000000	2840970000000	1129930000000	475994000000000
10	894831000000	1301500000000	1001130000000	3550110000000	1380180000000	-2292420000000	8808180000000	10666900000000	2644580000000	1334040000000	476600000000000
10.25	917516000000	1760840000000	1001130000000	3955720000000	1616590000000	-2400350000000	9065930000000	9706220000000	3072490000000	993862000000	474351000000000
10.5	1030940000000	956999000000	660655000000	3199320000000	1571130000000	-1804680000000	9896440000000	10717500000000	3137450000000	1050560000000	471281000000000
10.75	1280480000000	1695220000000	583772000000	3626850000000	1680240000000	-937475000000	9228210000000	6369120000000	3137770000000	993862000000	472227000000000
11	667978000000	1334310000000	616722000000	3835130000000	1525670000000	1095550000000	9982360000000	9605090000000	3062150000000	1424760000000	471353000000000
11.25	940202000000	1022620000000	572789000000	3265090000000	1853000000000	1589770000000	9371400000000	9150040000000	3130160000000	1073240000000	468068000000000
11.5	849460000000	1055430000000	990152000000	3846090000000	1471110000000	-4023410000000	10373700000000	7784860000000	3013420000000	1152610000000	471496000000000
11.75	804090000000	1465550000000	726554000000	3659730000000	1634780000000	2090060000000	9886890000000	10414100000000	3351030000000	1220650000000	469907000000000
12	1507330000000	1268690000000	825403000000	3758400000000	1689330000000	-2495870000000	9867800000000	9554530000000	3099630000000	1050560000000	473316000000000
12.25	441125000000	1317910000000	550823000000	3933790000000	1707520000000	1068000000000	9638690000000	9402850000000	3309760000000	1220650000000	470478000000000
12.5	1212430000000	1235880000000	638688000000	3078740000000	1853000000000	-721188000000	9877350000000	7987110000000	3289210000000	1141270000000	468550000000000
12.75	713349000000	1317910000000	847370000000	3637810000000	1716610000000	472290000000	9590960000000	9150040000000	3262140000000	1526810000000	468175000000000
13	1280480000000	1728030000000	572789000000	3868020000000	1671150000000	-612680000000	9982360000000	10110700000000	3485860000000	1311360000000	468568000000000
13.25	667978000000	1416340000000	693605000000	3944750000000	1907560000000	-348869000000	10469200000000	8694980000000	3203290000000	1209310000000	469354000000000
13.5	736034000000	1285100000000	627705000000	4109190000000	1789350000000	-1196960000000	10144600000000	9554530000000	3437100000000	1436100000000	472799000000000
13.75	1189740000000	1941290000000	781470000000	3396640000000	1843910000000	-937699000000	10994200000000	8543290000000	3195920000000	1356720000000	471085000000000
14	894831000000	1449150000000	979168000000	3846090000000	1762080000000	-3703980000000	10564700000000	8796100000000	3272210000000	1334040000000	471513000000000
14.25	486495000000	1383530000000	682621000000	3944750000000	1762080000000	-231772000000	10593300000000	7835420000000	3706630000000	1322700000000	471799000000000
14.5	1076310000000	1514770000000	1132930000000	3955720000000	1707520000000	410351000000	10660100000000	10616300000000	3768390000000	1220650000000	467765000000000
14.75	1257800000000	1531170000000	495906000000	3692620000000	1834820000000	-3838790000000	11108800000000	7734300000000	3851400000000	1379400000000	471817000000000
15	577237000000	2088940000000	913269000000	3911870000000	1934840000000	-2661650000000	11185200000000	9807340000000	3513690000000	1254670000000	470871000000000
15.25	917516000000	1350720000000	957202000000	4010530000000	1971210000000	-2630910000000	11175600000000	9655660000000	3399940000000	1277350000000	472477000000000
15.5	872146000000	1088240000000	572789000000	3999560000000	1671150000000	-2481870000000	10841500000000	8037670000000	3899530000000	1175290000000	472352000000000
15.75	214271000000	1662410000000	902286000000	4262660000000	1780260000000	-2458180000000	11032400000000	8897230000000	3862100000000	1504130000000	469068000000000
16	1484650000000	1514770000000	627705000000	4306510000000	2234900000000	-1758230000000	11490600000000	9857910000000	3920160000000	1390740000000	470317000000000
16.25	1348540000000	1514770000000	1034080000000	3911870000000	2089410000000	-520102000000	10870100000000	8138790000000	3778840000000	1560830000000	464927000000000
16.5	645293000000	1908480000000	616722000000	4712110000000	1889370000000	2390880000000	10975200000000	6520810000000	3861600000000	1345380000000	468104000000000
16.75	917516000000	1432740000000	715571000000	4021490000000	1998490000000	1282520000000	11891600000000	7532050000000	3913880000000	1526810000000	468122000000000
17	1212430000000	1383530000000	781470000000	4427090000000	2253080000000	1556350000000	10927400000000	6925300000000	4058370000000	1266010000000	468300000000000
17.25	736034000000	858569000000	660655000000	3988600000000	1880280000000	-612736000000	11108800000000	6116310000000	4102890000000	1300020000000	468283000000000
17.5	985572000000	1039020000000	671638000000	4021490000000	1971210000000	361690000000	11777000000000	8189360000000	3806780000000	1617530000000	462678000000000
17.75	1212430000000	1613200000000	968185000000	4580560000000	1752980000000	-2601520000000	11442900000000	7430930000000	4030600000000	1504130000000	467229000000000
18	940202000000	1514770000000	792454000000	4142070000000	1862100000000	465174000000	11337900000000	7784860000000	4041910000000	1243330000000	468086000000000
18.25	1167050000000	1252290000000	759504000000	4328430000000	1843910000000	-1503060000000	12053900000000	6975870000000	4123390000000	1277350000000	468390000000000
18.5	1189740000000	1744430000000	1132930000000	4350360000000	1734800000000	1026510000000	11328400000000	6520810000000	3989840000000	1742260000000	465766000000000
18.75	622607000000	1711620000000	792454000000	4295550000000	1743890000000	-3332740000000	11786600000000	7532050000000	4055330000000	1640210000000	471977000000000
19	962887000000	1580390000000	902286000000	4459980000000	1752980000000	301506000000	11862900000000	8037670000000	4137940000000	1583510000000	466034000000000
19.25	872146000000	1744430000000	1045070000000	4207850000000	1998490000000	-587388000000	11567000000000	7936550000000	3813120000000	1708240000000	463106000000000
19.5	849460000000	1186670000000	913269000000	4185920000000	2143970000000	1231230000000	12254300000000	7178120000000	4175520000000	1628870000000	465159000000000
19.75	531866000000	2105340000000	737537000000	4427090000000	2107600000000	481750000000	11328400000000	7329800000000	4468110000000	1481450000000	464713000000000
20	554551000000	2138150000000	935236000000	3977640000000	2007580000000	-413250000000	11920200000000	5812940000000	4265460000000	1549490000000	466837000000000
20.25	1144370000000	1728030000000	979168000000	4339390000000	1771170000000	-1034020000000	12846200000000	7582610000000	4337080000000	1798960000000	471139000000000
20.5	1325850000000	1498360000000	605739000000	4668260000000	2098510000000	-2895040000000	11614700000000	7076990000000	4106730000000	1390740000000	464891000000000
20.75	917516000000	1810050000000	825403000000	4262660000000	2207620000000	53625700000	12722100000000	7936550000000	4375510000000	1424760000000	468907000000000
21	1257800000000	1416340000000	1001130000000	4174960000000	1907560000000	-1083930000000	12951200000000	7279240000000	4392740000000	1538150000000	464855000000000
21.25	1008260000000	1646000000000	880319000000	4295550000000	1680240000000	-3159840000000	12722100000000	5459000000000	4147470000000	1379400000000	469425000000000
21.5	1121680000000	1711620000000	1067030000000	4701150000000	2189430000000	1800590000000	11929800000000	6571370000000	4213430000000	1674220000000	462410000000000
21.75	1439280000000	2072530000000	913269000000	4350360000000	1943930000000	-2633060000000	12960700000000	7582610000000	4530380000000	1946370000000	466712000000000
22	736034000000	1613200000000	946219000000	4240730000000	2107600000000	-611529000000	12531200000000	7683740000000	4606640000000	1436100000000	464106000000000
22.25	736034000000	1908480000000	1012120000000	4196890000000	2225800000000	2247260000000	12359300000000	8492730000000	4337260000000	2003060000000	464838000000000
22.5	962887000000	1547580000000	726554000000	5380810000000	2062140000000	-791155000000	12540700000000	7633170000000	4781930000000	1402080000000	468568000000000
22.75	1121680000000	2006910000000	693605000000	4986170000000	1907560000000	-1063670000000	12664800000000	8796100000000	4799200000000	1935030000000	464784000000000
23	1030940000000	1596790000000	902286000000	4657300000000	2271270000000	-2718690000000	12588400000000	6268000000000	4313390000000	1764940000000	469586000000000
23.25	1575390000000	1531170000000	836386000000	4876550000000	2043950000000	-3064590000000	12703000000000	8947790000000	4406630000000	1640210000000	469032000000000
23.5	985572000000	1695220000000	1034080000000	4503830000000	2089410000000	-519751000000	12664800000000	6773620000000	4565700000000	1764940000000	461553000000000
23.75	1348540000000	1432740000000	1023100000000	4942320000000	2262180000000	-352224000000	13304400000000	7380360000000	4740480000000	1628870000000	467765000000000
24	736034000000	1892080000000	1078020000000	4405170000000	2134880000000	639508000000	12874800000000	6520810000000	4506370000000	1798960000000	462499000000000
24.25	1507330000000	2023320000000	1220800000000	4920390000000	1807540000000	869269000000	12225700000000	7228680000000	4448090000000	1719580000000	465462000000000
24.5	146215000000	1662410000000	1220800000000	4602490000000	1989390000000	-1304260000000	13075300000000	7430930000000	4799410000000	1855650000000	468604000000000
24.75	1484650000000	2187370000000	1089000000000	4427090000000	2425840000000	-1252850000000	13103900000000	7784860000000	4327540000000	1470110000000	467051000000000
25	1235110000000	2285800000000	792454000000	4547680000000	2053040000000	-1556230000000	12512100000000	6824180000000	4744620000000	1515470000000	466176000000000
25.25	781405000000	1301500000000	1330630000000	3813210000000	1998490000000	-1375700000000	12426200000000	6520810000000	4913900000000	1912350000000	466283000000000
25.5	1461960000000	2056130000000	1187850000000	4690190000000	2371290000000	168015000000	13648100000000	9150040000000	4661100000000	1821630000000	462731000000000
25.75	872146000000	1629600000000	968185000000	4350360000000	1989390000000	-3105350000000	12388000000000	7076990000000	4810090000000	1730920000000	468033000000000
26	622607000000	2039720000000	968185000000	4459980000000	2116690000000	-1256140000000	13600300000000	7329800000000	4833780000000	1969050000000	460661000000000
26.25	1053630000000	1219480000000	1110970000000	4854620000000	2098510000000	-4353310000000	13008500000000	7380360000000	4655150000000	1526810000000	469800000000000
26.5	1439280000000	1695220000000	935236000000	4251700000000	2362200000000	688015000000	13304400000000	5509570000000	5051600000000	1640210000000	461643000000000
26.75	1257800000000	1613200000000	924252000000	4843660000000	2453120000000	219371000000	13877200000000	5711810000000	4657980000000	1866990000000	460893000000000
27	1235110000000	1399930000000	1198830000000	4821730000000	2534960000000	-2341400000000	12970300000000	8037670000000	4930500000000	1844310000000	464713000000000
27.25	1099000000000	2088940000000	913269000000	4547680000000	2416750000000	-536383000000	13552600000000	7026430000000	4620120000000	1901010000000	464641000000000
27.5	1167050000000	1777240000000	1209820000000	4306510000000	1816630000000	-1904740000000	12846200000000	5762380000000	4958530000000	1901010000000	462660000000000
27.75	1439280000000	2187370000000	1550300000000	5019050000000	2143970000000	1083210000000	12598000000000	8694980000000	4671890000000	1787620000000	465337000000000
28	917516000000	1498360000000	1110970000000	4591530000000	2180340000000	398056000000	13056200000000	6824180000000	4878350000000	2003060000000	467122000000000
28.25	1439280000000	1498360000000	1132930000000	4679220000000	1916650000000	-5270340000000	13151700000000	6621930000000	4865500000000	2093780000000	468229000000000
28.5	1076310000000	2466250000000	1385550000000	4854620000000	2189430000000	-2768320000000	13791300000000	8442170000000	5005700000000	1685560000000	464731000000000
28.75	1484650000000	2581080000000	1143920000000	4701150000000	2189430000000	1444320000000	12874800000000	7633170000000	4996240000000	1719580000000	465837000000000
29	1325850000000	2417040000000	1154900000000	4646340000000	2471310000000	1405270000000	13619400000000	6318560000000	4730190000000	1810300000000	463231000000000
29.25	1008260000000	1957700000000	671638000000	4777880000000	2207620000000	614118000000	13419000000000	5762380000000	5017260000000	1617530000000	462303000000000
29.5	1144370000000	2269390000000	1078020000000	4690190000000	2362200000000	-1075630000000	13294900000000	8644420000000	5065160000000	1764940000000	465855000000000
29.75	1076310000000	1465550000000	1319650000000	4690190000000	2307640000000	-2944800000000	13380800000000	9048910000000	4975730000000	1889670000000	464552000000000
30	622607000000	1793650000000	1067030000000	4394210000000	2234900000000	-2226630000000	13829400000000	6672490000000	5095360000000	2037080000000	465623000000000
30.25	1280480000000	2302200000000	1407510000000	4613450000000	2198530000000	-486220000000	13447600000000	8239920000000	5030570000000	1878330000000	461892000000000
30.5	1121680000000	1892080000000	1089000000000	4635380000000	2062140000000	1613640000000	13810300000000	6268000000000	4934320000000	1764940000000	460554000000000
30.75	1507330000000	2105340000000	1264730000000	4920390000000	2353100000000	-2213930000000	13648100000000	6065750000000	4892490000000	1810300000000	463178000000000
31	736034000000	1728030000000	1012120000000	4975210000000	2207620000000	466915000000	12960700000000	5357880000000	4947780000000	1730920000000	456306000000000
31.25	1598080000000	2006910000000	990152000000	4854620000000	2344010000000	-979525000000	13504900000000	6470250000000	4910750000000	1832970000000	464659000000000
31.5	1439280000000	2203770000000	1242770000000	4799810000000	2344010000000	2038340000000	13524000000000	4498330000000	4875380000000	1935030000000	459572000000000
31.75	1099000000000	1875670000000	1176870000000	4723070000000	2380380000000	-2281290000000	13915400000000	6773620000000	5048330000000	1866990000000	466158000000000
32	1507330000000	2318610000000	1089000000000	4964240000000	2380380000000	270025000000	13266200000000	7885980000000	5036870000000	2173160000000	465801000000000
32.25	1257800000000	1235880000000	1154900000000	4547680000000	2216710000000	-591655000000	13972600000000	6166870000000	4903120000000	1640210000000	462035000000000
32.5	1280480000000	1629600000000	1506360000000	4712110000000	2434940000000	-1410820000000	13428500000000	5459000000000	5113420000000	1901010000000	463035000000000
32.75	1666130000000	2482660000000	1110970000000	4372280000000	2289450000000	-4679740000000	13886700000000	7885980000000	4978590000000	2105120000000	465177000000000
33	1280480000000	2170960000000	1176870000000	4690190000000	2544050000000	-3763850000000	13810300000000	5610690000000	4954630000000	2014400000000	466123000000000
33.25	758719000000	2252990000000	935236000000	4558640000000	2344010000000	-458051000000	13810300000000	8189360000000	5185760000000	1935030000000	465909000000000
33.5	1348540000000	2203770000000	1089000000000	5205410000000	2134880000000	-3626380000000	13982200000000	5003950000000	4813790000000	2093780000000	469068000000000
33.75	1348540000000	2745130000000	1330630000000	4668260000000	2344010000000	-3727660000000	13810300000000	6672490000000	4944660000000	2003060000000	469711000000000
34	1371220000000	1908480000000	1374560000000	3955720000000	2062140000000	-2991540000000	14134900000000	7026430000000	4988860000000	1946370000000	464088000000000
34.25	1144370000000	2170960000000	1385550000000	5161560000000	2253080000000	-1090530000000	14087200000000	6369120000000	5189620000000	1901010000000	462249000000000
34.5	1303170000000	1924890000000	1451450000000	4821730000000	2534960000000	-1913050000000	14068100000000	7683740000000	5192360000000	2218510000000	461660000000000
34.75	1484650000000	2236580000000	1154900000000	4328430000000	2371290000000	-43078400000	13867600000000	9251160000000	4982580000000	2127800000000	461875000000000
35	1711500000000	2121750000000	1176870000000	5073870000000	2234900000000	-2828260000000	14010800000000	5964630000000	4837470000000	2037080000000	464141000000000
35.25	1076310000000	2006910000000	1078020000000	5665830000000	2216710000000	208100000000	13724400000000	6874740000000	4919710000000	2173160000000	460304000000000
35.5	962887000000	1842860000000	1176870000000	4931360000000	2198530000000	-1552860000000	14411800000000	6571370000000	5051200000000	2127800000000	462678000000000
35.75	1280480000000	2056130000000	1143920000000	4690190000000	2271270000000	-2606850000000	13543100000000	5509570000000	5147490000000	1764940000000	460732000000000
36	1053630000000	2318610000000	1330630000000	5040980000000	2271270000000	53822500000	13867600000000	5459000000000	5054470000000	2116460000000	459590000000000
36.25	1076310000000	2367820000000	1286700000000	5238300000000	2444030000000	504305000000	14125400000000	5105070000000	5378340000000	2127800000000	460804000000000
36.5	872146000000	2695920000000	1297680000000	5040980000000	2353100000000	-972914000000	13237600000000	7127550000000	5144170000000	2331910000000	462178000000000
36.75	645293000000	2072530000000	1451450000000	4975210000000	2025760000000	1915080000000	14211300000000	7026430000000	4971760000000	2275210000000	461892000000000
37	1552710000000	2827160000000	1418500000000	4712110000000	2489490000000	486592000000	14220800000000	5711810000000	5364740000000	1844310000000	463552000000000
37.25	1620760000000	2515470000000	957202000000	4953280000000	2544050000000	-725553000000	14230400000000	5914060000000	4982180000000	2139140000000	461821000000000
37.5	1371220000000	2695920000000	1407510000000	5216370000000	2534960000000	292187000000	13924900000000	7026430000000	4941350000000	2071100000000	459893000000000
37.75	1416590000000	1990510000000	1099980000000	5084830000000	2143970000000	-2853020000000	14010800000000	5408440000000	5078510000000	2275210000000	462000000000000
38	1756870000000	1941290000000	1078020000000	4734040000000	2371290000000	-201511000000	13762600000000	4852260000000	4999610000000	2320570000000	460661000000000
38.25	1598080000000	1629600000000	1363580000000	4810770000000	2180340000000	-3017390000000	14115800000000	5155630000000	5017200000000	2082440000000	466694000000000
38.5	1144370000000	1531170000000	1110970000000	4887510000000	2507680000000	3582900000000	14278100000000	6268000000000	5233150000000	2025740000000	460304000000000
38.75	1212430000000	1793650000000	1165880000000	4810770000000	2289450000000	-862862000000	13915400000000	5105070000000	4899810000000	2003060000000	459733000000000
39	1643450000000	1826460000000	1121950000000	4668260000000	2334920000000	-2053670000000	14803100000000	4852260000000	4951100000000	1912350000000	463356000000000
39.25	1393910000000	2220180000000	1165880000000	4898470000000	2480400000000	804046000000	14259000000000	7178120000000	4937620000000	1969050000000	458662000000000
39.5	1439280000000	2170960000000	1363580000000	5391770000000	2325820000000	-1942390000000	14411800000000	4650010000000	5072230000000	1708240000000	467194000000000
39.75	1212430000000	1990510000000	1034080000000	4986170000000	2444030000000	-2148640000000	13571700000000	5509570000000	4823330000000	2082440000000	465177000000000
40	1371220000000	2285800000000	1012120000000	5030020000000	2553140000000	-964605000000	13944000000000	5661250000000	5027510000000	2150480000000	463178000000000
40.25	1530020000000	2318610000000	1286700000000	4120150000000	2507680000000	-1342270000000	13810300000000	5964630000000	4906650000000	1935030000000	460964000000000
40.5	1099000000000	2646700000000	1495380000000	5183490000000	2589510000000	-128246000000	14173100000000	5054510000000	4692840000000	1946370000000	461946000000000
40.75	781405000000	1892080000000	1264730000000	5194450000000	2616790000000	-2066660000000	13886700000000	4397200000000	5102770000000	2263870000000	464374000000000
41	1325850000000	2499060000000	1539310000000	4909430000000	2307640000000	-1076930000000	13896300000000	5863500000000	5220430000000	1719580000000	464374000000000
41.25	1802240000000	2548270000000	1023100000000	4525750000000	2489490000000	-1516770000000	14449900000000	5914060000000	5105960000000	1651540000000	465694000000000
41.5	1552710000000	2154560000000	1110970000000	4602490000000	2689530000000	-2498510000000	14049000000000	6166870000000	5050740000000	1810300000000	459893000000000
41.75	1552710000000	2236580000000	1363580000000	4766920000000	2307640000000	924274000000	14106300000000	6015190000000	4955030000000	2218510000000	461553000000000
42	1779560000000	2170960000000	1264730000000	4470940000000	2553140000000	-3166990000000	13991700000000	4801700000000	4975760000000	2331910000000	463963000000000
42.25	1688820000000	2794350000000	968185000000	4580560000000	2407660000000	402056000000	13934400000000	7026430000000	5336980000000	2433960000000	461678000000000
42.5	1348540000000	1695220000000	1121950000000	4810770000000	2507680000000	-61184200000	13705300000000	6773620000000	5151170000000	2105120000000	462624000000000
42.75	894831000000	1810050000000	1396530000000	4876550000000	2471310000000	-2386540000000	13791300000000	5914060000000	5130770000000	1855650000000	462071000000000
43	1461960000000	2794350000000	1286700000000	4547680000000	2698630000000	-643235000000	14306700000000	4650010000000	4768350000000	2003060000000	462731000000000
43.25	1076310000000	2466250000000	1187850000000	4887510000000	2534960000000	-2918780000000	13800800000000	3739890000000	4957780000000	1957710000000	462803000000000
43.5	2233270000000	1859270000000	1275720000000	4810770000000	2153060000000	-1045670000000	14211300000000	4599450000000	5209720000000	1991730000000	463463000000000
43.75	1552710000000	2318610000000	1132930000000	4876550000000	2680440000000	-376982000000	13944000000000	5964630000000	5224160000000	2071100000000	465623000000000
44	1892990000000	2384230000000	1627180000000	5369850000000	2525860000000	-2240120000000	13543100000000	4751140000000	4999510000000	1901010000000	464070000000000
44.25	1507330000000	2335010000000	1671110000000	4876550000000	2198530000000	-3039650000000	13819900000000	3841020000000	5120300000000	1991730000000	466944000000000
44.5	1235110000000	2663110000000	1187850000000	4766920000000	2653160000000	-734269000000	13934400000000	6470250000000	5247300000000	2207170000000	463909000000000
44.75	1666130000000	2170960000000	1572260000000	5578130000000	2689530000000	-652625000000	14564500000000	5003950000000	5306450000000	1889670000000	461393000000000
45	1257800000000	2974800000000	1330630000000	4624410000000	2925940000000	-19681300000	14325800000000	6015190000000	5275560000000	2082440000000	462249000000000
45.25	1257800000000	2121750000000	1132930000000	5227340000000	2716810000000	-1395790000000	14507200000000	4700570000000	4989290000000	1969050000000	462124000000000
45.5	1575390000000	2564680000000	1231780000000	5172530000000	2453120000000	-819605000000	14784100000000	4599450000000	4824200000000	1923690000000	463124000000000
45.75	1348540000000	2646700000000	1264730000000	4799810000000	2362200000000	-1592200000000	14812700000000	4245510000000	5150970000000	2105120000000	463731000000000
46	690663000000	2433440000000	1550300000000	4953280000000	2616790000000	-595290000000	15013200000000	4953380000000	5116970000000	2127800000000	459019000000000
46.25	1303170000000	2105340000000	1594230000000	5216370000000	2634980000000	-1240940000000	14306700000000	6419680000000	4992700000000	2014400000000	460607000000000
46.5	1711500000000	2777940000000	1780940000000	4997130000000	2534960000000	-1139150000000	14325800000000	6268000000000	5158090000000	2354580000000	462535000000000
46.75	1303170000000	2302200000000	1374560000000	4810770000000	2243990000000	-942457000000	14621800000000	5560130000000	4851860000000	2218510000000	462357000000000
47	1325850000000	1990510000000	1462430000000	4821730000000	2935040000000	-3863530000000	14755400000000	7329800000000	5116220000000	2014400000000	464588000000000
47.25	1325850000000	2810750000000	1682090000000	4854620000000	2434940000000	-1223410000000	14736300000000	4650010000000	5106040000000	2105120000000	462089000000000
47.5	1711500000000	2777940000000	1802910000000	4909430000000	2844110000000	-556355000000	14230400000000	5863500000000	5127330000000	2059760000000	461054000000000
47.75	1393910000000	1974100000000	1418500000000	5402730000000	2962310000000	-1660810000000	14516800000000	3487080000000	4961320000000	2297890000000	465516000000000
48	1824930000000	3270090000000	1693080000000	4909430000000	2798650000000	646288000000	14287700000000	5812940000000	4792760000000	2252530000000	460875000000000
48.25	1711500000000	2138150000000	1660130000000	5084830000000	2534960000000	-1830440000000	14058500000000	6116310000000	4969070000000	2161820000000	458912000000000
48.5	2142520000000	2039720000000	1176870000000	4591530000000	2580420000000	-2333260000000	14784100000000	4700570000000	5030740000000	2354580000000	464855000000000
48.75	1348540000000	2909180000000	1550300000000	4799810000000	2798650000000	-1119740000000	13963100000000	5155630000000	5026760000000	2116460000000	463267000000000
49	1620760000000	2039720000000	1495380000000	5019050000000	2862290000000	2338530000000	13524000000000	6065750000000	4844730000000	2025740000000	459715000000000
49.25	2006410000000	2056130000000	1297680000000	4668260000000	2607700000000	-1791110000000	14278100000000	3638770000000	4803080000000	2082440000000	462946000000000
49.5	1575390000000	2876370000000	1418500000000	4832700000000	2735000000000	904807000000	14927200000000	5357880000000	5202830000000	2229850000000	460536000000000
49.75	1371220000000	2663110000000	1791930000000	4613450000000	2434940000000	897115000000	14793600000000	6470250000000	5226760000000	2082440000000	462678000000000
50	1756870000000	2302200000000	1671110000000	4843660000000	2753180000000	-1182760000000	14640900000000	7430930000000	5016570000000	2479320000000	462517000000000
50.25	1552710000000	2072530000000	1517350000000	5194450000000	2498590000000	-351746000000	14125400000000	5256760000000	4772510000000	2388600000000	459875000000000
50.5	2187890000000	2318610000000	1660130000000	4514790000000	2698630000000	-947019000000	13495300000000	5459000000000	5048310000000	1776280000000	464945000000000
50.75	1756870000000	1924890000000	1308670000000	5326000000000	2744090000000	-3767770000000	14564500000000	3891580000000	5379410000000	1901010000000	461678000000000
51	2074470000000	3499760000000	1462430000000	4986170000000	3025960000000	183679000000	13905800000000	5357880000000	4961720000000	2048420000000	459875000000000
51.25	1666130000000	3040420000000	1352600000000	5380810000000	2598610000000	-3617530000000	14583600000000	5711810000000	4940930000000	2241190000000	462464000000000
51.5	1325850000000	2499060000000	1583250000000	4723070000000	2425840000000	-710296000000	14459500000000	6773620000000	4899580000000	2093780000000	462053000000000
51.75	962887000000	2597490000000	1583250000000	5358880000000	2725900000000	-205385000000	14984500000000	6318560000000	4765280000000	2082440000000	461589000000000
52	1711500000000	3368520000000	1374560000000	4854620000000	2816830000000	-2331900000000	14220800000000	5762380000000	4896430000000	2127800000000	466623000000000
52.25	1393910000000	2318610000000	1671110000000	4745000000000	3353300000000	-1538180000000	14154000000000	5863500000000	5071710000000	2263870000000	465141000000000
52.5	2006410000000	2499060000000	1330630000000	4613450000000	2671350000000	305282000000	13829400000000	5105070000000	4799180000000	2139140000000	459447000000000
52.75	1212430000000	2138150000000	1758980000000	4953280000000	2516770000000	973230000000	13905800000000	3082590000000	4755140000000	2263870000000	462981000000000
53	1507330000000	2105340000000	1846840000000	4712110000000	2607700000000	-1260920000000	14774500000000	4144390000000	4988880000000	1832970000000	462107000000000
53.25	1643450000000	2351420000000	1385550000000	5040980000000	2598610000000	356511000000	14211300000000	5762380000000	4940640000000	2547350000000	462124000000000
53.5	1303170000000	3434140000000	1802910000000	4657300000000	2398570000000	1220720000000	14497700000000	5357880000000	4661680000000	1991730000000	458108000000000
53.75	872146000000	2712320000000	1473410000000	4964240000000	2389470000000	-1585030000000	14039500000000	4953380000000	4862120000000	2513340000000	464106000000000
54	1892990000000	2367820000000	1737010000000	4876550000000	2562240000000	-752024000000	14784100000000	4498330000000	5185450000000	2025740000000	461286000000000
54.25	2097150000000	3155260000000	1682090000000	4372280000000	2389470000000	3828050000	13944000000000	5307320000000	4986050000000	2241190000000	463195000000000
54.5	1711500000000	2581080000000	1550300000000	4788850000000	2344010000000	-35050100000	14239900000000	3841020000000	4772360000000	2229850000000	461446000000000
54.75	1666130000000	2810750000000	1473410000000	4240730000000	2671350000000	251989000000	14545400000000	4953380000000	4551580000000	2433960000000	461750000000000
55	1484650000000	2679510000000	1594230000000	5928920000000	2607700000000	-2815390000000	13266200000000	3790460000000	5099540000000	2286550000000	462553000000000
55.25	1416590000000	2974800000000	1407510000000	4273620000000	2662250000000	449595000000	14077600000000	5408440000000	4824670000000	2717440000000	461054000000000
55.5	1734190000000	2482660000000	1715040000000	4635380000000	2516770000000	1206360000000	14774500000000	7076990000000	4979360000000	2411280000000	462446000000000
55.75	1598080000000	2679510000000	1758980000000	4734040000000	3035060000000	-999890000000	14994100000000	6015190000000	4940740000000	2377260000000	459072000000000
56	1461960000000	2515470000000	1693080000000	4843660000000	2735000000000	-1233360000000	14020400000000	6116310000000	4806760000000	2241190000000	457894000000000
56.25	1552710000000	1924890000000	1275720000000	4690190000000	2516770000000	317184000000	14230400000000	5610690000000	5044830000000	2524680000000	458090000000000
56.5	1439280000000	2613890000000	1824880000000	4821730000000	2698630000000	-19063900000	14144500000000	5509570000000	4606900000000	2343250000000	465391000000000
56.75	1824930000000	3237280000000	1802910000000	5150600000000	2716810000000	-702339000000	14364000000000	5357880000000	4845340000000	2173160000000	466426000000000
57	1666130000000	2269390000000	1638160000000	4755960000000	2580420000000	-940296000000	13858100000000	4346640000000	4968730000000	2388600000000	463035000000000
57.25	1257800000000	2810750000000	1747990000000	4427090000000	2998690000000	-1357940000000	14717200000000	5509570000000	4720440000000	2241190000000	463820000000000
57.5	1393910000000	2531870000000	1967660000000	4536720000000	2925940000000	2457680000000	14736300000000	5509570000000	4723990000000	2513340000000	462267000000000
57.75	1552710000000	2679510000000	1385550000000	4799810000000	2725900000000	-830356000000	13991700000000	3992700000000	4847310000000	2638070000000	460018000000000
58	1393910000000	2384230000000	1660130000000	4492870000000	2898670000000	-947005000000	14411800000000	4043270000000	5102920000000	2309230000000	459858000000000
58.25	2119840000000	3007610000000	1627180000000	4438050000000	2498590000000	-564566000000	14134900000000	4498330000000	4520310000000	2433960000000	465712000000000
58.5	1847610000000	3007610000000	1638160000000	5008090000000	2753180000000	-43078400000	14497700000000	5206190000000	4765390000000	2320570000000	461875000000000
58.75	1484650000000	2843560000000	1934710000000	4777880000000	2853200000000	-317935000000	14421300000000	3992700000000	4947860000000	2536010000000	461643000000000
59	1439280000000	3040420000000	1473410000000	4646340000000	3226000000000	133572000000	14574000000000	5155630000000	4899520000000	2502000000000	462910000000000
59.25	1325850000000	2236580000000	1550300000000	4449020000000	2853200000000	-3062920000000	14507200000000	5610690000000	4941390000000	2195830000000	462053000000000
59.5	1756870000000	2876370000000	1495380000000	5282150000000	2898670000000	-2732610000000	13676700000000	5762380000000	4810370000000	2297890000000	460661000000000
59.75	1461960000000	2515470000000	1594230000000	5030020000000	2907760000000	942436000000	14392700000000	3942140000000	4786160000000	2479320000000	461089000000000
60	2029100000000	2941990000000	1616200000000	4613450000000	2844110000000	-820503000000	14392700000000	6268000000000	4775890000000	2411280000000	458555000000000

## Sheet: 600K
Time (ms)	m/z 28 Ethene	m/z 30 Formaldehyde	m/z 56 Acrolein	m/z 70 (2,3-DHF & 2,5-DHF)	m/z 86 THF-3-one	m/z 71 ROO	m/z 58 butanedial	m/z 103 OOQOOH	Sum UHP + KHP	m/z 84	m/z 72 THF
-30	247878000000	-926926000000	216807000000	78063900000	-45838500000	-492352000000	50698700000	-1332460000000	87524400000	218211000000	495818000000000
-29.75	124354000000	-160306000000	169073000000	42196700000	-213830000000	357908000000	31606500000	-68407500000	-12275300000	14102700000	495256000000000
-29.5	50239800000	249747000000	-105395000000	-113228000000	-115011000000	-1247430000000	-44762500000	892272000000	-122315000000	82138900000	502542000000000
-29.25	346696000000	-766471000000	383874000000	-388210000000	132035000000	-60011800000	260713000000	538337000000	-8775410000	104818000000	500201000000000
-29	-369740000000	107120000000	37805800000	101975000000	-65602200000	-178815000000	22060400000	1043960000000	-132554000000	-8575990000	503985000000000
-28.75	-221512000000	53635000000	49739200000	-41493400000	280262000000	2533640000000	-54308600000	-422342000000	49683000000	195532000000	498178000000000
-28.5	-97988400000	-534702000000	-129262000000	-292564000000	23334400000	-480135000000	136614000000	841710000000	73769500000	218211000000	499358000000000
-28.25	-73283700000	-409903000000	25872400000	-292564000000	132035000000	-1224760000000	-73400900000	639462000000	-49994300000	-19915300000	498515000000000
-28	99649300000	-71163700000	169073000000	-125184000000	52980000000	4254190000000	98429300000	-68407500000	-77595900000	-87951500000	492559000000000
-27.75	-97988400000	71463400000	37805800000	-208874000000	13452600000	-814459000000	50698700000	-1534710000000	22203800000	59460200000	496586000000000
-27.5	-48579000000	-17678600000	49739200000	137843000000	3570750000	1517460000000	251167000000	588899000000	-19137500000	70799500000	493496000000000
-27.25	-221512000000	392374000000	240673000000	-77360600000	72743700000	-1149780000000	-216593000000	32716600000	39290400000	240890000000	500988000000000
-27	-196807000000	-17678600000	133273000000	185665000000	62861800000	-2189610000000	-73400900000	-1332460000000	135728000000	-42594100000	500276000000000
-26.75	-221512000000	-53335300000	157140000000	42196700000	122153000000	2334550000000	127068000000	-675152000000	-118784000000	25442100000	492578000000000
-26.5	-73283700000	1087680000000	-224729000000	-65404900000	-223712000000	-766545000000	-121131000000	1145080000000	-63902200000	70799500000	497485000000000
-26.25	-172103000000	463688000000	-200862000000	-77360600000	112271000000	-2954620000000	155706000000	588899000000	-49948500000	104818000000	500763000000000
-26	-592083000000	-516873000000	-57661300000	137843000000	-65602200000	-748133000000	203437000000	487775000000	-12336500000	195532000000	497298000000000
-25.75	-23874300000	267576000000	-236662000000	-137139000000	62861800000	872434000000	155706000000	-523466000000	-94896600000	-155988000000	497186000000000
-25.5	297287000000	-374246000000	169073000000	-304519000000	-35956600000	-1987320000000	-54308600000	-270656000000	-67233900000	252229000000	504490000000000
-25.25	223173000000	356718000000	-212795000000	-184962000000	141917000000	3079450000000	165252000000	-270656000000	59968700000	-87951500000	499096000000000
-25	-443854000000	-178134000000	121339000000	233488000000	-115011000000	924120000000	289352000000	1650700000000	-22622100000	14102700000	500819000000000
-24.75	-147398000000	570658000000	157140000000	-41493400000	191326000000	390422000000	136614000000	-270656000000	8601750000	14102700000	499976000000000
-24.5	-221512000000	249747000000	-117328000000	18285200000	62861800000	-303387000000	155706000000	-675152000000	4841900000	-31254700000	500201000000000
-24.25	-270921000000	-338590000000	37805800000	-161051000000	62861800000	-651290000000	-6578000000	-624590000000	-15698800000	-8575990000	497897000000000
-24	-48579000000	588487000000	145206000000	245444000000	-45838500000	-118352000000	-216593000000	942834000000	59938100000	82138900000	499639000000000
-23.75	-48579000000	214090000000	-320196000000	113931000000	-45838500000	228584000000	88883200000	-321218000000	35912800000	-65272800000	501887000000000
-23.5	173763000000	552830000000	228740000000	18285200000	-95247700000	-653412000000	88883200000	-725714000000	-81172300000	116157000000	502805000000000
-23.25	50239800000	-320761000000	-165062000000	-125184000000	82625500000	-1198550000000	69791000000	133841000000	-87942700000	93478300000	503498000000000
-23	766677000000	499345000000	73605900000	-424077000000	220971000000	2192300000000	41152600000	1448450000000	84177400000	116157000000	495313000000000
-22.75	-23874300000	-570359000000	-367929000000	-29537700000	112271000000	-1171090000000	-283416000000	184403000000	125259000000	116157000000	501006000000000
-22.5	494925000000	445859000000	-117328000000	-125184000000	-213830000000	319010000000	98429300000	-17845400000	63361500000	-53933400000	499283000000000
-22.25	-48579000000	-748642000000	216807000000	90019600000	309908000000	-194533000000	212983000000	791148000000	5101850000	25442100000	503385000000000
-22	643153000000	35806600000	97472700000	221533000000	181444000000	2117270000000	-130678000000	-1736960000000	-8714240000	25442100000	494095000000000
-21.75	-345036000000	-231619000000	121339000000	-137139000000	191326000000	-871563000000	-63854700000	-371780000000	166554000000	-110630000000	501756000000000
-21.5	-172103000000	-142477000000	-379863000000	-268652000000	-35956600000	1970190000000	-73400900000	892272000000	-111999000000	-87951500000	496549000000000
-21.25	-172103000000	285404000000	-21861200000	113931000000	13452600000	991254000000	-82947000000	-1130210000000	-118922000000	150175000000	499377000000000
-21	-147398000000	-249448000000	-21861200000	66108100000	-16192900000	-2168340000000	69791000000	-220094000000	-101636000000	422320000000	501512000000000
-20.75	470220000000	71463400000	-176995000000	18285200000	-144657000000	-1620400000000	165252000000	-1383020000000	-8974200000	82138900000	503498000000000
-20.5	-73283700000	-588187000000	181006000000	101975000000	-144657000000	502111000000	270260000000	437213000000	-84473400000	-133309000000	498609000000000
-20.25	173763000000	107120000000	204873000000	90019600000	3570750000	-2366700000000	-130678000000	-17845400000	73738900000	342944000000	502243000000000
-20	-122693000000	89291700000	13939000000	245444000000	82625500000	884080000000	-35216400000	-220094000000	-197921000000	-87951500000	496605000000000
-19.75	173763000000	71463400000	37805800000	101975000000	-26074800000	1404150000000	-149770000000	1195640000000	-129131000000	-53933400000	499171000000000
-19.5	149059000000	-338590000000	-81528100000	90019600000	-26074800000	920048000000	22060400000	639462000000	4918350000	116157000000	499639000000000
-19.25	-196807000000	677628000000	-57661300000	18285200000	-174303000000	-2194800000000	-25670200000	538337000000	-29469000000	-167327000000	496830000000000
-19	198468000000	71463400000	-21861200000	245444000000	52980000000	-1150750000000	41152600000	336089000000	-36178200000	14102700000	500932000000000
-18.75	396106000000	-231619000000	-93461500000	30241000000	23334400000	927669000000	-168862000000	588899000000	77208200000	59460200000	496624000000000
-18.5	-23874300000	107120000000	109406000000	137843000000	82625500000	-1321190000000	41152600000	-1029090000000	101233000000	116157000000	499827000000000
-18.25	321992000000	-231619000000	-165062000000	-77360600000	92507400000	-1024310000000	-82947000000	-523466000000	-5244930000	-31254700000	500107000000000
-18	198468000000	499345000000	169073000000	-41493400000	-164421000000	-1418630000000	-16124100000	285527000000	-32938300000	116157000000	502336000000000
-17.75	494925000000	249747000000	181006000000	66108100000	132035000000	1247350000000	-92493100000	-1736960000000	-118784000000	-76612100000	502318000000000
-17.5	420811000000	356718000000	-21861200000	197621000000	43098100000	-2690190000000	2968120000	32716600000	49820700000	172854000000	501044000000000
-17.25	-147398000000	107120000000	-165062000000	-376254000000	-6311100000	-818467000000	2968120000	690024000000	56499300000	70799500000	500126000000000
-17	-48579000000	-374246000000	-45727900000	137843000000	-124893000000	-1844370000000	212983000000	-978525000000	4979520000	-65272800000	496137000000000
-16.75	25535100000	641972000000	169073000000	6329500000	43098100000	1861450000000	31606500000	336089000000	25474300000	59460200000	496830000000000
-16.5	371401000000	-516873000000	-9927770000	376957000000	-105130000000	-322163000000	-63854700000	-169532000000	-80973500000	2763370000	497223000000000
-16.25	-270921000000	-374246000000	-248595000000	365001000000	211090000000	266421000000	-121131000000	740586000000	-8790700000	-42594100000	500313000000000
-16	-814425000000	463688000000	2005610000	30241000000	-233594000000	-2326520000000	212983000000	639462000000	-25953800000	-42594100000	502692000000000
-15.75	74944600000	-213791000000	49739200000	66108100000	-233594000000	54783200000	117522000000	892272000000	73754200000	-144648000000	499958000000000
-15.5	-270921000000	178434000000	73605900000	-113228000000	52980000000	361744000000	60244900000	-1484150000000	-18969300000	-42594100000	502711000000000
-15.25	223173000000	249747000000	-9927770000	-244741000000	-55720300000	1033620000000	-159316000000	-574028000000	-43239200000	-178666000000	499639000000000
-15	25535100000	178434000000	-141195000000	137843000000	-223712000000	7946740000	-140224000000	487775000000	-15805800000	48120800000	502580000000000
-14.75	297287000000	249747000000	181006000000	-376254000000	132035000000	2014900000000	-44762500000	-1130210000000	46351400000	36781500000	498834000000000
-14.5	198468000000	-409903000000	-200862000000	42196700000	-95247700000	906628000000	-207047000000	-877401000000	70239000000	104818000000	502318000000000
-14.25	-666197000000	338889000000	2005610000	233488000000	-6311100000	1499160000000	174798000000	-826839000000	53167700000	48120800000	497148000000000
-14	-394445000000	-178134000000	-21861200000	18285200000	72743700000	1310830000000	-54308600000	690024000000	-53448400000	-76612100000	501606000000000
-13.75	-122693000000	445859000000	25872400000	137843000000	-105130000000	-674994000000	-54308600000	-877401000000	46229000000	-8575990000	497148000000000
-13.5	-147398000000	249747000000	276473000000	-137139000000	102389000000	-1049010000000	-25670200000	-675152000000	22219100000	-201345000000	506532000000000
-13.25	618448000000	89291700000	37805800000	-483855000000	141917000000	455369000000	-82947000000	-422342000000	90856100000	-76612100000	498721000000000
-13	74944600000	107120000000	324207000000	-149095000000	-65602200000	2899430000000	88883200000	1043960000000	-81034700000	-235363000000	494919000000000
-12.75	272582000000	481516000000	276473000000	-304519000000	23334400000	2348100000000	-187954000000	690024000000	-74249000000	104818000000	499340000000000
-12.5	149059000000	-178134000000	-45727900000	-304519000000	43098100000	-671871000000	-102039000000	-1635830000000	-1806190000	36781500000	504247000000000
-12.25	-196807000000	149818000	-141195000000	-149095000000	-124893000000	1583090000000	-130678000000	-1585270000000	56499300000	297587000000	499827000000000
-12	569039000000	17978200000	133273000000	-101272000000	43098100000	-1925430000000	-159316000000	690024000000	49591300000	184193000000	500857000000000
-11.75	247878000000	-677329000000	-236662000000	-77360600000	-75484000000	-1557890000000	-197500000000	1043960000000	-36331100000	-19915300000	502730000000000
-11.5	830411000	428031000000	49739200000	185665000000	33216300000	2150040000000	-178408000000	-1888640000000	135820000000	-190006000000	498515000000000
-11.25	74944600000	-142477000000	-188929000000	269356000000	62861800000	1441160000000	-178408000000	-1585270000000	53075900000	-8575990000	493777000000000
-11	618448000000	-784299000000	-272462000000	-41493400000	-55720300000	1179240000000	-273869000000	1296770000000	-91274400000	-133309000000	497729000000000
-10.75	-567378000000	196262000000	-176995000000	101975000000	3570750000	-3285110000000	136614000000	-1433580000000	94401900000	-167327000000	505445000000000
-10.5	830411000	-195962000000	61672500000	-352342000000	-115011000000	-2527180000000	-54308600000	-1281900000000	35882200000	-201345000000	500145000000000
-10.25	149059000000	124949000000	-212795000000	-173006000000	52980000000	-1206880000000	-73400900000	1246210000000	-22545600000	36781500000	506157000000000
-10	-122693000000	-463388000000	562875000000	125887000000	-45838500000	1961950000000	-140224000000	32716600000	-22346800000	-31254700000	496699000000000
-9.75	-270921000000	392374000000	-725931000000	-280608000000	230853000000	-2161370000000	241621000000	-1130210000000	-5336680000	-42594100000	502861000000000
-9.5	173763000000	214090000000	133273000000	-232785000000	-85365900000	-1781340000000	-92493100000	1701270000000	49774800000	-121970000000	500744000000000
-9.25	-172103000000	713285000000	109406000000	460647000000	-6311100000	-78565100000	-245231000000	2004640000000	170085000000	-155988000000	504153000000000
-9	74944600000	35806600000	-320196000000	-17582000000	-95247700000	-3733360000000	98429300000	538337000000	12040500000	25442100000	505483000000000
-8.75	-122693000000	-178134000000	-81528100000	-149095000000	-16192900000	-173333000000	-54308600000	32716600000	122019000000	-76612100000	499901000000000
-8.5	50239800000	142777000000	-105395000000	-65404900000	-85365900000	-830620000000	-92493100000	-776277000000	25581300000	-167327000000	501306000000000
-8.25	-394445000000	-356418000000	-21861200000	-137139000000	-6311100000	-1360040000000	127068000000	-624590000000	-91305000000	-224024000000	502599000000000
-8	173763000000	-570359000000	133273000000	-232785000000	122153000000	-663236000000	-102039000000	437213000000	-1897940000	-133309000000	500033000000000
-7.75	74944600000	-178134000000	133273000000	-340387000000	-273121000000	-1628200000000	69791000000	133841000000	63483900000	2763370000	498328000000000
-7.5	-246217000000	17978200000	-379863000000	-161051000000	62861800000	347911000000	-254777000000	-1079650000000	-32861800000	-190006000000	503479000000000
-7.25	74944600000	35806600000	169073000000	-364298000000	112271000000	-735456000000	88883200000	437213000000	-29438400000	-76612100000	501493000000000
-7	-295626000000	-392075000000	25872400000	-113228000000	-35956600000	-266405000000	-207047000000	-270656000000	-167018000000	48120800000	502037000000000
-6.75	50239800000	-106820000000	-45727900000	245444000000	-55720300000	3257560000000	-25670200000	1448450000000	53137100000	-31254700000	495931000000000
-6.5	124354000000	-267276000000	109406000000	185665000000	-85365900000	-719438000000	12514200000	336089000000	180263000000	36781500000	500538000000000
-6.25	-592083000000	178434000000	169073000000	-196918000000	-6311100000	1050970000000	337082000000	1650700000000	-25923200000	138836000000	501906000000000
-6	173763000000	35806600000	121339000000	161754000000	-85365900000	-1977300000000	-159316000000	639462000000	-108590000000	195532000000	502243000000000
-5.75	198468000000	-106820000000	-260529000000	-113228000000	-85365900000	856368000000	-130678000000	942834000000	-49948500000	-235363000000	499396000000000
-5.5	-493264000000	-552530000000	133273000000	-232785000000	-45838500000	-2299110000000	308444000000	1650700000000	-46616800000	-155988000000	501456000000000
-5.25	-419150000000	570658000000	-93461500000	197621000000	-75484000000	-963367000000	41152600000	-472904000000	-122345000000	93478300000	502393000000000
-5	346696000000	-88992100000	240673000000	137843000000	-55720300000	-2750050000000	12514200000	538337000000	-201497000000	116157000000	502280000000000
-4.75	-172103000000	-213791000000	61672500000	-244741000000	33216300000	543166000000	-197500000000	-978525000000	180278000000	252229000000	501625000000000
-4.5	-295626000000	-712986000000	-176995000000	293267000000	-115011000000	3690200000000	117522000000	-826839000000	187232000000	-201345000000	498759000000000
-4.25	741972000000	214090000000	133273000000	-376254000000	23334400000	3717700000000	-216593000000	184403000000	-22683300000	-87951500000	495013000000000
-4	-48579000000	338889000000	133273000000	-137139000000	220971000000	880342000000	98429300000	-118970000000	18612100000	82138900000	505820000000000
-3.75	223173000000	71463400000	13939000000	78063900000	-105130000000	-966314000000	-6578000000	-371780000000	125289000000	-53933400000	503479000000000
-3.5	593744000000	463688000000	-320196000000	-232785000000	-45838500000	-275516000000	-207047000000	-472904000000	-74019600000	-144648000000	499620000000000
-3.25	-122693000000	178434000000	13939000000	197621000000	-45838500000	1247560000000	22060400000	1043960000000	-12244700000	-190006000000	503273000000000
-3	149059000000	-88992100000	-57661300000	-5626220000	72743700000	2370470000000	-245231000000	-321218000000	29081200000	48120800000	496867000000000
-2.75	470220000000	35806600000	-415663000000	-113228000000	-223712000000	-2225920000000	-54308600000	-17845400000	-1897940000	-190006000000	500051000000000
-2.5	-468559000000	-160306000000	419674000000	-173006000000	-75484000000	-3980250000000	-25670200000	336089000000	73784800000	-65272800000	502449000000000
-2.25	830411000	-320761000000	145206000000	66108100000	62861800000	-2562370000000	-35216400000	-321218000000	-56887100000	36781500000	502186000000000
-2	-394445000000	178434000000	-21861200000	-495811000000	-154539000000	-1612480000000	2968120000	538337000000	104687000000	-19915300000	498927000000000
-1.75	25535100000	-445560000000	-129262000000	-161051000000	-55720300000	1084740000000	-102039000000	-624590000000	-53417800000	-155988000000	499152000000000
-1.5	-122693000000	-249448000000	49739200000	221533000000	-6311100000	-1688660000000	-63854700000	1043960000000	-118845000000	-53933400000	502673000000000
-1.25	-468559000000	-445560000000	-117328000000	556293000000	33216300000	2820350000000	-63854700000	690024000000	22157900000	-8575990000	498497000000000
-1	-740311000000	214090000000	109406000000	101975000000	-75484000000	-1565580000000	-54308600000	-1180770000000	29065900000	-65272800000	501025000000000
-0.75	-147398000000	-552530000000	-355996000000	-256697000000	220971000000	614101000000	136614000000	-68407500000	35928100000	-133309000000	495687000000000
-0.5	445515000000	1141170000000	324207000000	3628910000000	319790000000	10528700000000	1205780000000	841710000000	94738300000	2763370000	477519000000000
-0.25	816086000000	1248140000000	49739200000	4382130000000	616245000000	4305360000000	3010000000000	9740640000000	280537000000	195532000000	477613000000000
0	519629000000	1854300000000	288407000000	4525590000000	645891000000	2435920000000	3544580000000	10600200000000	339057000000	48120800000	475833000000000
0.25	1359590000000	873741000000	252607000000	4824490000000	724946000000	1760080000000	4709210000000	9690070000000	477263000000	286247000000	481190000000000
0.5	890200000000	2246530000000	97472700000	4322350000000	715064000000	-358832000000	5577900000000	12117100000000	677062000000	819197000000	480628000000000
0.75	1581930000000	998539000000	479341000000	4358210000000	981874000000	-2669390000000	6332050000000	10701300000000	787866000000	751161000000	482445000000000
1	840791000000	1283790000000	360007000000	5386410000000	1545140000000	-2372250000000	7038460000000	7667590000000	1231910000000	1057320000000	482426000000000
1.25	692562000000	1301620000000	479341000000	4262570000000	1219040000000	1852740000000	7401210000000	10195700000000	1225100000000	581071000000	477145000000000
1.5	741972000000	1426420000000	276473000000	4836440000000	1228920000000	1558440000000	8212630000000	11813700000000	1194160000000	1057320000000	472612000000000
1.75	1409000000000	1854300000000	395807000000	4609280000000	1614310000000	-635292000000	8670850000000	10094600000000	1587100000000	864555000000	471788000000000
2	865495000000	1818650000000	765742000000	4848400000000	1525380000000	743326000000	9205430000000	8274330000000	1590590000000	955270000000	472387000000000
2.25	1532520000000	1889960000000	550941000000	4752750000000	1574780000000	1110960000000	8794950000000	7617030000000	1652640000000	1011970000000	471750000000000
2.5	914905000000	1569050000000	455474000000	4776660000000	1367270000000	863920000000	10112300000000	8173210000000	1997310000000	1034650000000	472481000000000
2.75	890200000000	838084000000	574808000000	4633200000000	1713130000000	913862000000	10580100000000	7768710000000	2107330000000	921252000000	470982000000000
3	1137250000000	1265970000000	479341000000	4609280000000	1515490000000	880446000000	11028700000000	5088920000000	2293500000000	1000630000000	470926000000000
3.25	1606640000000	1569050000000	813476000000	5063600000000	1732890000000	1625620000000	11286500000000	7212530000000	2534770000000	1340810000000	469915000000000
3.5	1359590000000	1515560000000	1028280000000	4872310000000	1426560000000	-47231400000	12250600000000	6757470000000	2259200000000	1204740000000	469503000000000
3.75	1112540000000	855912000000	550941000000	4836440000000	1831710000000	-1144160000000	11983400000000	5392300000000	2393950000000	1068660000000	473960000000000
4	1038430000000	1265970000000	801542000000	4047370000000	1584670000000	241571000000	11935600000000	5392300000000	2396720000000	1499560000000	472144000000000
4.25	1606640000000	1248140000000	610608000000	5171200000000	1752660000000	1396130000000	12412900000000	7313660000000	2741430000000	1658310000000	467892000000000
4.5	1112540000000	1800820000000	467408000000	5003820000000	1742780000000	934761000000	12890200000000	5341730000000	2817000000000	1238750000000	469053000000000
4.75	1409000000000	2068240000000	944743000000	4956000000000	1821830000000	-1303120000000	13128900000000	5897920000000	2779280000000	1658310000000	470065000000000
5	1310180000000	1497730000000	610608000000	5195120000000	1663720000000	595097000000	13338900000000	3622620000000	2911090000000	1885100000000	466600000000000
5.25	890200000000	2068240000000	646408000000	5123380000000	1871240000000	1633340000000	13768500000000	4532740000000	2673350000000	1760360000000	464390000000000
5.5	1285480000000	1408590000000	885076000000	5446190000000	1960180000000	2063890000000	13405700000000	5291170000000	2800640000000	1771700000000	464895000000000
5.75	1680750000000	1105510000000	1171480000000	5135340000000	1871240000000	-1218740000000	13778000000000	5543980000000	3003800000000	1635630000000	467424000000000
6	1063130000000	1372940000000	395807000000	5434230000000	1604430000000	1339310000000	14236200000000	4937240000000	3000640000000	1862420000000	465532000000000
6.25	519629000000	1658190000000	670275000000	5458140000000	1811950000000	-4720740000	14284000000000	4684430000000	2945670000000	1692330000000	466000000000000
6.5	1087840000000	1747330000000	813476000000	5147290000000	2118290000000	-1535880000000	14828100000000	5139490000000	3172840000000	2089210000000	464708000000000
6.75	1236070000000	1979100000000	1016340000000	4669060000000	2049110000000	1218410000000	14914000000000	4178810000000	3117400000000	2157240000000	466993000000000
7	1087840000000	1248140000000	729942000000	5721170000000	1970060000000	-1496660000000	15334000000000	6100170000000	3048580000000	1930450000000	465101000000000
7.25	1359590000000	1551220000000	610608000000	4967960000000	1979940000000	-4192090000000	14694400000000	3167570000000	3182750000000	2145900000000	468754000000000
7.5	964314000000	1961270000000	527075000000	5111430000000	2118290000000	-141793000000	15630000000000	4836110000000	3590040000000	1998490000000	466206000000000
7.75	717267000000	998539000000	1028280000000	5135340000000	2118290000000	-1290300000000	15878200000000	4937240000000	3286120000000	1828400000000	470495000000000
8	914905000000	1426420000000	706075000000	5278810000000	1643960000000	-2370770000000	14770800000000	3875430000000	3510860000000	2032510000000	468679000000000
8.25	1680750000000	1283790000000	729942000000	4896220000000	1910770000000	-1584140000000	15859100000000	6302410000000	3565390000000	2055190000000	466618000000000
8.5	890200000000	1800820000000	944743000000	5266850000000	2325800000000	-1500690000000	15314900000000	5897920000000	3555930000000	2157240000000	462666000000000
8.75	840791000000	1604700000000	813476000000	5565740000000	2226990000000	580900000000	15916400000000	3673190000000	3600100000000	1964470000000	464202000000000
9	989019000000	980711000000	885076000000	5888550000000	2039230000000	391080000000	15840000000000	2813630000000	3606840000000	2236620000000	463228000000000
9.25	1359590000000	2014760000000	825409000000	5828770000000	2256630000000	258127000000	16813700000000	4734990000000	3724240000000	2350010000000	463359000000000
9.5	1310180000000	1426420000000	968610000000	5541830000000	2088640000000	403598000000	16298200000000	4027120000000	3745000000000	2418050000000	465214000000000
9.75	791381000000	1372940000000	1314680000000	5219030000000	1930530000000	757743000000	16345900000000	3066440000000	3586330000000	2542780000000	462535000000000
10	149059000000	2068240000000	1087940000000	5757030000000	2513560000000	-2004820000000	16565500000000	3774310000000	3665830000000	1839740000000	467630000000000
10.25	1161950000000	1747330000000	837343000000	6008100000000	2068880000000	-1170130000000	17252800000000	4431620000000	3555320000000	2247960000000	462704000000000
10.5	964314000000	2121730000000	1410150000000	5972240000000	2157810000000	-1412590000000	17081000000000	5088920000000	4013650000000	2191260000000	464015000000000
10.75	1211360000000	1658190000000	1493680000000	5709210000000	2177580000000	-1996580000000	17166900000000	4279930000000	3789790000000	2350010000000	467480000000000
11	1483110000000	1747330000000	956676000000	5183160000000	2157810000000	224186000000	16718200000000	3015880000000	4021000000000	2043850000000	457928000000000
11.25	1285480000000	1515560000000	897009000000	6055930000000	2207220000000	2489490000000	17262400000000	3976560000000	3872030000000	2440730000000	461655000000000
11.5	1211360000000	1586880000000	849276000000	5446190000000	2394980000000	-1538410000000	16450900000000	2864190000000	3696780000000	2304650000000	467705000000000
11.75	1285480000000	1533390000000	1147610000000	6175480000000	2236870000000	-4157800000000	16699100000000	3774310000000	3654960000000	2826260000000	471376000000000
12	1285480000000	1658190000000	825409000000	6175480000000	2592610000000	222412000000	16689600000000	3673190000000	3899660000000	2247960000000	460025000000000
12.25	1161950000000	1533390000000	1171480000000	6330910000000	2217100000000	-1236620000000	17777800000000	4279930000000	3689920000000	2259300000000	459782000000000
12.5	1631340000000	1765160000000	1087940000000	6450470000000	2088640000000	-777120000000	16680000000000	2358570000000	3996330000000	2384030000000	463228000000000
12.75	1310180000000	1212480000000	908943000000	5195120000000	2464150000000	-326781000000	17386500000000	1145080000000	3852180000000	2554120000000	465513000000000
13	1557230000000	1248140000000	1207280000000	5541830000000	2197340000000	-1382940000000	18971100000000	3976560000000	4006980000000	2610820000000	461337000000000
13.25	643153000000	2157380000000	932810000000	6091790000000	2088640000000	-768816000000	17625100000000	3369810000000	3924480000000	2508760000000	467798000000000
13.5	1260770000000	1462080000000	873143000000	6318950000000	2157810000000	78320300000	17462800000000	1903510000000	3930730000000	2327330000000	460138000000000
13.75	1557230000000	1747330000000	1040210000000	5733120000000	2147930000000	-451701000000	17567800000000	3926000000000	4120860000000	2315990000000	464539000000000
14	989019000000	2620920000000	1159540000000	6079840000000	2147930000000	-197647000000	18188300000000	2055200000000	4099190000000	2633490000000	463903000000000
14.25	1161950000000	1087680000000	1374340000000	5709210000000	2414740000000	-2817140000000	17663300000000	3015880000000	3893660000000	2123220000000	464109000000000
14.5	1433700000000	1069850000000	1278880000000	5984190000000	2444390000000	667919000000	18178800000000	4077680000000	4193040000000	2440730000000	462030000000000
14.75	593744000000	1854300000000	1255010000000	5625520000000	2464150000000	751071000000	18245600000000	2712510000000	4082620000000	2678850000000	459632000000000
15	1433700000000	1729500000000	992477000000	5972240000000	2256630000000	-4791870000000	18694300000000	3521500000000	3934280000000	2508760000000	460924000000000
15.25	1186660000000	1925620000000	992477000000	6629800000000	2780370000000	-335639000000	18293300000000	2914750000000	4068570000000	2588140000000	462797000000000
15.5	1384290000000	1355110000000	1362410000000	5625520000000	2691430000000	-96430400000	18808800000000	1650700000000	4199580000000	2928320000000	464127000000000
15.75	1161950000000	2139560000000	1004410000000	5852680000000	2365330000000	1647930000000	18799300000000	1448450000000	3975700000000	2633490000000	462723000000000
16	1458410000000	1426420000000	1076010000000	6139620000000	2572850000000	1128920000000	18236100000000	3420380000000	4144640000000	2576800000000	457703000000000
16.25	1483110000000	1533390000000	1231140000000	6103750000000	2483910000000	374348000000	17892400000000	4836110000000	4017820000000	2418050000000	463828000000000
16.5	1334880000000	1248140000000	1147610000000	6008100000000	2226990000000	-1165050000000	19477100000000	588899000000	4055090000000	2281970000000	462685000000000
16.75	1359590000000	1854300000000	1374340000000	5828770000000	2691430000000	-537310000000	18675200000000	2965320000000	4134770000000	2508760000000	461449000000000
17	989019000000	1158990000000	956676000000	5768990000000	2434510000000	-164990000000	18007000000000	2105760000000	4303780000000	2814920000000	464858000000000
17.25	1161950000000	1693850000000	1374340000000	5948330000000	2543210000000	206282000000	18961600000000	1397890000000	4055050000000	2440730000000	457516000000000
17.5	865495000000	1836470000000	1004410000000	6127660000000	2385100000000	-1587560000000	18713400000000	3470940000000	3951630000000	2395370000000	461074000000000
17.75	1334880000000	1337280000000	932810000000	6175480000000	2671670000000	-522765000000	18875700000000	3167570000000	3975830000000	2826260000000	461037000000000
18	1754870000000	1747330000000	1422080000000	6450470000000	2642020000000	-700115000000	18866100000000	1802390000000	4185800000000	2644830000000	463303000000000
18.25	989019000000	1551220000000	1183410000000	6785230000000	2790250000000	-1300740000000	18532000000000	942834000000	4182590000000	2463400000000	464858000000000
18.5	1211360000000	1818650000000	1135680000000	5685300000000	2553090000000	-2486240000000	18684700000000	2409130000000	3845240000000	2361350000000	461337000000000
18.75	1730160000000	2014760000000	1577210000000	6175480000000	2118290000000	-2436490000000	18446100000000	2206890000000	3973070000000	2384030000000	464858000000000
19	1730160000000	1658190000000	1040210000000	5876590000000	2404860000000	-1891720000000	19095200000000	3875430000000	4148400000000	2701530000000	460999000000000
19.25	1087840000000	2300010000000	825409000000	6115710000000	2335690000000	-1051770000000	18617900000000	2661940000000	4262290000000	2554120000000	464240000000000
19.5	1606640000000	1782990000000	1052140000000	6175480000000	2879190000000	453793000000	19419800000000	2206890000000	3913860000000	2452070000000	463416000000000
19.75	2174850000000	1889960000000	1195340000000	6474380000000	2424620000000	-5317680000000	18665600000000	2055200000000	4254940000000	2792250000000	462741000000000
20	1853680000000	945054000000	1147610000000	6032020000000	2236870000000	234818000000	19286100000000	2308010000000	4089630000000	2656170000000	458546000000000
20.25	1581930000000	1497730000000	1326610000000	5876590000000	2296160000000	451242000000	19018800000000	1600140000000	3945590000000	2520100000000	460437000000000
20.5	1483110000000	2210870000000	1231140000000	5517920000000	2404860000000	-682829000000	19534300000000	2510260000000	4131240000000	3121090000000	460850000000000
20.75	1359590000000	1925620000000	1195340000000	6498290000000	2375210000000	-3801480000000	19639300000000	2004640000000	4076490000000	2622160000000	462535000000000
21	1557230000000	1372940000000	1660750000000	6498290000000	2800130000000	-1614470000000	18665600000000	1448450000000	4161970000000	2712870000000	461711000000000
21.25	1409000000000	2620920000000	1016340000000	6223310000000	2582730000000	-1360510000000	18875700000000	588899000000	4010050000000	2259300000000	463584000000000
21.5	1828980000000	1408590000000	1326610000000	6318950000000	2414740000000	-2923560000000	19095200000000	3926000000000	4251090000000	2758230000000	460437000000000
21.75	816086000000	1479910000000	1016340000000	5852680000000	2760610000000	-23291200000	19028400000000	3774310000000	4213960000000	2418050000000	463977000000000
22	2224250000000	1265970000000	1505610000000	6115710000000	2513560000000	-723423000000	20078500000000	2358570000000	3821050000000	2440730000000	458490000000000
22.25	1853680000000	1800820000000	1517550000000	6199400000000	2602500000000	505415000000	19591600000000	1549580000000	4251820000000	2327330000000	462329000000000
22.5	1260770000000	1622530000000	1171480000000	6462420000000	2444390000000	-2400630000000	19534300000000	3117000000000	4272300000000	2599480000000	464427000000000
22.75	1285480000000	1818650000000	1601080000000	5960280000000	2414740000000	-731314000000	19362500000000	3066440000000	3958630000000	2508760000000	455830000000000
23	643153000000	1961270000000	1243080000000	5721170000000	2681550000000	2907620000000	19858900000000	841710000000	4286620000000	2247960000000	457665000000000
23.25	890200000000	2139560000000	1195340000000	6474380000000	2355450000000	-698340000000	20202600000000	2459700000000	4210480000000	2826260000000	461205000000000
23.5	2125440000000	2389150000000	1863610000000	6522200000000	2661790000000	222666000000	19095200000000	4431620000000	4069120000000	2905640000000	459726000000000
23.75	1087840000000	1800820000000	968610000000	6318950000000	2661790000000	-436111000000	20154800000000	3066440000000	4103450000000	2520100000000	455699000000000
24	1433700000000	1711670000000	1087940000000	5888550000000	2572850000000	1614400000000	19591600000000	1145080000000	4041720000000	2497420000000	459201000000000
24.25	1409000000000	1586880000000	1565280000000	6247220000000	2582730000000	1164520000000	19448400000000	437213000000	4221210000000	3098410000000	457572000000000
24.5	1804270000000	1836470000000	1302740000000	6390690000000	2671670000000	-1327410000000	19696600000000	2004640000000	4355010000000	2395370000000	459220000000000
24.75	1730160000000	2139560000000	1792010000000	6055930000000	2711200000000	-602116000000	19553400000000	4633870000000	4089590000000	2690190000000	458939000000000
25	1186660000000	3120120000000	1231140000000	5996150000000	2750720000000	-2492910000000	20250300000000	3774310000000	4307020000000	2429390000000	458433000000000
25.25	1878390000000	2032590000000	1326610000000	6103750000000	2760610000000	-66231300000	19238400000000	3926000000000	4034640000000	2848940000000	459595000000000
25.5	1878390000000	1355110000000	1195340000000	6677630000000	2543210000000	-2350390000000	20431700000000	3369810000000	4141410000000	2837600000000	461374000000000
25.75	2323070000000	2317840000000	1123740000000	6414600000000	2800130000000	624154000000	19438900000000	3218130000000	4086470000000	2531440000000	453826000000000
26	1804270000000	1212480000000	1374340000000	6558070000000	2968130000000	-696661000000	19267000000000	2358570000000	4148890000000	2474740000000	461617000000000
26.25	1409000000000	2086070000000	1278880000000	6295040000000	2602500000000	191831000000	20011600000000	2560820000000	4279740000000	2860280000000	455418000000000
26.5	2199550000000	1676020000000	1505610000000	6868920000000	2622260000000	-521498000000	19820700000000	2055200000000	4069290000000	2962340000000	459538000000000
26.75	1680750000000	2157380000000	1314680000000	6474380000000	2385100000000	757425000000	19753900000000	2105760000000	4213690000000	2599480000000	458115000000000
27	1359590000000	891569000000	1601080000000	5792900000000	2997770000000	4581690000000	20011600000000	2004640000000	4248750000000	2554120000000	457834000000000
27.25	2347780000000	2157380000000	1278880000000	6330910000000	2572850000000	271594000000	19123800000000	2004640000000	4244940000000	2780910000000	459426000000000
27.5	1606640000000	1693850000000	1541410000000	6534160000000	2770490000000	-63284400000	19572500000000	437213000000	3972730000000	2962340000000	458508000000000
27.75	1656050000000	2246530000000	1266940000000	6952610000000	2513560000000	-1806890000000	19391100000000	1145080000000	4303510000000	2486080000000	459014000000000
28	1384290000000	2121730000000	1541410000000	6629800000000	2434510000000	-2255640000000	19992500000000	1094520000000	3920450000000	3030370000000	459651000000000
28.25	2248960000000	2121730000000	1505610000000	6354820000000	2711200000000	-2197300000000	19477100000000	2004640000000	4120840000000	2678850000000	460213000000000
28.5	1334880000000	1943440000000	1398210000000	6581980000000	2869310000000	-2255990000000	19171600000000	1549580000000	4172850000000	2837600000000	462460000000000
28.75	1903090000000	2424810000000	1780080000000	6330910000000	2849540000000	-2270530000000	19477100000000	4279930000000	4255230000000	3211800000000	462872000000000
29	1557230000000	2620920000000	1302740000000	6701540000000	2829780000000	739013000000	19658400000000	2257450000000	4038280000000	3211800000000	458302000000000
29.25	2001910000000	2335670000000	1887480000000	6426560000000	2721080000000	351435000000	20088000000000	2358570000000	4048280000000	3279840000000	454950000000000
29.5	1581930000000	2300010000000	1982950000000	6067880000000	2849540000000	-1591630000000	19553400000000	2459700000000	4148290000000	2905640000000	459894000000000
29.75	1878390000000	1943440000000	2018750000000	6139620000000	2582730000000	264163000000	20574900000000	3673190000000	4223650000000	2724210000000	457422000000000
30	1507820000000	1355110000000	1422080000000	6390690000000	2780370000000	93832200000	20460300000000	1751830000000	4196880000000	3472610000000	459782000000000
30.25	1384290000000	1765160000000	1123740000000	5876590000000	2829780000000	-1809470000000	20221700000000	2358570000000	3890080000000	2486080000000	463266000000000
30.5	1433700000000	1854300000000	1517550000000	5745080000000	2839660000000	-3181940000000	19543900000000	386651000000	4207250000000	3245820000000	460194000000000
30.75	1359590000000	2086070000000	1648810000000	6629800000000	2898950000000	-3450700000000	20021200000000	993396000000	4035210000000	3121090000000	459033000000000
31	1236070000000	1836470000000	1959080000000	6187440000000	2701320000000	-2000620000000	20193000000000	5038360000000	4320820000000	2894300000000	459070000000000
31.25	1779570000000	1265970000000	1565280000000	6127660000000	2918720000000	-934396000000	19200200000000	3117000000000	4382870000000	2916980000000	459744000000000
31.5	2594830000000	1604700000000	1362410000000	5924410000000	2829780000000	-1770410000000	19858900000000	2510260000000	4086670000000	2860280000000	461449000000000
31.75	1384290000000	2103900000000	1684610000000	5768990000000	2711200000000	535679000000	21090400000000	791148000000	3900730000000	2406710000000	462517000000000
32	1656050000000	2157380000000	1636880000000	6055930000000	2592610000000	-838536000000	19782500000000	3572060000000	4044840000000	2951000000000	454313000000000
32.25	1112540000000	2710060000000	1338540000000	6342870000000	2869310000000	1063610000000	20403000000000	2864190000000	3872430000000	2860280000000	455792000000000
32.5	1903090000000	1658190000000	1278880000000	6259180000000	2701320000000	606060000000	19563000000000	740586000000	3996440000000	2542780000000	458433000000000
32.75	1680750000000	2193040000000	1386280000000	6546110000000	2681550000000	-2576780000000	20049800000000	3319250000000	4251670000000	2735550000000	460475000000000
33	1186660000000	1854300000000	1553350000000	7012390000000	2810020000000	-2404310000000	20221700000000	2965320000000	4172530000000	2474740000000	459183000000000
33.25	1828980000000	2549610000000	2030680000000	6797180000000	2780370000000	196522000000	20078500000000	2409130000000	4162080000000	2780910000000	459464000000000
33.5	1656050000000	2068240000000	1875550000000	6498290000000	2572850000000	-708212000000	19582100000000	1701270000000	4265320000000	2894300000000	459688000000000
33.75	1656050000000	1961270000000	1469810000000	6426560000000	2800130000000	-1018120000000	19438900000000	1802390000000	3875880000000	3075730000000	458021000000000
34	1483110000000	2513950000000	1362410000000	6570020000000	2800130000000	508457000000	19944800000000	2510260000000	3965150000000	3336540000000	458733000000000
34.25	1581930000000	3173600000000	1720410000000	5745080000000	2592610000000	-836032000000	20212100000000	2763070000000	3828170000000	3030370000000	458546000000000
34.5	1507820000000	1925620000000	1350480000000	6008100000000	2889070000000	-2608820000000	20183500000000	2257450000000	4217880000000	2996350000000	462385000000000
34.75	1433700000000	2032590000000	1744280000000	6486330000000	2444390000000	1170720000000	19925700000000	2308010000000	4230940000000	3268500000000	453845000000000
35	2174850000000	2603090000000	1434010000000	6438510000000	2879190000000	-1796810000000	20527100000000	2358570000000	4093710000000	2837600000000	461486000000000
35.25	1853680000000	1996930000000	1445950000000	5924410000000	2908830000000	-107397000000	20049800000000	1094520000000	3797110000000	3019030000000	453114000000000
35.5	1878390000000	2531780000000	1565280000000	6330910000000	3146000000000	-552633000000	20068900000000	2358570000000	3914260000000	2803590000000	456785000000000
35.75	1952500000000	2745720000000	2090350000000	6653710000000	2622260000000	855900000000	19400700000000	1954080000000	3927970000000	3075730000000	460381000000000
36	1705460000000	2567440000000	1935210000000	6151570000000	2612380000000	710064000000	20164400000000	639462000000	3917770000000	2780910000000	455362000000000
36.25	1606640000000	1729500000000	1636880000000	6581980000000	2671670000000	148908000000	20517600000000	841710000000	4082450000000	3132430000000	457010000000000
36.5	1927800000000	2763550000000	1350480000000	6330910000000	2444390000000	-627847000000	20202600000000	1145080000000	4165870000000	2837600000000	460587000000000
36.75	1754870000000	1052020000000	1529480000000	6163530000000	3175640000000	-1738260000000	20412600000000	-17845400000	3941980000000	2803590000000	463003000000000
37	1878390000000	1765160000000	1696550000000	6641760000000	2987890000000	331154000000	20011600000000	1397890000000	3855690000000	3200460000000	459744000000000
37.25	1705460000000	2371330000000	1589150000000	6785230000000	2918720000000	1882500000000	19582100000000	1246210000000	4285840000000	3019030000000	458752000000000
37.5	1927800000000	2727890000000	1863610000000	6546110000000	3126230000000	32845600000	20097600000000	1701270000000	3869510000000	2508760000000	458752000000000
37.75	1606640000000	1979100000000	1756210000000	6055930000000	3047180000000	-1187440000000	19028400000000	336089000000	3803820000000	2780910000000	459183000000000
38	1483110000000	2068240000000	1195340000000	5840720000000	2978010000000	-2809730000000	20689400000000	1701270000000	3955770000000	3257160000000	460138000000000
38.25	1730160000000	2086070000000	1577210000000	6629800000000	3007650000000	-1263250000000	20909000000000	1802390000000	3786670000000	2871620000000	466094000000000
38.5	2125440000000	2424810000000	1255010000000	6462420000000	2770490000000	-104528000000	19467500000000	1347330000000	4165730000000	3336540000000	460512000000000
38.75	1557230000000	2086070000000	1505610000000	6127660000000	3027420000000	145755000000	20880300000000	1145080000000	3834720000000	3189120000000	457141000000000
39	2076030000000	2139560000000	1959080000000	6115710000000	2800130000000	-1519370000000	20966300000000	3976560000000	4038400000000	2962340000000	457178000000000
39.25	1952500000000	2121730000000	2233550000000	6593940000000	2978010000000	-2565180000000	19477100000000	3167570000000	4152110000000	3291180000000	461149000000000
39.5	1730160000000	2353500000000	1422080000000	5888550000000	2810020000000	-1509240000000	21061700000000	3824870000000	4076180000000	2962340000000	458396000000000
39.75	1656050000000	2228700000000	1660750000000	6211350000000	2849540000000	-617976000000	21395800000000	386651000000	3876250000000	3370550000000	462104000000000
40	1903090000000	2727890000000	1672680000000	6510250000000	3096590000000	401282000000	19801600000000	740586000000	3872810000000	2916980000000	455961000000000
40.25	2026620000000	2335670000000	2090350000000	6318950000000	2997770000000	-2265150000000	20183500000000	1600140000000	3976030000000	3041710000000	461299000000000
40.5	2496010000000	2496120000000	1803950000000	6856960000000	3304110000000	1457700000000	19696600000000	3976560000000	3817870000000	3574660000000	459838000000000
40.75	1507820000000	1925620000000	1899410000000	6259180000000	3185530000000	-2670910000000	20670300000000	1094520000000	3876130000000	3234480000000	465064000000000
41	2076030000000	2210870000000	1982950000000	6701540000000	3215170000000	-513052000000	19601200000000	3470940000000	3969430000000	3223140000000	460344000000000
41.25	1754870000000	2745720000000	1911350000000	6187440000000	3007650000000	-438345000000	20870800000000	942834000000	3762340000000	2962340000000	457141000000000
41.5	1853680000000	1569050000000	1911350000000	6462420000000	2483910000000	185795000000	20135700000000	2105760000000	3778970000000	3211800000000	461355000000000
41.75	1952500000000	3244920000000	2269350000000	6103750000000	2740840000000	-1458450000000	20823100000000	2055200000000	3959240000000	3211800000000	453489000000000
42	1878390000000	2014760000000	1756210000000	6115710000000	2898950000000	1612930000000	20651200000000	1499020000000	3989480000000	3302520000000	459744000000000
42.25	1656050000000	2799210000000	2209680000000	6868920000000	2987890000000	-1078850000000	20660800000000	1246210000000	3555850000000	3189120000000	456692000000000
42.5	2224250000000	2888350000000	1899410000000	6067880000000	2908830000000	-3509480000000	20889900000000	1600140000000	3835210000000	2814920000000	463790000000000
42.75	2397190000000	1872130000000	1971010000000	6342870000000	3057060000000	1552290000000	20326700000000	3218130000000	4082970000000	3291180000000	455905000000000
43	1483110000000	2620920000000	2257420000000	6486330000000	3205290000000	-2701490000000	20574900000000	1549580000000	3928350000000	2928320000000	460456000000000
43.25	1705460000000	2549610000000	1756210000000	6450470000000	2948360000000	-1557200000000	20765800000000	1296770000000	3841970000000	3109750000000	458752000000000
43.5	2125440000000	2692240000000	2114210000000	5984190000000	3037300000000	-4025690000000	20832600000000	1701270000000	4193530000000	3007690000000	461449000000000
43.75	1853680000000	1996930000000	2412550000000	6032020000000	2869310000000	-1533870000000	19925700000000	2763070000000	3776130000000	3019030000000	456336000000000
44	1754870000000	2549610000000	1935210000000	5972240000000	3274460000000	-1021270000000	20813500000000	3420380000000	3828900000000	3336540000000	458152000000000
44.25	1409000000000	2103900000000	1744280000000	6032020000000	3106470000000	-2852610000000	20154800000000	2257450000000	3731620000000	2996350000000	460475000000000
44.5	1903090000000	2513950000000	2197750000000	6091790000000	2701320000000	-2419620000000	19868400000000	1954080000000	3683310000000	3189120000000	460494000000000
44.75	2718350000000	2139560000000	1947150000000	6151570000000	2997770000000	1819420000000	21109400000000	3015880000000	3983120000000	3313860000000	455399000000000
45	1557230000000	2603090000000	1971010000000	6103750000000	2730960000000	-2527280000000	20336200000000	1852950000000	3876050000000	3007690000000	464296000000000
45.25	2100730000000	2781380000000	1887480000000	6486330000000	2721080000000	254149000000	20393500000000	1448450000000	3886490000000	3234480000000	459670000000000
45.5	2372480000000	2014760000000	1756210000000	7012390000000	3017530000000	872014000000	21348100000000	2308010000000	3914440000000	3041710000000	456916000000000
45.75	2174850000000	1818650000000	2006810000000	6689580000000	2800130000000	547325000000	19668000000000	2409130000000	3969950000000	3483950000000	461936000000000
46	1853680000000	1925620000000	2173880000000	6187440000000	3284340000000	-827999000000	20603500000000	2004640000000	4062450000000	3438590000000	457441000000000
46.25	2150140000000	2817030000000	2114210000000	6522200000000	2790250000000	-301320000000	20269400000000	1701270000000	3914140000000	3291180000000	458190000000000
46.5	1631340000000	2496120000000	2102280000000	5733120000000	3126230000000	1356970000000	20450800000000	942834000000	3721640000000	3200460000000	453039000000000
46.75	2051320000000	2228700000000	1780080000000	6462420000000	3116350000000	-2291910000000	19963900000000	3015880000000	3706970000000	3087070000000	458171000000000
47	1779570000000	2478300000000	1672680000000	6773270000000	3076830000000	-1720940000000	20088000000000	2510260000000	3766160000000	2769570000000	453320000000000
47.25	2174850000000	3369710000000	2102280000000	6474380000000	2829780000000	676601000000	20116600000000	3521500000000	3869600000000	3631360000000	456560000000000
47.5	2273660000000	2246530000000	1947150000000	6354820000000	3175640000000	1815390000000	20784900000000	2156320000000	3962090000000	2826260000000	452964000000000
47.75	1532520000000	2870520000000	2197750000000	6653710000000	3116350000000	-2325420000000	20632100000000	2055200000000	3827820000000	3574660000000	460625000000000
48	1828980000000	2335670000000	2388680000000	6725450000000	3047180000000	-1136640000000	20068900000000	336089000000	3769630000000	3087070000000	454275000000000
48.25	2372480000000	2371330000000	2293220000000	6378730000000	2730960000000	877718000000	20193000000000	1549580000000	3962110000000	3223140000000	459763000000000
48.5	2248960000000	2389150000000	2245480000000	6510250000000	3195410000000	-2258930000000	19916200000000	1701270000000	3775790000000	3075730000000	463547000000000
48.75	2051320000000	2834860000000	1947150000000	6570020000000	3027420000000	-1853630000000	20622600000000	1145080000000	3693600000000	3302520000000	459126000000000
49	2026620000000	2727890000000	1803950000000	5840720000000	3462220000000	-2605840000000	20956700000000	3723750000000	3903540000000	2985020000000	454069000000000
49.25	1507820000000	2638750000000	2054550000000	5900500000000	3353520000000	557480000000	20393500000000	2510260000000	3766070000000	3415910000000	455924000000000
49.5	2372480000000	2674410000000	1959080000000	7072160000000	3353520000000	-463729000000	20994900000000	184403000000	4082530000000	3449930000000	455980000000000
49.75	1730160000000	2210870000000	2508020000000	5852680000000	3225050000000	755539000000	20909000000000	1347330000000	3848940000000	3472610000000	456748000000000
50	2248960000000	2442640000000	1994880000000	6988470000000	2730960000000	-1142420000000	20622600000000	2206890000000	3983220000000	3551980000000	459913000000000
50.25	2545420000000	2727890000000	1887480000000	6067880000000	3412810000000	-477449000000	20574900000000	1195640000000	3824260000000	3336540000000	460213000000000
50.5	1977210000000	2567440000000	1815880000000	5924410000000	3808080000000	-1348720000000	21329000000000	2105760000000	4045040000000	3438590000000	459239000000000
50.75	2076030000000	2745720000000	1959080000000	6330910000000	3215170000000	448879000000	20393500000000	1347330000000	3676510000000	3880820000000	452440000000000
51	2125440000000	2834860000000	1935210000000	6534160000000	3570920000000	-794423000000	20059400000000	2611380000000	3745560000000	3211800000000	459707000000000
51.25	1977210000000	1961270000000	2245480000000	6199400000000	3462220000000	-218056000000	20145300000000	2712510000000	3828210000000	3449930000000	459258000000000
51.5	2347780000000	2888350000000	2293220000000	6020060000000	3531390000000	-3254320000000	20756200000000	2459700000000	3827770000000	3449930000000	459445000000000
51.75	2150140000000	2870520000000	2102280000000	6151570000000	3462220000000	-529484000000	19983000000000	1751830000000	3776590000000	3529300000000	459389000000000
52	1656050000000	3387540000000	2388680000000	6785230000000	3205290000000	-4130930000000	21071300000000	1145080000000	3838130000000	3449930000000	458789000000000
52.25	1532520000000	2727890000000	1994880000000	6605890000000	3205290000000	-1837210000000	20374400000000	1802390000000	3848940000000	3722070000000	454107000000000
52.5	1507820000000	2906180000000	2555750000000	6510250000000	3284340000000	-2653090000000	20775300000000	1600140000000	3772810000000	3483950000000	454781000000000
52.75	2174850000000	2763550000000	1839750000000	6809140000000	3393040000000	-1085550000000	20374400000000	3218130000000	3862970000000	3676720000000	461018000000000
53	2594830000000	2870520000000	2185820000000	6701540000000	3541270000000	-3265040000000	20966300000000	3066440000000	3772400000000	3665380000000	461337000000000
53.25	1977210000000	2406980000000	2281280000000	5996150000000	3541270000000	-836951000000	20126200000000	1448450000000	3686580000000	3200460000000	457235000000000
53.5	2644230000000	2246530000000	1720410000000	6689580000000	3185530000000	-2487480000000	20851700000000	2358570000000	3804370000000	3688060000000	455605000000000
53.75	2619530000000	2549610000000	2138080000000	6342870000000	3561040000000	-1593680000000	20240700000000	1751830000000	3635220000000	3574660000000	456317000000000
54	1878390000000	2050410000000	1839750000000	6761320000000	3304110000000	-3423080000000	20097600000000	1145080000000	3669440000000	3064390000000	458752000000000
54.25	2273660000000	3494510000000	2161950000000	6892830000000	3284340000000	-2189010000000	20221700000000	1701270000000	3924120000000	3019030000000	458808000000000
54.5	2421890000000	3013150000000	2388680000000	5745080000000	3234930000000	417207000000	21185800000000	1954080000000	3559630000000	3472610000000	457516000000000
54.75	2298370000000	2674410000000	2126150000000	5864640000000	3313990000000	-4204570000000	21214500000000	4633870000000	3924770000000	3427250000000	459538000000000
55	1730160000000	2264350000000	2042610000000	6199400000000	3432570000000	1711940000000	20699000000000	740586000000	3724670000000	3914840000000	454182000000000
55.25	1631340000000	2710060000000	2293220000000	5864640000000	3333750000000	-448835000000	20679900000000	1650700000000	3930810000000	3597340000000	452758000000000
55.5	1483110000000	2817030000000	2185820000000	6067880000000	3590680000000	-1841330000000	20794400000000	2459700000000	3573040000000	3495290000000	454182000000000
55.75	2446600000000	3316230000000	2448350000000	6402640000000	3333750000000	-2009320000000	20632100000000	3369810000000	3597450000000	3778770000000	458565000000000
56	2150140000000	3423200000000	2114210000000	6271130000000	2978010000000	-2263070000000	20670300000000	2712510000000	3710690000000	3121090000000	457647000000000
56.25	2644230000000	3316230000000	1947150000000	5924410000000	3106470000000	2912890000000	20154800000000	1954080000000	3797400000000	3245820000000	452627000000000
56.5	2644230000000	2817030000000	2090350000000	6103750000000	2997770000000	-3525980000000	19830300000000	1954080000000	3803880000000	4152970000000	458115000000000
56.75	2397190000000	2852690000000	2424480000000	6211350000000	3383160000000	-3570370000000	20116600000000	1448450000000	3738580000000	3574660000000	460250000000000
57	2397190000000	2406980000000	2448350000000	6020060000000	3442450000000	-3217560000000	20689400000000	2156320000000	3589930000000	3710730000000	454350000000000
57.25	3261850000000	2745720000000	2531880000000	6032020000000	3066940000000	200324000000	20154800000000	1751830000000	3799890000000	3461270000000	454968000000000
57.5	2273660000000	2585270000000	2221620000000	6139620000000	3659850000000	-1393690000000	20937600000000	1903510000000	3587210000000	3767430000000	457253000000000
57.75	2248960000000	2674410000000	2245480000000	6414600000000	3541270000000	-1825460000000	21033100000000	3268690000000	3438810000000	3756090000000	456991000000000
58	2446600000000	3084460000000	3009220000000	6402640000000	3481980000000	-2587020000000	20336200000000	2409130000000	3700540000000	3710730000000	455792000000000
58.25	2446600000000	2389150000000	2519950000000	5505960000000	3491860000000	2736600000000	20574900000000	3167570000000	3634470000000	3858150000000	452440000000000
58.5	2224250000000	2692240000000	2173880000000	5733120000000	3383160000000	-1482130000000	19887500000000	1246210000000	3573260000000	3404570000000	458714000000000
58.75	1409000000000	3155770000000	2567680000000	6283090000000	3659850000000	-1301720000000	20364800000000	892272000000	3559200000000	3824130000000	458827000000000
59	2767760000000	2959660000000	2543820000000	5912460000000	3679620000000	-587888000000	20937600000000	1751830000000	3425030000000	3960200000000	454107000000000
59.25	2471300000000	2478300000000	2484150000000	6295040000000	3225050000000	76687900000	20622600000000	2914750000000	3380540000000	4028240000000	458471000000000
59.5	2496010000000	2300010000000	2150010000000	6032020000000	3393040000000	-1485400000000	21004400000000	1701270000000	3666180000000	3574660000000	455380000000000
59.75	3039510000000	2959660000000	1899410000000	5996150000000	3136120000000	-2765330000000	20460300000000	1600140000000	3762770000000	3472610000000	458003000000000
60	2150140000000	3637140000000	1923280000000	5984190000000	3244820000000	-2114310000000	20823100000000	2257450000000	3538440000000	3801450000000	455605000000000

## Sheet: 625K
Time (ms)	m/z 28 Ethene	m/z 30 Formaldehyde	m/z 56 Acrolein	m/z 70 (2,3-DHF & 2,5-DHF)	m/z 86 THF-3-one	m/z 71 ROO	m/z 58 butanedial	m/z 103 OOQOOH	Sum UHP + KHP	m/z 84	m/z 72 THF
-30	632202000000	-662671000000	73897300000	167397000000	-98673800000	-946718000000	354731000000	-3068990000000	50433800000	295014000000	504985000000000
-29.75	-22445000000	661718000000	111911000000	-365162000000	310206000000	-191712000000	545653000000	318669000000	-87023700000	295014000000	504449000000000
-29.5	134670000000	-476971000	-78156500000	-136922000000	100524000000	-460849000000	412007000000	-1451000000000	157187000000	283675000000	497259000000000
-29.25	501273000000	-476971000	-141512000000	205437000000	247301000000	162593000000	163808000000	-288076000000	-7917590000	68226700000	496981000000000
-29	501273000000	169802000000	-382264000000	218117000000	-56737500000	-1075880000000	154262000000	116420000000	-131850000000	181620000000	498133000000000
-28.75	-179560000000	-38316700000	48555000000	142037000000	-4316980000	-270272000000	58800900000	-338638000000	-66513700000	136263000000	496584000000000
-28.5	108484000000	131962000000	-217539000000	-542682000000	121492000000	-360526000000	87439300000	268106000000	-49167100000	-101864000000	503218000000000
-28.25	-205746000000	245481000000	-2129610000	91317100000	446499000000	-14959200000	144716000000	-2967870000000	50449100000	102245000000	496664000000000
-28	82298500000	283321000000	213280000000	116677000000	27135300000	-767442000000	125624000000	-894821000000	-11081100000	363050000000	497379000000000
[truncated: 352 more rows]

## Sheet: 650K
Time (ms)	m/z 28 Ethene	m/z 30 Formaldehyde	m/z 56 Acrolein	m/z 70 (2,3-DHF & 2,5-DHF)	m/z 86 THF-3-one	m/z 71 ROO	m/z 58 butanedial	m/z 103 OOQOOH	Sum UHP + KHP	m/z 84	m/z 72 THF
[truncated: 361 more rows]

[truncated: 1 more sheets: 675K]
